# Supplementary material for: A newly synthesized reference material for in situ sulfur isotope measurement of sphalerite using laser ablation MC-ICP-MS
Source: Royal Society of Chemistry journal article supplement (doi:10.1039/d2ja00394e), 2023-01-01
Supplement: d2ja00394e2.xlsx [file d2ja00394e2.xlsx]

## Sheet: Sheet1
SampleName	'33/32 Raw'	SE	'34/32 Raw'	SE	'Total Beam (V)'	SE		δ34S	δ34SVCDT	1se
nbs123	0.00841346	9.11e-07	0.0501276	2.59e-06	9.11937	0.1
1-1	0.00831038	9.26e-07	0.0489858	1.55e-06	8.64876	0.0797		-22.8883	-5.54454	0.0679278
1-1	0.00831154	8.06e-07	0.0489852	1.52e-06	8.56197	0.0815		-22.9012	-5.55774	0.0676449
1-1	0.00831052	8.1e-07	0.0489884	1.65e-06	8.5478	0.0867		-22.8382	-5.49358	0.0689016
nbs123	0.00841105	9.68e-07	0.050139	1.54e-06	9.00184	0.0821
1-1	0.00831094	7.76e-07	0.0489891	1.71e-06	8.60407	0.0823		-22.926	-5.58298	0.0560565
1-1	0.008312	9.11e-07	0.0489889	1.48e-06	8.50907	0.0777		-22.9312	-5.58825	0.0532599
1-1	0.0083114	7.82e-07	0.0489883	1.85e-06	8.47423	0.0793		-22.9422	-5.59942	0.0578796
nbs123	0.00841008	8.49e-07	0.0501382	1.57e-06	8.84164	0.0821
1-1	0.00831179	9.18e-07	0.0489927	1.45e-06	8.37664	0.0761		-22.9195	-5.57628	0.0558255
1-1	0.00831087	8.85e-07	0.0489885	1.46e-06	8.30815	0.0753		-23.0016	-5.65991	0.0559353
1-1	0.00831323	9.14e-07	0.0489938	1.78e-06	8.46727	0.0783		-22.8971	-5.55355	0.0596699
nbs123	0.00841105	8.65e-07	0.0501456	1.78e-06	8.77586	0.0899					-5.57292	0.090338
1-2	0.00831158	8.61e-07	0.0490002	1.47e-06	8.49186	0.0806		-22.8257	-5.48087	0.0561502
1-2	0.008312	1.04e-06	0.0489982	1.46e-06	8.52771	0.0789		-22.8648	-5.52065	0.056042
1-2	0.00831243	8.9e-07	0.0489967	1.7e-06	8.48367	0.0814		-22.8959	-5.55231	0.0587935
nbs123	0.00841139	8.87e-07	0.0501439	1.58e-06	8.6974	0.0796
1-2	0.00831236	9.68e-07	0.0490025	1.72e-06	8.40153	0.0711		-22.6576	-5.30978	0.0560724
1-2	0.00831172	8.89e-07	0.049001	1.56e-06	8.45951	0.0802		-22.6885	-5.34125	0.0540891
1-2	0.00831293	8.79e-07	0.0490059	1.84e-06	8.53847	0.0772		-22.5902	-5.24117	0.0576353
nbs123	0.00840954	9.14e-07	0.0501332	1.52e-06	8.58343	0.0798
1-2	0.0083122	8.8e-07	0.0490052	1.87e-06	8.38457	0.0786		-22.5804	-5.23117	0.0555839
1-2	0.00831325	8.31e-07	0.0489976	1.6e-06	8.42299	0.0823		-22.7322	-5.38565	0.0519593
1-2	0.00830981	9.75e-07	0.0490012	1.51e-06	8.38809	0.084		-22.6602	-5.31237	0.0508237
nbs123	0.00840993	8.04e-07	0.0501415	1.34e-06	8.69673	0.084					-5.37503	0.236524
1-3	0.00830901	1.01e-06	0.0489963	1.79e-06	8.2428	0.079		-22.8317	-5.48701	0.0545892
1-3	0.00831102	9.42e-07	0.0489926	1.51e-06	8.15633	0.0905		-22.9057	-5.56231	0.0509434
1-3	0.0083117	8.35e-07	0.0489991	1.71e-06	8.17728	0.0881		-22.7771	-5.43139	0.053509
nbs123	0.00841008	8.88e-07	0.0501408	1.53e-06	8.62552	0.0768
1-3	0.00831096	8.96e-07	0.0489966	1.64e-06	8.0791	0.0879		-22.8731	-5.52915	0.0571781
1-3	0.00830863	9.25e-07	0.0489986	1.65e-06	8.1115	0.0862		-22.8317	-5.48693	0.0572969
1-3	0.0083099	8.5e-07	0.0490014	1.61e-06	8.13015	0.0838		-22.7762	-5.43051	0.0568199
nbs123	0.00841091	9.53e-07	0.0501462	1.75e-06	8.60584	0.0837
1-3	0.00831105	8.77e-07	0.049	1.71e-06	8.1161	0.0861		-22.8395	-5.49486	0.0582341
1-3	0.00831271	8.97e-07	0.0489992	1.6e-06	8.07615	0.0824		-22.8544	-5.51008	0.0569175
1-3	0.00831009	9.49e-07	0.0489984	1.69e-06	8.08084	0.0734		-22.8712	-5.52713	0.0579911
nbs123	0.00841168	7.83e-07	0.0501442	1.55e-06	8.63615	0.0828					-5.49548	0.0874325
1-4	0.00831172	9.27e-07	0.0490017	1.71e-06	8.17209	0.0801		-22.7372	-5.39083	0.0579981
1-4	0.00831046	9.76e-07	0.0490007	1.51e-06	8.18883	0.078		-22.757	-5.41092	0.0556383
1-4	0.00831106	7.39e-07	0.0490017	1.63e-06	8.14615	0.0816		-22.7362	-5.38981	0.0570307
nbs123	0.00841128	1.12e-06	0.0501393	1.73e-06	8.44051	0.0772
1-4	0.00831325	8.54e-07	0.0490026	1.56e-06	8.10057	0.0781		-22.7539	-5.40773	0.0587347
1-4	0.00831254	9.43e-07	0.0489985	1.74e-06	8.07025	0.0848		-22.836	-5.49135	0.0608058
1-4	0.00831156	8.03e-07	0.0489975	1.42e-06	8.10502	0.0846		-22.8558	-5.51145	0.0572381
nbs123	0.00841112	9.59e-07	0.0501479	1.77e-06	8.44161	0.08
1-4	0.00831113	1.04e-06	0.0490004	1.89e-06	8.14665	0.0828		-22.849	-5.50458	0.0615643
1-4	0.00831068	9.2e-07	0.0489977	1.5e-06	7.98721	0.0805		-22.9029	-5.55938	0.0569177
1-4	0.00831255	9.39e-07	0.0490019	1.6e-06	8.14089	0.0866		-22.8185	-5.47353	0.0580393
nbs123	0.00841519	8.55e-07	0.0501444	1.63e-06	8.60532	0.0871					-5.45995	0.123546
1-5	0.00831416	9.91e-07	0.0489965	1.86e-06	7.9244	0.0812		-22.8921	-5.54843	0.0591877
1-5	0.0083117	9.46e-07	0.0489998	1.93e-06	7.98773	0.0778		-22.8253	-5.48044	0.0601122
1-5	0.0083094	1.08e-06	0.0489979	1.81e-06	7.84902	0.0765		-22.8628	-5.5186	0.0585377
nbs123	0.00841123	8.39e-07	0.0501444	1.59e-06	8.51101	0.0797
1-5	0.00831079	8.22e-07	0.0489999	1.57e-06	8.11063	0.0781		-22.8619	-5.51767	0.0516075
1-5	0.00831041	1.04e-06	0.0490037	1.7e-06	8.08382	0.0833		-22.7867	-5.44116	0.0532935
1-5	0.00830977	9.04e-07	0.0490044	1.89e-06	8.16883	0.0782		-22.7737	-5.42797	0.0558946
nbs123	0.00841056	9.47e-07	0.0501484	1.26e-06	8.50081	0.0851
1-5	0.00831295	8.98e-07	0.0490007	1.71e-06	7.98502	0.0799		-22.8204	-5.47548	0.0536667
1-5	0.00831081	9.68e-07	0.048997	1.66e-06	8.11404	0.076		-22.8936	-5.54997	0.0530104
1-5	0.00831178	9.06e-07	0.048996	1.57e-06	8.09192	0.0777		-22.9141	-5.57087	0.0518561
nbs123	0.0084112	1e-06	0.0501417	1.61e-06	8.31616	0.0755					-5.5034	0.100136
nbs123	0.00841712	1.02e-06	0.0500213	1.62e-06	9.73867	0.123
1-6	0.00831776	8.88e-07	0.0488853	1.51e-06	9.01052	0.0923		-22.7834	-5.43779	0.0550072
1-6	0.00831874	7.67e-07	0.0488914	1.8e-06	9.03392	0.0977		-22.6616	-5.31389	0.0585417
1-6	0.00831864	7.57e-07	0.048888	1.56e-06	9.05027	0.0945		-22.729	-5.38245	0.055587
nbs123	0.00841945	7.08e-07	0.0500288	1.6e-06	9.63961	0.0968
1-6	0.00831702	8.86e-07	0.0488906	1.62e-06	9.1221	0.0973		-22.8056	-5.46039	0.0546254
1-6	0.00831843	8.29e-07	0.0488884	1.59e-06	9.19477	0.0953		-22.8494	-5.50494	0.0542563
1-6	0.00831788	9.58e-07	0.0488895	1.64e-06	9.1822	0.1		-22.8274	-5.48256	0.054875
nbs123	0.00841669	6.68e-07	0.0500344	1.47e-06	10.2056	0.0815
1-6	0.00832095	7.67e-07	0.0488947	1.32e-06	9.16219	0.0915		-22.7521	-5.40593	0.0510094
1-6	0.00831931	9.28e-07	0.04889	1.48e-06	9.27243	0.0969		-22.8446	-5.50011	0.052816
1-6	0.00831901	7.46e-07	0.0488796	1.7e-06	9.07414	0.0911		-23.0521	-5.71125	0.0555224
nbs123	0.00841828	7.11e-07	0.0500317	1.59e-06	9.58765	0.0975					-5.46659	0.22097
1-7	0.00832128	8.87e-07	0.0488938	1.3e-06	9.28379	0.0922		-22.8008	-5.45554	0.0490133
1-7	0.00831708	8.19e-07	0.0488906	1.51e-06	9.05995	0.0969		-22.8646	-5.52043	0.0514711
1-7	0.00831941	8.82e-07	0.0488912	1.67e-06	9.15659	0.0911		-22.853	-5.50863	0.0534987
nbs123	0.00841763	7.15e-07	0.0500375	1.31e-06	9.52704	0.101
1-7	0.00831954	8.08e-07	0.0488936	1.69e-06	9.34891	0.0951		-22.8235	-5.4786	0.0534067
1-7	0.00832046	8.14e-07	0.0488997	1.52e-06	9.2922	0.0989		-22.7002	-5.35309	0.0512227
1-7	0.00832116	7.85e-07	0.0488937	1.32e-06	9.26866	0.0909		-22.8213	-5.47636	0.0488508
nbs123	0.0084195	7.02e-07	0.0500336	1.56e-06	9.70265	0.0858
1-7	0.00831663	8.82e-07	0.048892	1.62e-06	9.19256	0.0985		-22.8821	-5.53827	0.0537276
1-7	0.00831879	1.01e-06	0.0488972	1.66e-06	9.19003	0.0986		-22.7778	-5.43209	0.0542337
1-7	0.0083181	9.65e-07	0.0488982	1.43e-06	9.04937	0.0907		-22.7582	-5.41216	0.05142
nbs123	0.00841788	8.31e-07	0.0500403	1.43e-06	9.67112	0.097					-5.46391	0.116479
1-8	0.00831675	9.05e-07	0.0488862	1.79e-06	8.56459	0.0445		-23.0687	-5.72817	0.0556074
1-8	0.00832037	8.67e-07	0.0489071	1.78e-06	9.24656	0.0917		-22.65	-5.30208	0.0554627
1-8	0.00831611	8.32e-07	0.0489077	1.41e-06	9.26309	0.083		-22.6373	-5.28906	0.0508196
nbs123	0.00841904	8.69e-07	0.0500408	1.53e-06	9.60638	0.0919
1-8	0.00831655	8.15e-07	0.0489009	1.65e-06	9.15293	0.0762		-22.6893	-5.34201	0.0529284
1-8	0.00831585	8.31e-07	0.0489006	1.55e-06	9.2578	0.0892		-22.6955	-5.34832	0.0516489
1-8	0.00832028	9.88e-07	0.0489039	1.79e-06	9.31657	0.0905		-22.6293	-5.28099	0.0547964
nbs123	0.00841916	8.27e-07	0.0500316	1.35e-06	9.65036	0.0908
1-8	0.00831635	9.23e-07	0.0489038	1.59e-06	9.2559	0.0891		-22.5958	-5.24684	0.0528668
1-8	0.00831782	7.84e-07	0.0489021	1.71e-06	9.34563	0.0859		-22.6297	-5.28142	0.0544111
1-8	0.00831803	8.9e-07	0.0489028	1.55e-06	9.23234	0.0886		-22.6162	-5.26759	0.0523682
nbs123	0.00841604	7.72e-07	0.0500372	1.59e-06	9.61377	0.11					-5.34294	0.296258
1-9	0.00831844	8.38e-07	0.0489018	1.44e-06	9.22974	0.0892		-22.6762	-5.32869	0.0511433
1-9	0.00831845	8.81e-07	0.0489024	1.69e-06	9.12116	0.0826		-22.6644	-5.31669	0.0542478
1-9	0.00831736	8.83e-07	0.0489012	1.6e-06	9.12603	0.087		-22.6878	-5.34048	0.0530948
nbs123	0.008416	7.6e-07	0.0500357	1.36e-06	9.65484	0.0849
1-9	0.00831842	8.02e-07	0.0489015	1.79e-06	9.26698	0.0862		-22.6882	-5.34094	0.0562673
1-9	0.00831989	9.64e-07	0.0489034	1.56e-06	9.32963	0.082		-22.6509	-5.30291	0.0533266
1-9	0.00832069	8.78e-07	0.0489045	1.64e-06	9.21609	0.0854		-22.6283	-5.27992	0.0543205
nbs123	0.00841966	8.13e-07	0.0500378	1.65e-06	9.6571	0.0966
1-9	0.00832025	8.67e-07	0.0489015	1.64e-06	9.33747	0.0903		-22.6711	-5.32355	0.0563185
1-9	0.00831641	8.43e-07	0.0489052	1.85e-06	9.22287	0.0898		-22.5982	-5.24931	0.0589749
1-9	0.00832023	6.6e-07	0.048901	1.6e-06	9.32157	0.0854		-22.6803	-5.3329	0.0558354
nbs123	0.00841897	8.2e-07	0.0500339	1.55e-06	9.63306	0.0907					-5.31282	0.0614654
1-10	0.00831839	7.93e-07	0.048897	1.68e-06	9.13448	0.0799		-22.7217	-5.37503	0.0568128
1-10	0.00831619	8.46e-07	0.0488939	1.58e-06	9.29566	0.0891		-22.7825	-5.43687	0.055601
1-10	0.00831733	8.25e-07	0.0488923	1.61e-06	9.24425	0.0844		-22.8147	-5.46962	0.0559605
nbs123	0.0084175	9.49e-07	0.0500338	1.65e-06	9.48459	0.0891
1-10	0.00831544	8.11e-07	0.048898	1.67e-06	9.15777	0.0872		-22.8401	-5.49553	0.0567936
1-10	0.00831669	8.58e-07	0.0489028	1.54e-06	8.89179	0.0887		-22.7422	-5.39588	0.0552339
1-10	0.00831684	8.06e-07	0.0488953	1.7e-06	9.03568	0.0944		-22.8925	-5.54882	0.0571658
nbs123	0.0084167	7.94e-07	0.050048	1.56e-06	9.55199	0.0905
1-10	0.00831965	9.04e-07	0.0489017	1.92e-06	8.91146	0.076		-22.8611	-5.51693	0.0590327
1-10	0.0083211	7.92e-07	0.0488997	1.59e-06	9.29301	0.0856		-22.9015	-5.55801	0.0547775
1-10	0.00831816	8.75e-07	0.0488975	1.5e-06	9.20926	0.0888		-22.9455	-5.60275	0.0537062
nbs123	0.00841737	6.5e-07	0.0500436	1.56e-06	9.57992	0.0892					-5.48883	0.153066
1-11	0.00832027	9.25e-07	0.0489028	1.69e-06	9.15303	0.0868		-22.7479	-5.40167	0.0569228
1-11	0.0083198	8.38e-07	0.048898	1.56e-06	9.24874	0.0914		-22.8438	-5.49929	0.055351
1-11	0.00832043	8.08e-07	0.0489015	1.63e-06	9.1943	0.0834		-22.7743	-5.42851	0.0561869
nbs123	0.00841688	8.26e-07	0.0500386	1.64e-06	9.63379	0.0898
1-11	0.00832089	8.3e-07	0.0489036	1.65e-06	9.09857	0.0871		-22.7821	-5.43649	0.0567612
1-11	0.0083179	9.69e-07	0.0489026	1.6e-06	9.28203	0.0927		-22.8021	-5.45683	0.0561598
1-11	0.00831462	8.21e-07	0.0489024	1.48e-06	9.14035	0.0835		-22.8061	-5.46089	0.0547667
nbs123	0.00841905	7.26e-07	0.0500487	1.59e-06	9.47678	0.0881
1-11	0.00831842	9.18e-07	0.0489013	1.59e-06	8.89493	0.0882		-22.8798	-5.5359	0.0556909
1-11	0.00831656	8.67e-07	0.0489022	1.57e-06	8.97957	0.0969		-22.8626	-5.51841	0.0554528
1-11	0.0083191	8.05e-07	0.0489057	1.72e-06	9.0217	0.0921		-22.7919	-5.44642	0.0572817
nbs123	0.00841708	7.88e-07	0.050044	1.61e-06	9.42979	0.0967					-5.46493	0.0884275
1-12	0.00831874	7.95e-07	0.0489009	1.96e-06	8.80298	0.0893		-22.7872	-5.44171	0.0608493
1-12	0.00831889	9.07e-07	0.0489023	1.45e-06	8.85236	0.094		-22.7579	-5.41181	0.0545466
1-12	0.00831721	8.95e-07	0.0488988	1.54e-06	8.77267	0.0888		-22.8282	-5.4834	0.0555697
nbs123	0.00841695	7.44e-07	0.0500383	1.63e-06	9.40069	0.0871
1-12	0.00831628	9.38e-07	0.0489034	1.42e-06	8.84288	0.0846		-22.7281	-5.3815	0.0533973
1-12	0.00832024	8.67e-07	0.0489042	1.41e-06	8.94712	0.0893		-22.7125	-5.36564	0.0532861
1-12	0.00831781	8.85e-07	0.0489043	1.69e-06	8.83752	0.0884		-22.7101	-5.3632	0.0565892
nbs123	0.00841669	8.77e-07	0.0500432	1.54e-06	9.43492	0.0926
1-12	0.00831805	8.58e-07	0.0489017	1.6e-06	8.8923	0.0877		-22.7816	-5.43594	0.0558389
1-12	0.00831815	7.59e-07	0.0489028	1.59e-06	8.90459	0.0863		-22.7594	-5.41337	0.0557188
1-12	0.00831844	8.21e-07	0.0489022	1.75e-06	8.71842	0.0788		-22.7726	-5.42679	0.0576895
nbs123	0.00841528	6.95e-07	0.0500404	1.66e-06	9.51806	0.0896					-5.4137	0.0781335
1-13	0.00831779	9.26e-07	0.0489009	1.78e-06	8.75214	0.0802		-22.7802	-5.43452	0.0594907
1-13	0.00831717	8.1e-07	0.0489001	1.63e-06	8.8997	0.0955		-22.7968	-5.4514	0.0576653
1-13	0.00831527	8.52e-07	0.0489074	1.6e-06	8.99098	0.0965		-22.6503	-5.30232	0.05731
nbs123	0.00841823	7.92e-07	0.0500414	1.67e-06	9.39723	0.101
1-13	0.00831721	9.37e-07	0.0489025	1.51e-06	8.81909	0.0873		-22.8444	-5.4999	0.0551239
1-13	0.00831562	7.93e-07	0.0489057	1.61e-06	8.81797	0.0878		-22.7803	-5.43462	0.0562936
1-13	0.00831601	8.36e-07	0.0489063	1.46e-06	8.96344	0.09		-22.7677	-5.42181	0.0545565
nbs123	0.00841615	8.93e-07	0.05005	1.56e-06	9.64371	0.0957
1-13	0.00831716	9.68e-07	0.0489045	1.5e-06	8.83298	0.0946		-22.8039	-5.45869	0.053358
1-13	0.0083136	8.29e-07	0.0489066	1.77e-06	8.94715	0.0924		-22.7632	-5.4172	0.0567109
1-13	0.00831612	8.88e-07	0.0489055	1.57e-06	8.8446	0.0881		-22.7857	-5.44018	0.0541931
nbs123	0.00841548	8.61e-07	0.0500416	1.53e-06	9.3107	0.0923					-5.42896	0.106855
1-14	0.00831545	9.51e-07	0.0489017	1.71e-06	9.04189	0.0834		-22.8185	-5.4735	0.0562758
1-14	0.00831892	8.49e-07	0.0489038	1.7e-06	8.8732	0.092		-22.7763	-5.43059	0.056148
1-14	0.00831809	8.18e-07	0.0489067	1.65e-06	8.9381	0.0973		-22.7198	-5.37304	0.0555196
nbs123	0.00841385	7.78e-07	0.0500458	1.59e-06	8.92511	0.0882
1-14	0.00831786	7.96e-07	0.048901	1.85e-06	8.93338	0.0904		-22.8223	-5.47741	0.0579938
1-14	0.00831644	7.95e-07	0.0489018	1.81e-06	8.75821	0.0878		-22.8069	-5.46175	0.0574632
1-14	0.00831681	8.7e-07	0.0489072	1.54e-06	8.91582	0.0979		-22.7	-5.35294	0.05407
nbs123	0.00841446	8.8e-07	0.0500405	1.52e-06	9.22537	0.0896
1-14	0.00831704	7.94e-07	0.0489004	1.76e-06	8.71516	0.0807		-22.7368	-5.39035	0.0562614
1-14	0.00831728	8.83e-07	0.0489036	1.43e-06	8.93089	0.0892		-22.6718	-5.32425	0.0522015
1-14	0.00831732	7.68e-07	0.0489	1.46e-06	8.84945	0.0982		-22.7442	-5.39788	0.0525489
nbs123	0.00841575	8.26e-07	0.0500357	1.54e-06	9.2701	0.0876					-5.40908	0.109951
1-15	0.00831758	8.8e-07	0.0489031	1.4e-06	8.7346	0.0837		-22.6567	-5.30889	0.0506052
1-15	0.00831895	8.63e-07	0.0489009	1.58e-06	8.60028	0.0921		-22.7009	-5.35384	0.0527757
1-15	0.00831509	9.65e-07	0.0489022	1.67e-06	8.83138	0.0975		-22.6743	-5.32679	0.0539215
nbs123	0.00841517	7.57e-07	0.0500379	1.41e-06	9.16239	0.0924
1-15	0.0083138	9.23e-07	0.0489029	1.74e-06	8.71892	0.0885		-22.7461	-5.39981	0.0543914
1-15	0.00831576	8.97e-07	0.0489062	1.57e-06	8.72132	0.0841		-22.6797	-5.33229	0.0521823
1-15	0.00831606	8.16e-07	0.0489035	1.81e-06	8.75162	0.0915		-22.7347	-5.38822	0.0553381
nbs123	0.00841328	7.85e-07	0.0500445	1.5e-06	9.2673	0.0909
1-15	0.00831471	8.95e-07	0.0488904	1.78e-06	8.5499	0.0835		-22.9996	-5.65783	0.0577737
1-15	0.00831498	8.3e-07	0.0489025	1.59e-06	8.55376	0.0861		-22.758	-5.41194	0.0554021
1-15	0.00831706	7.83e-07	0.0489026	1.58e-06	8.76185	0.0899		-22.7564	-5.41031	0.0552824
nbs123	0.00841442	8.03e-07	0.0500382	1.67e-06	9.14383	0.0908					-5.39888	0.208838
1-16	0.00831594	7.15e-07	0.0489036	1.69e-06	8.45674	0.079		-22.7228	-5.37617	0.0586099
1-16	0.00831511	8.43e-07	0.0488952	1.73e-06	8.5398	0.0837		-22.8907	-5.54701	0.0590995
1-16	0.00831706	8.85e-07	0.0488981	1.72e-06	8.60066	0.0821		-22.8311	-5.4864	0.058976
nbs123	0.00841238	8.79e-07	0.050043	1.68e-06	9.13524	0.0888
1-16	0.00831661	7.76e-07	0.0489035	1.58e-06	8.66579	0.0887		-22.738	-5.39161	0.0586193
1-16	0.00831623	7.99e-07	0.0489023	1.88e-06	8.60646	0.0845		-22.7612	-5.41521	0.0622119
1-16	0.0083159	9.78e-07	0.048901	1.73e-06	8.78419	0.083		-22.7866	-5.44104	0.0603651
nbs123	0.00841436	7.19e-07	0.0500396	1.78e-06	9.27628	0.0927
1-16	0.008315	8.86e-07	0.0489028	1.64e-06	8.6688	0.0897		-22.8557	-5.51135	0.0596418
1-16	0.00831546	8.12e-07	0.0489055	1.56e-06	8.70748	0.0896		-22.8019	-5.45664	0.0587365
1-16	0.00831568	9.38e-07	0.0489052	1.38e-06	8.67889	0.0884		-22.8075	-5.46234	0.0568219
nbs123	0.00841501	9.49e-07	0.0500538	1.71e-06	8.89372	0.0914					-5.4542	0.111105
1-17	0.00831403	8.9e-07	0.0489035	1.43e-06	8.57678	0.0909		-22.9629	-5.62051	0.0521315
1-17	0.00831645	8.9e-07	0.0489054	1.58e-06	8.77957	0.0839		-22.925	-5.58188	0.053911
1-17	0.00831569	9.25e-07	0.0489023	1.7e-06	8.72293	0.0889		-22.9879	-5.64593	0.0554177
nbs123	0.00841468	6.85e-07	0.0500519	1.32e-06	9.18478	0.0899
1-17	0.00831756	1.01e-06	0.048906	1.83e-06	8.64925	0.0894		-22.7319	-5.38538	0.0568903
1-17	0.00831656	1e-06	0.0489073	1.6e-06	8.75252	0.0867		-22.7047	-5.35773	0.053913
1-17	0.00831686	9.95e-07	0.0489072	1.55e-06	8.67228	0.087		-22.7085	-5.36159	0.0532989
nbs123	0.00841491	7.8e-07	0.0500352	1.69e-06	9.32035	0.0822
1-17	0.00831738	8.8e-07	0.0489077	1.73e-06	8.67119	0.087		-22.6667	-5.319	0.059433
1-17	0.00831769	8.46e-07	0.0489022	1.82e-06	8.49335	0.0856		-22.777	-5.43127	0.0605489
1-17	0.0083163	9.54e-07	0.048901	1.77e-06	8.43225	0.0739		-22.8	-5.45465	0.0599263
nbs123	0.00841711	8.06e-07	0.0500488	1.69e-06	9.15576	0.0865					-5.46199	0.246575
1-18	0.00831735	8.56e-07	0.0489064	1.58e-06	8.64577	0.0849		-22.7623	-5.4163	0.0566233
1-18	0.00831382	7.94e-07	0.0489089	1.79e-06	8.71117	0.0886		-22.7123	-5.36546	0.0591772
1-18	0.0083143	8.34e-07	0.0489025	1.64e-06	8.56847	0.0865		-22.8406	-5.49602	0.0573337
nbs123	0.00841475	8.44e-07	0.0500423	1.6e-06	8.9984	0.0791
1-18	0.00831451	9.07e-07	0.0489038	1.78e-06	8.41888	0.089		-22.7318	-5.38529	0.0581571
1-18	0.00831647	8.99e-07	0.0489075	1.51e-06	8.72736	0.0868		-22.6589	-5.31105	0.0548696
1-18	0.00831795	7.91e-07	0.0489051	1.45e-06	8.64296	0.0856		-22.707	-5.36007	0.0541896
nbs123	0.00841636	7.42e-07	0.0500404	1.61e-06	9.03724	0.0858
1-18	0.00831887	9.27e-07	0.048904	1.78e-06	8.66564	0.0824		-22.7735	-5.42773	0.0580458
1-18	0.0083156	8.91e-07	0.0489049	1.7e-06	8.71746	0.0855		-22.7563	-5.41024	0.0570339
1-18	0.00831509	9e-07	0.0489041	1.74e-06	8.70566	0.086		-22.7721	-5.42631	0.0575364
nbs123	0.00841556	8.84e-07	0.0500469	1.59e-06	8.92449	0.0817					-5.39983	0.104803
1-19	0.00831686	9.63e-07	0.0489051	1.46e-06	8.66923	0.083		-22.8658	-5.52163	0.0539419
1-19	0.00831831	8.21e-07	0.0489038	1.96e-06	8.64765	0.086		-22.8925	-5.54887	0.0602062
1-19	0.00832178	8.28e-07	0.0489095	1.63e-06	8.49647	0.0876		-22.777	-5.43134	0.0559389
nbs123	0.00841879	8.52e-07	0.0500521	1.59e-06	9.1214	0.09
1-19	0.00831621	7.85e-07	0.0489071	1.5e-06	8.62331	0.084		-22.9108	-5.5675	0.0543949
1-19	0.00831622	8.16e-07	0.0489076	1.73e-06	8.53141	0.0898		-22.9004	-5.55693	0.0571784
1-19	0.0083168	9.28e-07	0.0489084	1.62e-06	8.7338	0.0945		-22.8835	-5.53964	0.0558146
nbs123	0.00841843	7.5e-07	0.0500556	1.59e-06	9.18664	0.0828
1-19	0.00831751	8.85e-07	0.0489065	1.68e-06	8.75173	0.0884		-22.8675	-5.52337	0.0544097
1-19	0.00831796	9.27e-07	0.0489101	1.85e-06	8.69899	0.0815		-22.7955	-5.45017	0.0566665
1-19	0.0083165	8.62e-07	0.0489093	1.77e-06	8.6094	0.0869		-22.8107	-5.46562	0.0555885
nbs123	0.0084158	8.69e-07	0.0500464	1.39e-06	9.17532	0.085					-5.51167	0.0998083
1-20	0.0083153	8.98e-07	0.0489051	1.67e-06	8.48682	0.0787		-22.8426	-5.49807	0.055234
1-20	0.00831685	7.97e-07	0.0489049	1.65e-06	8.48572	0.085		-22.8464	-5.50193	0.0549822
1-20	0.0083153	8.94e-07	0.0489061	1.51e-06	8.5818	0.0865		-22.8222	-5.47733	0.0532731
nbs123	0.00841241	8.28e-07	0.0500503	1.67e-06	9.23497	0.0862
1-20	0.00831724	9.09e-07	0.0489085	1.98e-06	8.46637	0.0764		-22.7997	-5.45436	0.0629359
1-20	0.00831517	1.04e-06	0.0489088	1.51e-06	8.60722	0.0876		-22.7949	-5.44948	0.0572292
1-20	0.00831501	9.59e-07	0.0489047	1.77e-06	8.47472	0.0882		-22.8762	-5.53224	0.0602653
nbs123	0.00841541	7.8e-07	0.050049	1.74e-06	8.96889	0.0887
1-20	0.0083156	8.53e-07	0.0489088	1.67e-06	8.44305	0.0861		-22.8122	-5.46714	0.0573123
1-20	0.00831585	8.36e-07	0.0489084	1.69e-06	8.38836	0.0858		-22.8208	-5.47589	0.0575571
1-20	0.00831582	8.64e-07	0.0489085	1.7e-06	8.36898	0.0847		-22.8178	-5.47284	0.05768
nbs123	0.00841655	7.66e-07	0.0500522	1.51e-06	8.97854	0.0819					-5.48103	0.0517537
2-1	0.00831637	8.93e-07	0.048908	1.46e-06	8.70444	0.0827		-22.7732	-5.42747	0.052424
2-1	0.00831491	9.52e-07	0.0489071	1.58e-06	8.49631	0.0902		-22.7906	-5.44516	0.0538593
2-1	0.00831398	9.12e-07	0.0489103	1.52e-06	8.49186	0.0897		-22.7283	-5.38172	0.0531313
nbs123	0.00841397	8.32e-07	0.0500434	1.54e-06	8.94134	0.0875
2-1	0.00831628	8.87e-07	0.0489008	1.48e-06	8.31172	0.0899		-22.881	-5.53712	0.0528917
2-1	0.00831651	8.64e-07	0.048907	1.66e-06	8.51656	0.0902		-22.7581	-5.41206	0.0550781
2-1	0.00831699	9.21e-07	0.0489088	1.79e-06	8.28583	0.0813		-22.7205	-5.37382	0.0567539
nbs123	0.00841553	7.89e-07	0.0500485	1.53e-06	8.88626	0.0794
2-1	0.00831604	7.99e-07	0.048907	1.5e-06	8.3161	0.0876		-22.8191	-5.47416	0.05479
2-1	0.00831615	9.7e-07	0.0489053	1.51e-06	8.38272	0.0856		-22.8519	-5.50751	0.0549053
2-1	0.00831786	8.78e-07	0.0489046	1.79e-06	8.51501	0.0862		-22.8659	-5.52174	0.0583178
nbs123	0.00841396	8.11e-07	0.0500496	1.68e-06	8.92494	0.0851					-5.45342	0.120333
2-2	0.00831706	8.63e-07	0.0489014	1.65e-06	8.6016	0.0846		-22.9259	-5.58283	0.0576708
2-2	0.00831471	7.17e-07	0.0489065	1.77e-06	8.43056	0.0841		-22.8248	-5.47994	0.0591377
2-2	0.0083168	8.18e-07	0.0488956	1.76e-06	8.3587	0.0762		-23.0436	-5.70261	0.0590177
nbs123	0.00841134	8.15e-07	0.0500481	1.63e-06	8.87755	0.0801
2-2	0.0083194	8.42e-07	0.0489093	1.67e-06	8.51231	0.0881		-22.734	-5.38754	0.0599423
2-2	0.00832022	9.55e-07	0.0489096	1.77e-06	8.60271	0.0882		-22.7268	-5.38022	0.0611299
2-2	0.00831903	9.85e-07	0.0489021	1.51e-06	8.11611	0.0774		-22.8781	-5.53416	0.0581434
nbs123	0.00841565	9.16e-07	0.050046	1.85e-06	8.7378	0.0829
2-2	0.00831877	9.47e-07	0.048905	1.74e-06	8.33412	0.0845		-22.7839	-5.43829	0.061533
2-2	0.00831791	7.7e-07	0.048912	1.7e-06	8.45702	0.0871		-22.645	-5.29695	0.0610609
2-2	0.00831978	8.56e-07	0.0489169	1.5e-06	8.576	0.0834		-22.5477	-5.19791	0.0588279
nbs123	0.00841749	8.28e-07	0.0500446	1.7e-06	8.75524	0.0895					-5.44449	0.304175
2-3	0.00831664	9.08e-07	0.048913	1.59e-06	8.43637	0.0844		-22.5896	-5.24054	0.0575413
2-3	0.00832037	8.06e-07	0.0489091	1.74e-06	8.46352	0.0837		-22.6659	-5.31823	0.0593294
2-3	0.00831839	8.79e-07	0.0489112	1.63e-06	8.46937	0.0871		-22.6251	-5.27674	0.058008
nbs123	0.00841898	8.64e-07	0.0500423	1.66e-06	8.81457	0.0804
2-3	0.00832143	8.19e-07	0.0489105	1.34e-06	8.54051	0.0828		-22.6421	-5.29397	0.0534827
2-3	0.00831828	9.62e-07	0.0489059	1.79e-06	8.6311	0.0886		-22.7336	-5.38711	0.0587319
2-3	0.00831732	8.7e-07	0.0489084	1.83e-06	8.57819	0.0899		-22.683	-5.33566	0.0592438
nbs123	0.00841477	8.17e-07	0.0500448	1.59e-06	8.8824	0.0837
2-3	0.00831728	9.1e-07	0.0489084	1.78e-06	8.62017	0.085		-22.7277	-5.38107	0.0567483
2-3	0.00831589	9.64e-07	0.0489072	1.59e-06	8.58116	0.0948		-22.7528	-5.40669	0.0543391
2-3	0.0083181	7.67e-07	0.048914	1.66e-06	8.52355	0.0915		-22.6164	-5.26779	0.0552045
nbs123	0.00841711	8.3e-07	0.0500469	1.49e-06	8.92673	0.0868					-5.32309	0.117257
2-4	0.00831833	8.85e-07	0.0489064	1.88e-06	8.41729	0.0799		-22.8469	-5.50243	0.0565976
2-4	0.0083182	9.06e-07	0.0489088	1.61e-06	8.27605	0.0803		-22.7999	-5.45464	0.0530021
2-4	0.00831921	8.99e-07	0.0489062	1.84e-06	8.39594	0.0767		-22.8505	-5.50609	0.0560454
nbs123	0.00841737	8.96e-07	0.0500529	1.45e-06	8.92473	0.0847
2-4	0.00831775	8.83e-07	0.0489006	1.65e-06	8.31879	0.0766		-22.903	-5.55958	0.0550072
2-4	0.00831512	8.76e-07	0.0489103	1.75e-06	8.41487	0.078		-22.7092	-5.36232	0.0562802
2-4	0.00831662	8.47e-07	0.0489097	1.67e-06	8.37417	0.0874		-22.722	-5.37533	0.0552551
nbs123	0.00841677	7.78e-07	0.0500408	1.62e-06	8.96823	0.0843
2-4	0.00831785	8.15e-07	0.0489069	1.61e-06	8.247	0.0788		-22.7525	-5.40631	0.0580371
2-4	0.0083161	9.65e-07	0.0489109	1.53e-06	8.46656	0.0783		-22.6727	-5.32517	0.0571237
2-4	0.00831608	9.25e-07	0.0489105	1.75e-06	8.3526	0.0869		-22.6809	-5.33351	0.0597058
nbs123	0.00841596	8.55e-07	0.0500504	1.76e-06	8.98893	0.068					-5.42504	0.16829
2-5	0.00831618	8.82e-07	0.0489106	1.57e-06	8.43332	0.0859		-22.8337	-5.48895	0.0561511
2-5	0.00831617	8.44e-07	0.0488939	1.82e-06	8.24615	0.0721		-23.1677	-5.82893	0.0592297
2-5	0.00831572	8.58e-07	0.0489105	1.67e-06	8.39391	0.0825		-22.8365	-5.4918	0.0573445
nbs123	0.00841623	8.43e-07	0.0500566	1.49e-06	8.94464	0.0824
2-5	0.0083162	8.5e-07	0.0489091	1.64e-06	8.50502	0.0755		-22.9062	-5.56278	0.0557695
2-5	0.00831587	9.39e-07	0.0489101	1.56e-06	8.45404	0.0784		-22.8862	-5.54245	0.0548012
2-5	0.00831774	8.94e-07	0.0489121	1.61e-06	8.3696	0.0847		-22.8453	-5.50077	0.0554016
nbs123	0.00841543	9.59e-07	0.0500547	1.66e-06	8.90302	0.0843
2-5	0.00831659	8e-07	0.048908	1.65e-06	8.45718	0.0816		-22.9492	-5.60658	0.0580027
2-5	0.00831734	9.1e-07	0.0489081	1.54e-06	8.4795	0.0818		-22.9474	-5.60475	0.056724
2-5	0.00831886	8.3e-07	0.0489122	1.57e-06	8.60905	0.0837		-22.8669	-5.52281	0.0570652
nbs123	0.0084152	7.25e-07	0.0500589	1.68e-06	8.75666	0.0901					-5.5722	0.212201
2-6	0.00831721	8.5e-07	0.0489072	1.66e-06	7.88575	0.0756		-22.8997	-5.55612	0.0584689
2-6	0.00831658	7.58e-07	0.0489142	1.64e-06	8.299	0.0799		-22.7588	-5.41277	0.0582297
2-6	0.00831932	9.28e-07	0.0489119	1.83e-06	8.44161	0.0836		-22.806	-5.46076	0.0605507
nbs123	0.00841642	7.64e-07	0.0500479	1.69e-06	9.06484	0.084
2-6	0.00831577	8.43e-07	0.0489116	1.49e-06	8.43282	0.0823		-22.5668	-5.21732	0.113078
2-6	0.00831728	9.18e-07	0.048913	1.51e-06	8.36961	0.0854		-22.5394	-5.18945	0.113189
2-6	0.00831673	9.78e-07	0.0489086	1.48e-06	8.32812	0.0864		-22.6269	-5.27854	0.113024
nbs123	0.00841256	1.44e-06	0.0500338	5.18e-06	8.44808	0.249
2-6	0.00831692	9.56e-07	0.0489145	1.57e-06	8.49007	0.0879		-22.5734	-5.22403	0.112894
2-6	0.00832033	8.57e-07	0.0489134	1.74e-06	8.33418	0.0789		-22.5957	-5.24681	0.113931
2-6	0.00831748	7.67e-07	0.0489123	1.69e-06	8.38898	0.073		-22.6169	-5.26836	0.113616
nbs123	0.0084167	8.12e-07	0.0500545	1.58e-06	8.90882	0.0816					-5.31713	0.255573
2-7	0.00831658	8.17e-07	0.0489109	1.61e-06	8.41708	0.0792		-22.8794	-5.5355	0.0534986
2-7	0.00831615	8.78e-07	0.0489139	1.47e-06	8.40318	0.0842		-22.8205	-5.47552	0.0517856
2-7	0.00831683	9.13e-07	0.0489099	1.35e-06	8.21422	0.0757		-22.9002	-5.55665	0.0504027
nbs123	0.00841514	9.66e-07	0.0500578	1.4e-06	8.60015	0.117
2-7	0.00831557	9.01e-07	0.0489118	1.59e-06	8.41503	0.0842		-22.8214	-5.4765	0.0553305
2-7	0.00831697	8.5e-07	0.0489075	1.54e-06	8.39684	0.0789		-22.9061	-5.56272	0.0547378
2-7	0.00831532	8.21e-07	0.0489145	1.68e-06	8.42977	0.0764		-22.7659	-5.41998	0.05643
nbs123	0.00841297	8.55e-07	0.0500503	1.75e-06	9.0618	0.094
2-7	0.00831573	9.11e-07	0.0489126	1.49e-06	8.41473	0.0826		-22.7503	-5.40408	0.0559858
2-7	0.00831609	9.02e-07	0.0489059	1.67e-06	8.08645	0.0844		-22.8845	-5.54073	0.058073
2-7	0.00831786	9.37e-07	0.0489123	1.63e-06	8.30772	0.0791		-22.7571	-5.411	0.0575934
nbs123	0.00841428	8.64e-07	0.0500522	1.57e-06	8.8444	0.0791					-5.48697	0.128858
2-8	0.0083147	8.07e-07	0.0489141	1.54e-06	8.36338	0.0796		-22.7449	-5.39864	0.0510767
2-8	0.00831699	7.72e-07	0.0489152	1.8e-06	8.3864	0.0888		-22.7217	-5.37505	0.0545135
2-8	0.00831763	9.75e-07	0.0489122	1.41e-06	8.27166	0.0807		-22.7819	-5.43626	0.0494834
nbs123	0.00841515	9.33e-07	0.0500528	1.26e-06	8.71997	0.0847
2-8	0.00831903	8.99e-07	0.0489147	1.84e-06	8.25704	0.0766		-22.7493	-5.40311	0.0559942
2-8	0.0083145	9.7e-07	0.0489112	1.76e-06	8.05519	0.0826		-22.8192	-5.47428	0.0549106
2-8	0.00831715	8.56e-07	0.0489152	1.56e-06	8.30837	0.0845		-22.7397	-5.39335	0.0523206
nbs123	0.00841641	7.19e-07	0.050054	1.65e-06	8.69825	0.0836
2-8	0.00831457	9.31e-07	0.0489158	1.75e-06	8.20777	0.0791		-22.7182	-5.37143	0.0581009
2-8	0.00831823	1.02e-06	0.0489094	1.82e-06	8.26684	0.0837		-22.8444	-5.49994	0.0589958
2-8	0.00831498	9.7e-07	0.0489221	1.49e-06	8.27763	0.0819		-22.5909	-5.24191	0.0549855
nbs123	0.00841376	9.42e-07	0.0500517	1.59e-06	8.6177	0.0845					-5.39933	0.147145
2-9	0.00831749	8.63e-07	0.0489157	1.71e-06	8.24748	0.0807		-22.7524	-5.40622	0.0572588
2-9	0.0083168	7.68e-07	0.048919	1.66e-06	8.32747	0.0754		-22.6864	-5.33912	0.0566392
2-9	0.00831806	9.69e-07	0.0489176	1.59e-06	8.30551	0.0838		-22.7144	-5.36759	0.0557942
nbs123	0.00841723	8.48e-07	0.0500575	1.62e-06	8.57627	0.0835
2-9	0.00831587	8.61e-07	0.0489181	1.84e-06	8.1292	0.0726		-22.7697	-5.42389	0.0615144
2-9	0.00831627	1.04e-06	0.0489099	1.62e-06	8.18907	0.0817		-22.9341	-5.59122	0.0588753
2-9	0.00831751	9.53e-07	0.0489124	1.86e-06	8.20621	0.0723		-22.8832	-5.53937	0.061768
nbs123	0.00841491	9.1e-07	0.0500584	1.82e-06	8.63104	0.116
2-9	0.00831086	9.11e-07	0.0488949	1.77e-06	7.9291	0.0713		-23.1271	-5.78761	0.0600328
2-9	0.00831604	7.92e-07	0.0489142	1.69e-06	8.15919	0.0853		-22.7429	-5.3966	0.0590527
2-9	0.00831702	1e-06	0.0489182	1.69e-06	8.10269	0.0761		-22.6632	-5.31547	0.059051
nbs123	0.00841237	8.72e-07	0.0500467	1.56e-06	8.60637	0.0801					-5.46301	0.302509
2-10	0.0083155	9.49e-07	0.0489096	1.77e-06	8.01921	0.0808		-22.7908	-5.4453	0.0555527
2-10	0.00831523	9.02e-07	0.048915	1.6e-06	8.15403	0.0808		-22.6827	-5.33529	0.0533514
2-10	0.00831317	8.72e-07	0.0489112	1.54e-06	8.18279	0.0809		-22.7594	-5.41338	0.0526098
nbs123	0.00841458	7.56e-07	0.050054	1.42e-06	8.76275	0.0836
2-10	0.0083164	9.36e-07	0.0489136	1.56e-06	8.23405	0.0734		-22.7722	-5.42636	0.0538103
2-10	0.00831774	9.96e-07	0.048909	1.62e-06	8.19856	0.0788		-22.8653	-5.52111	0.0545482
2-10	0.00831616	9.89e-07	0.0489059	1.79e-06	8.12937	0.0895		-22.9262	-5.58313	0.0567275
nbs123	0.00841655	9.59e-07	0.0500529	1.64e-06	8.72529	0.0886
2-10	0.00831397	9.67e-07	0.0489105	1.51e-06	8.11049	0.0806		-22.8431	-5.49855	0.053642
2-10	0.00831556	9.7e-07	0.0489077	1.74e-06	8.03593	0.0816		-22.8984	-5.55487	0.0564808
2-10	0.00831639	9.18e-07	0.048909	1.8e-06	8.21324	0.0815		-22.8721	-5.52803	0.0572608
nbs123	0.0084145	7.38e-07	0.0500548	1.46e-06	8.77738	0.0837					-5.47845	0.158149
2-11	0.00831522	8.18e-07	0.0489118	1.62e-06	8.23576	0.079		-22.7982	-5.45285	0.0583441
2-11	0.0083177	8.52e-07	0.0489158	1.86e-06	8.25124	0.0824		-22.7175	-5.3707	0.061261
2-11	0.00831402	8.5e-07	0.0489013	1.73e-06	8.13037	0.0816		-23.0082	-5.66655	0.059654
nbs123	0.00841282	9.72e-07	0.050051	1.91e-06	8.50833	0.101
2-11	0.00831644	8.43e-07	0.0489132	1.73e-06	8.17947	0.0757		-22.7056	-5.35858	0.0614897
2-11	0.00831498	8.43e-07	0.0489079	1.95e-06	8.0498	0.084		-22.8124	-5.46737	0.064185
2-11	0.00831533	8.25e-07	0.0489138	1.76e-06	8.11772	0.0773		-22.695	-5.3478	0.0618443
nbs123	0.00841297	8.08e-07	0.0500483	1.64e-06	8.61558	0.0765
2-11	0.00831776	9.63e-07	0.0489085	1.57e-06	8.18881	0.0746		-22.9187	-5.57548	0.057794
2-11	0.00831854	8.92e-07	0.0489085	1.62e-06	8.16022	0.0802		-22.9185	-5.57528	0.058368
2-11	0.00831652	9.82e-07	0.0489134	1.57e-06	8.22691	0.0872		-22.8212	-5.47626	0.0577922
nbs123	0.00841722	8.84e-07	0.050063	1.76e-06	8.70768	0.0736					-5.47677	0.221337
2-12	0.00831791	8.32e-07	0.0489123	1.71e-06	8.18445	0.0771		-22.8498	-5.50538	0.0577287
2-12	0.00831702	9.4e-07	0.0489113	1.61e-06	8.12211	0.0749		-22.8682	-5.52408	0.0565144
2-12	0.00831637	1.04e-06	0.0489169	1.73e-06	8.15203	0.0789		-22.7567	-5.41063	0.0579752
nbs123	0.00841689	8.8e-07	0.050049	1.48e-06	8.7124	0.0775
2-12	0.0083189	9.48e-07	0.0489191	2.06e-06	8.08767	0.0762		-22.6605	-5.31274	0.0653921
2-12	0.00831646	9.21e-07	0.0489202	1.73e-06	8.07914	0.0799		-22.6379	-5.28977	0.0612653
2-12	0.00831604	1e-06	0.0489167	1.75e-06	8.08824	0.0725		-22.7095	-5.36256	0.0615037
nbs123	0.00841376	1.06e-06	0.0500577	2.02e-06	8.87393	0.0996
2-12	0.00831644	8.93e-07	0.0489173	1.79e-06	8.17179	0.0748		-22.7042	-5.35721	0.0619824
2-12	0.00831811	9.09e-07	0.0489164	1.41e-06	8.15296	0.0727		-22.7214	-5.3747	0.057738
2-12	0.00831973	9.55e-07	0.0489183	1.69e-06	8.07366	0.0775		-22.6846	-5.33728	0.0607976
nbs123	0.00841385	9.51e-07	0.0500497	1.48e-06	8.6062	0.0767					-5.38604	0.161913
2-13	0.00831662	8.63e-07	0.0489118	1.52e-06	8.10135	0.0769		-22.7978	-5.45242	0.0538566
2-13	0.0083157	9.08e-07	0.0489177	1.77e-06	8.16815	0.0784		-22.6817	-5.33428	0.0569563
2-13	0.00831737	8.15e-07	0.0489167	1.55e-06	8.29187	0.0757		-22.7003	-5.35319	0.054211
nbs123	0.00841726	8.8e-07	0.0500562	1.63e-06	8.53528	0.0736
2-13	0.0083183	9.98e-07	0.0489152	1.58e-06	8.15846	0.079		-22.7466	-5.4004	0.0545718
2-13	0.00831402	8.65e-07	0.0489164	1.43e-06	8.0826	0.0748		-22.7217	-5.37499	0.0528142
2-13	0.00831539	8.23e-07	0.0489174	1.71e-06	8.26402	0.0803		-22.7019	-5.35486	0.0561847
nbs123	0.00841495	8.11e-07	0.0500513	1.48e-06	8.6239	0.0774
2-13	0.00831728	8.51e-07	0.048916	1.62e-06	8.06917	0.0819		-22.6475	-5.29946	0.0549447
2-13	0.00831434	9.42e-07	0.0489124	2.08e-06	8.13944	0.0786		-22.721	-5.37429	0.0610778
2-13	0.00831406	9.13e-07	0.048913	1.82e-06	8.17551	0.0753		-22.7082	-5.36128	0.0575033
nbs123	0.00841346	8.59e-07	0.0500477	1.62e-06	8.68061	0.0794					-5.36724	0.0852397
nbs123	0.00842742	9.22e-07	0.0500343	1.99e-06	8.87049	0.161
2-14	0.00833027	7.9e-07	0.0489025	1.8e-06	8.5763	0.0899		-22.7816	-5.43599	0.0630193
2-14	0.0083291	9.11e-07	0.0489013	1.43e-06	8.65123	0.0934		-22.806	-5.4608	0.0589214
2-14	0.00832944	9.81e-07	0.0489062	1.79e-06	8.74356	0.0903		-22.7075	-5.36053	0.0628984
nbs123	0.00842942	8.95e-07	0.0500508	1.61e-06	9.17102	0.0897
2-14	0.00833151	8.4e-07	0.0489067	1.68e-06	8.72263	0.0921		-22.8488	-5.50441	0.0550552
2-14	0.00832979	8.15e-07	0.0489059	1.55e-06	8.67007	0.0926		-22.863	-5.51885	0.0534374
2-14	0.00832808	9.57e-07	0.0489077	1.73e-06	8.79912	0.091		-22.8269	-5.48204	0.0556983
nbs123	0.00843053	8.23e-07	0.0500497	1.43e-06	9.14474	0.0954
2-14	0.00832847	8.87e-07	0.04891	1.64e-06	8.65626	0.0824		-22.8107	-5.46562	0.0555037
2-14	0.00832789	9.78e-07	0.0489097	1.61e-06	8.68254	0.0942		-22.8159	-5.47091	0.0551354
2-14	0.00832963	8.44e-07	0.0489089	1.6e-06	8.77554	0.0872		-22.8311	-5.48636	0.0550139
nbs123	0.00842723	8.11e-07	0.0500537	1.69e-06	9.23299	0.0891					-5.46506	0.0922144
2-15	0.00832869	8.55e-07	0.0489074	1.7e-06	8.76521	0.0952		-22.9524	-5.60985	0.0584938
2-15	0.0083273	8.07e-07	0.0489132	1.66e-06	8.72169	0.0946		-22.8366	-5.49192	0.0580091
2-15	0.00832922	9.04e-07	0.0489115	1.51e-06	8.59734	0.0898		-22.8703	-5.52628	0.0562706
nbs123	0.00842733	1.05e-06	0.050059	1.64e-06	9.25303	0.144
2-15	0.00832897	9.63e-07	0.0488985	1.67e-06	8.59366	0.0777		-23.178	-5.83937	0.0574453
2-15	0.00832728	8.85e-07	0.048913	1.65e-06	8.77641	0.0894		-22.8881	-5.54436	0.0571972
2-15	0.00833071	8e-07	0.0489086	1.62e-06	8.77742	0.0992		-22.9754	-5.63321	0.0568394
nbs123	0.00842857	8.6e-07	0.0500585	1.63e-06	9.27111	0.0911
2-15	0.00832821	8.4e-07	0.0489112	1.45e-06	8.78104	0.0849		-22.9177	-5.57451	0.0550054
2-15	0.00832813	6.88e-07	0.0489087	1.7e-06	8.74856	0.0924		-22.9671	-5.62472	0.0579215
2-15	0.00832816	8.99e-07	0.048911	1.77e-06	8.7486	0.0873		-22.9229	-5.57979	0.0587905
nbs123	0.00842837	6.97e-07	0.0500583	1.65e-06	11.9812	0.081					-5.60267	0.200391
2-16	0.00832921	8.42e-07	0.0489197	1.78e-06	9.20514	0.0968		-22.7252	-5.37856	0.0583673
2-16	0.00832635	9.19e-07	0.0489177	1.52e-06	9.15391	0.107		-22.7637	-5.4178	0.0552113
2-16	0.00832748	8.59e-07	0.0489163	1.85e-06	8.99221	0.0968		-22.7917	-5.44627	0.0592715
nbs123	0.0084246	8.62e-07	0.0500561	1.58e-06	9.39262	0.0981
2-16	0.00832839	8.12e-07	0.0489124	1.48e-06	8.82195	0.094		-22.9139	-5.57058	0.0566095
2-16	0.00832771	1.06e-06	0.0489162	1.51e-06	8.73456	0.0913		-22.8375	-5.49291	0.0569384
2-16	0.00832948	8.15e-07	0.0489161	1.78e-06	8.75988	0.0981		-22.8395	-5.49495	0.0601101
nbs123	0.00842569	7.59e-07	0.0500628	1.8e-06	9.26253	0.0995
2-16	0.00832705	8.73e-07	0.0489131	1.86e-06	8.8488	0.098		-22.8759	-5.53199	0.0595282
2-16	0.00832347	8.93e-07	0.0489147	1.72e-06	8.89051	0.0932		-22.8444	-5.49986	0.0577411
2-16	0.00832736	8.09e-07	0.0489152	1.64e-06	8.77031	0.0913		-22.8342	-5.4895	0.0567597
nbs123	0.00842465	7.97e-07	0.0500538	1.42e-06	9.28447	0.0924					-5.48027	0.116358
2-17	0.00832714	8.19e-07	0.0489141	1.5e-06	8.62011	0.0958		-22.805	-5.45982	0.0509501
2-17	0.00832653	8e-07	0.048915	1.58e-06	8.7466	0.0934		-22.7867	-5.44112	0.0519506
2-17	0.00832776	8.61e-07	0.0489087	1.54e-06	8.48914	0.0944		-22.9131	-5.56982	0.0514486
nbs123	0.00842457	8.18e-07	0.0500575	1.46e-06	9.25694	0.09
2-17	0.00832624	8.9e-07	0.0489154	1.63e-06	8.55724	0.0822		-22.8308	-5.48604	0.0552044
2-17	0.00832424	8.55e-07	0.0489142	1.63e-06	8.71999	0.0938		-22.8556	-5.51125	0.0552049
2-17	0.00832588	9.31e-07	0.0489179	1.59e-06	8.6542	0.0937		-22.7807	-5.43501	0.0547137
nbs123	0.0084259	8.19e-07	0.0500591	1.65e-06	9.21578	0.0818
2-17	0.0083256	8.5e-07	0.0489173	1.59e-06	8.66085	0.0877		-22.8264	-5.48156	0.0587382
2-17	0.00832545	9.84e-07	0.0489184	1.65e-06	8.64965	0.0886		-22.806	-5.46083	0.0594253
2-17	0.00832559	8.56e-07	0.0489177	1.64e-06	8.66944	0.0872		-22.8186	-5.47363	0.0593098
nbs123	0.00842486	7.6e-07	0.050061	1.81e-06	9.14984	0.0898					-5.4799	0.081959
2-18	0.00832703	9.49e-07	0.0489152	1.84e-06	8.68103	0.0893		-22.8333	-5.4886	0.060469
2-18	0.00832714	8.31e-07	0.0489203	1.68e-06	8.72963	0.0937		-22.7324	-5.38592	0.0584883
2-18	0.0083245	9.6e-07	0.0489166	1.67e-06	8.68209	0.0878		-22.8051	-5.45993	0.05837
nbs123	0.00842516	8.97e-07	0.0500555	1.53e-06	9.25192	0.0946
2-18	0.00832303	8.67e-07	0.0489163	1.61e-06	8.67255	0.087		-22.8307	-5.48592	0.0538831
2-18	0.00832468	8.69e-07	0.0489159	1.63e-06	8.61468	0.0862		-22.8391	-5.49446	0.054134
2-18	0.00832418	8.54e-07	0.0489169	1.42e-06	8.58913	0.0878		-22.8191	-5.47413	0.051602
nbs123	0.00842287	9.16e-07	0.0500629	1.49e-06	8.99398	0.0897
2-18	0.00832126	8.67e-07	0.0489184	1.69e-06	8.52672	0.0829		-22.8223	-5.47738	0.0543454
2-18	0.00832439	8.62e-07	0.0489168	1.74e-06	8.67718	0.0842		-22.8552	-5.51092	0.0550016
2-18	0.0083216	8.53e-07	0.0489206	1.69e-06	8.52794	0.0884		-22.7801	-5.43448	0.0543444
nbs123	0.00842303	7.39e-07	0.050059	1.48e-06	8.9938	0.0864					-5.46797	0.075294
2-19	0.00832605	9.57e-07	0.0489167	1.73e-06	8.52499	0.0846		-22.7898	-5.44432	0.0556429
2-19	0.00832274	8.68e-07	0.0489171	1.68e-06	8.56704	0.0789		-22.7818	-5.43619	0.0549987
2-19	0.00832274	9.21e-07	0.0489193	1.6e-06	8.55393	0.0873		-22.7381	-5.39166	0.0539917
nbs123	0.00841886	7.46e-07	0.050056	1.56e-06	9.0045	0.0943
2-19	0.00832276	8.33e-07	0.0489141	1.55e-06	8.41979	0.0852		-22.8731	-5.52905	0.0565452
2-19	0.00832121	8.42e-07	0.0489153	1.59e-06	8.35506	0.0802		-22.8495	-5.50506	0.0570071
2-19	0.00832267	9.64e-07	0.0489216	1.58e-06	8.45946	0.0943		-22.723	-5.37636	0.0568884
nbs123	0.008424	9.03e-07	0.0500623	1.75e-06	9.04046	0.0901
2-19	0.00832565	1e-06	0.048918	1.64e-06	8.53754	0.087		-22.8514	-5.50698	0.0559284
2-19	0.00832462	9.12e-07	0.0489206	1.58e-06	8.54092	0.0898		-22.8	-5.45474	0.0552009
2-19	0.00832424	7.76e-07	0.0489177	1.61e-06	8.4943	0.091		-22.858	-5.51369	0.055563
nbs123	0.00842346	7.73e-07	0.0500617	1.4e-06	9.03404	0.0902					-5.46201	0.110358
2-20	0.00832501	9.31e-07	0.0489166	1.6e-06	8.44092	0.0904		-22.8624	-5.51825	0.0527828
2-20	0.00832651	9.07e-07	0.0489182	1.55e-06	8.39834	0.0905		-22.8315	-5.48674	0.0521549
2-20	0.00832675	8e-07	0.0489159	1.75e-06	8.50225	0.0942		-22.8762	-5.53228	0.0547363
nbs123	0.00842214	7.4e-07	0.0500606	1.53e-06	8.89644	0.0865
2-20	0.00832386	9.63e-07	0.0489191	1.58e-06	8.50689	0.0844		-22.8248	-5.47995	0.0538434
2-20	0.00832304	7.75e-07	0.0489186	1.46e-06	8.38189	0.0845		-22.8356	-5.49093	0.0524089
2-20	0.00832717	8.33e-07	0.0489171	1.59e-06	8.4025	0.0896		-22.8646	-5.5204	0.053967
nbs123	0.0084235	8.61e-07	0.0500629	1.52e-06	8.93554	0.0918
2-20	0.00832447	9.76e-07	0.0489205	1.5e-06	8.31896	0.0814		-22.8463	-5.50183	0.0538156
2-20	0.00832661	8.22e-07	0.0489279	1.46e-06	8.40456	0.0815		-22.6999	-5.35282	0.0533514
2-20	0.00832249	8.02e-07	0.0489222	1.66e-06	8.30885	0.0894		-22.8128	-5.46768	0.0557432
nbs123	0.00842432	7.28e-07	0.0500657	1.61e-06	8.76903	0.0959					-5.48343	0.10651
													-5.44852	0.199565
