# Supplementary material for: A newly synthesized reference material for in situ sulfur isotope measurement of sphalerite using laser ablation MC-ICP-MS
Source: Royal Society of Chemistry journal article supplement (doi:10.1039/d2ja00394e), 2023-01-01
Supplement: d2ja00394e3.xlsx [file d2ja00394e3.xlsx]

## Sheet: Sheet1
SampleName	'33/32 Raw'	SE	'34/32 Raw'	SE	'Total Beam (V)'	SE		δ34S	δ34SVCDT	1se
2022.05	第一次
nbs123	0.0084189	8.71e-07	0.0500635	1.61e-06	9.14087	0.0895
1-1	0.00832047	9.3e-07	0.0489257	1.64e-06	8.54851	0.0837		-22.7483	-5.40212	0.0562709
1-1	0.00832026	7.92e-07	0.0489275	1.5e-06	8.56146	0.0879		-22.7112	-5.36431	0.054614
1-1	0.00831737	9.72e-07	0.048922	1.6e-06	8.39427	0.0821		-22.8218	-5.47693	0.0557892
nbs123	0.0084189	8.54e-07	0.0500655	1.59e-06	8.96713	0.0934
1-1	0.00831825	9.28e-07	0.0489248	1.67e-06	8.40502	0.0838		-22.814	-5.46894	0.057559
1-1	0.00832092	8.39e-07	0.0489252	1.39e-06	8.3439	0.0835		-22.8076	-5.46244	0.0543606
1-1	0.00831759	1.03e-06	0.0489216	1.72e-06	8.34694	0.0874		-22.8787	-5.5348	0.0581722
nbs123	0.00842014	7.82e-07	0.0500686	1.69e-06	8.88732	0.0923
1-1	0.0083184	9.4e-07	0.0489163	1.69e-06	8.18228	0.0848		-22.9815	-5.63945	0.0588128
1-1	0.00831858	9.36e-07	0.0489256	1.62e-06	8.41218	0.0959		-22.7972	-5.45183	0.0579802
1-1	0.00832014	8.68e-07	0.0489296	1.66e-06	8.31159	0.0852		-22.7175	-5.37072	0.0584493
nbs123	0.00842132	9.1e-07	0.0500653	1.68e-06	8.80694	0.0837
1-2	0.00832213	9.07e-07	0.0489272	1.5e-06	8.43278	0.0821		-22.7016	-5.35454	0.0544398
1-2	0.00832268	8.49e-07	0.0489243	1.76e-06	8.33587	0.082		-22.7583	-5.41228	0.0576013
1-2	0.00832107	8.35e-07	0.0489289	1.42e-06	8.48663	0.0873		-22.6658	-5.31815	0.0535355
nbs123	0.00842044	7.71e-07	0.0500621	1.5e-06	8.79097	0.0855
1-2	0.00831975	7.62e-07	0.0489306	1.55e-06	8.40477	0.0861		-22.6642	-5.3165	0.053245
1-2	0.00832128	8.98e-07	0.0489264	1.48e-06	8.33713	0.0801		-22.7481	-5.40188	0.052408
1-2	0.00832302	7.64e-07	0.0489281	1.52e-06	8.37479	0.087		-22.7149	-5.36813	0.0528835
nbs123	0.00842121	9.01e-07	0.0500685	1.53e-06	8.82373	0.0925
1-2	0.0083215	8.76e-07	0.0489242	1.53e-06	8.2924	0.0887		-22.8618	-5.5176	0.0534585
1-2	0.00831997	8.33e-07	0.0489231	1.38e-06	8.36069	0.0801		-22.8846	-5.54078	0.0517251
1-2	0.00832262	8.93e-07	0.0489261	1.54e-06	8.40657	0.0889		-22.8245	-5.47959	0.0535776
nbs123	0.00841877	8.34e-07	0.0500693	1.54e-06	8.77421	0.0867
1-3	0.00831961	8.96e-07	0.0489209	1.78e-06	8.22698	0.0894		-22.9038	-5.56035	0.057705
1-3	0.0083213	9.16e-07	0.0489268	1.86e-06	8.27981	0.0887		-22.7858	-5.44022	0.0587468
1-3	0.00832134	9.56e-07	0.0489247	1.67e-06	8.41947	0.0844		-22.8275	-5.4827	0.0563126
nbs123	0.00842194	8.03e-07	0.050066	1.63e-06	8.74962	0.0826
1-3	0.00831974	9.06e-07	0.048922	1.79e-06	8.41528	0.0796		-22.9286	-5.58558	0.0606346
1-3	0.00832162	9.31e-07	0.048924	1.75e-06	8.3044	0.0844		-22.8885	-5.54472	0.0601439
1-3	0.00832022	9.34e-07	0.0489214	1.52e-06	8.21459	0.0826		-22.9404	-5.59757	0.0574733
nbs123	0.00842043	8.69e-07	0.050074	1.79e-06	8.69989	0.0833
1-3	0.00831834	9.62e-07	0.048925	1.53e-06	8.13706	0.0754		-22.8906	-5.54693	0.0587342
1-3	0.00831973	9.11e-07	0.0489277	1.81e-06	8.282	0.0808		-22.8365	-5.49184	0.0619698
1-3	0.00831895	8.52e-07	0.0489269	1.92e-06	8.29466	0.0853		-22.8529	-5.50851	0.063338
nbs123	0.00841861	7.72e-07	0.0500684	1.73e-06	8.66115	0.0858
2-1	0.00831932	8.33e-07	0.0489185	1.58e-06	8.05844	0.0883		-22.9485	-5.60588	0.0577616
2-1	0.00832199	9.47e-07	0.0489234	1.63e-06	8.30249	0.0831		-22.8501	-5.50567	0.0583374
2-1	0.00832313	1.01e-06	0.0489226	1.82e-06	8.29181	0.0809		-22.8671	-5.52294	0.0606397
nbs123	0.00842095	8.52e-07	0.0500665	1.66e-06	8.60008	0.105
2-1	0.00832024	9.4e-07	0.0489241	1.54e-06	7.98872	0.083		-22.8392	-5.49462	0.0573063
2-1	0.00832071	9.47e-07	0.0489222	1.5e-06	8.01219	0.0869		-22.8772	-5.53324	0.056862
2-1	0.0083223	9.7e-07	0.0489199	1.61e-06	8.0086	0.0814		-22.9219	-5.57878	0.0581061
nbs123	0.00841613	7.95e-07	0.0500687	1.73e-06	8.58944	0.0866
2-1	0.00832205	8.21e-07	0.0489275	1.68e-06	8.26145	0.0802		-22.8009	-5.4556	0.0577166
2-1	0.00831877	8.24e-07	0.0489277	1.74e-06	8.20155	0.0849		-22.7965	-5.45113	0.0584544
2-1	0.00831854	7.54e-07	0.0489264	1.68e-06	8.09095	0.0831		-22.8219	-5.47695	0.0577171
nbs123	0.00841953	7.84e-07	0.0500695	1.55e-06	8.6098	0.0785
2-2	0.00832083	1.03e-06	0.0489278	1.89e-06	8.10895	0.0812		-22.8359	-5.4912	0.0659235
2-2	0.00832167	9.66e-07	0.0489251	1.52e-06	8.15729	0.0878		-22.891	-5.5473	0.0617978
2-2	0.0083209	9.28e-07	0.0489268	1.67e-06	8.29814	0.0875		-22.8566	-5.51234	0.063394
nbs123	0.00841966	8.08e-07	0.0500729	2.18e-06	8.41029	0.118
2-2	0.00832152	8.51e-07	0.0489282	1.8e-06	8.33679	0.0804		-22.8395	-5.49487	0.0670704
2-2	0.00832013	8.2e-07	0.0489256	1.78e-06	8.45468	0.0792		-22.8916	-5.54792	0.0668482
2-2	0.008321	1.02e-06	0.048928	1.72e-06	8.26041	0.0807		-22.8451	-5.50056	0.0661878
nbs123	0.00841823	8.64e-07	0.0500708	1.77e-06	8.84286	0.0885
2-2	0.00832017	9.96e-07	0.0489287	1.73e-06	8.22728	0.0797		-22.8049	-5.45971	0.0595533
2-2	0.00832033	9.66e-07	0.0489243	1.57e-06	8.35134	0.0803		-22.8916	-5.54793	0.0576734
2-2	0.00832295	8.39e-07	0.048931	1.44e-06	8.26464	0.0788		-22.7598	-5.41377	0.0562362
nbs123	0.00841938	8.5e-07	0.0500703	1.62e-06	8.78825	0.0905
2-3	0.00832071	8.8e-07	0.0489287	1.45e-06	8.32494	0.08		-22.7441	-5.39783	0.0541634
2-3	0.00832096	8.82e-07	0.0489282	1.49e-06	8.4542	0.086		-22.7531	-5.40698	0.0546152
2-3	0.00832032	9.32e-07	0.0489277	1.58e-06	8.51671	0.0839		-22.7647	-5.41877	0.055662
nbs123	0.00842053	8.79e-07	0.0500646	1.59e-06	8.82664	0.0921
2-3	0.00831949	9.05e-07	0.0489226	1.65e-06	8.1538	0.0777		-22.8936	-5.54991	0.057553
2-3	0.0083175	8.86e-07	0.0489287	1.69e-06	8.21421	0.0805		-22.7731	-5.42734	0.0580334
2-3	0.00832142	1.18e-06	0.048926	1.9e-06	8.15885	0.0738		-22.8272	-5.48243	0.0606873
nbs123	0.00841892	9.62e-07	0.0500732	1.71e-06	8.72473	0.0883
2-3	0.00832106	9.9e-07	0.0489282	1.7e-06	8.24211	0.0806		-22.7987	-5.45336	0.0574032
2-3	0.00832186	9.25e-07	0.0489261	1.75e-06	8.24181	0.0864		-22.8408	-5.49625	0.0580284
2-3	0.00832011	9.79e-07	0.0489302	1.87e-06	8.21378	0.0856		-22.7597	-5.41372	0.0595695
nbs123	0.00841982	8.87e-07	0.0500663	1.52e-06	8.73238	0.083
2-3	0.00831868	9.07e-07	0.0489208	1.57e-06	8.14389	0.0844		-22.9252	-5.58207	0.0567048
2-3	0.00832036	9.94e-07	0.0489277	1.84e-06	8.15873	0.083		-22.7857	-5.44019	0.0599978
2-3	0.00832227	9.66e-07	0.0489272	1.75e-06	8.15688	0.0839		-22.7965	-5.45117	0.0588625
nbs123	0.00842084	9.6e-07	0.0500709	1.78e-06	8.67038	0.0937
2022.05	第二次
nbs123	0.00868814	1.04e-06	0.0499478	2.58e-06	8.61379	0.0717
3-1	0.00857992	1.02e-06	0.0488068	2.68e-06	12.1579	0.0495		-22.8225	-5.4776	0.0941868
3-1	0.00858097	8.49e-07	0.0488123	2.52e-06	12.2125	0.051		-22.7132	-5.36634	0.0923108
3-1	0.00857516	7.72e-07	0.0488062	2.24e-06	12.2753	0.048		-22.8359	-5.49125	0.0892325
nbs123	0.00868188	1.07e-06	0.0499457	2.82e-06	8.66654	0.0626
3-1	0.00858406	9.46e-07	0.0488086	2.77e-06	12.4448	0.0502		-22.6925	-5.34527	0.0947387
3-1	0.00857432	9.59e-07	0.0488048	2.51e-06	12.3143	0.0408		-22.7672	-5.42128	0.0916492
3-1	0.0085672	7.87e-07	0.0488008	2.61e-06	12.383	0.0428		-22.8477	-5.50321	0.092817
nbs123	0.00866144	1.05e-06	0.049938	2.53e-06	8.79441	0.0671
3-1	0.00856784	7.94e-07	0.048805	2.67e-06	12.4841	0.0493		-22.7221	-5.3754	0.0942612
3-1	0.0085694	8.76e-07	0.0488046	2.57e-06	12.6176	0.0411		-22.7311	-5.38457	0.0930873
3-1	0.00857142	8.12e-07	0.0488026	2.61e-06	12.2559	0.0538		-22.7703	-5.42452	0.0935546
nbs123	0.00867786	9.91e-07	0.0499414	2.88e-06	8.76253	0.0708
3-2	0.00856747	9.35e-07	0.0488012	2.75e-06	11.7377	0.0491		-22.771	-5.42517	0.0934592
3-2	0.00856963	8.11e-07	0.0488094	2.64e-06	12.7897	0.0471		-22.6074	-5.25866	0.0921123
3-2	0.00856855	8.09e-07	0.048809	2.58e-06	12.3048	0.0578		-22.6154	-5.26681	0.0913962
nbs123	0.00866938	1.01e-06	0.0499352	2.36e-06	8.72006	0.0654
3-2	0.0085686	8.53e-07	0.0488077	2.43e-06	12.2233	0.0481		-22.633	-5.28474	0.0875044
3-2	0.00857516	8.37e-07	0.0488122	2.54e-06	12.2436	0.0568		-22.5417	-5.19181	0.0888032
3-2	0.00856786	6.83e-07	0.0488109	2.37e-06	12.1793	0.0469		-22.5691	-5.21973	0.0868091
nbs123	0.00866991	9.32e-07	0.0499406	2.71e-06	8.67819	0.0711
3-2	0.00856714	8.18e-07	0.0488131	2.51e-06	12.6928	0.0585		-22.7422	-5.39592	0.0904087
3-2	0.00857671	9.37e-07	0.0488128	2.34e-06	12.9801	0.0602		-22.7491	-5.40285	0.0884744
3-2	0.00858065	8.18e-07	0.0488162	2.67e-06	12.7541	0.057		-22.681	-5.33357	0.0923103
nbs123	0.00867507	8.78e-07	0.0499576	2.54e-06	8.50508	0.0722
3-3	0.00858129	9.52e-07	0.048821	2.33e-06	12.8311	0.06		-22.7285	-5.38192	0.0852527
3-3	0.0085686	8.37e-07	0.0488275	2.84e-06	12.4339	0.0501		-22.5984	-5.24949	0.091506
3-3	0.00856621	7.39e-07	0.0488251	2.28e-06	12.692	0.0579		-22.6478	-5.29981	0.0846815
nbs123	0.00866965	1.01e-06	0.0499553	2.45e-06	8.57168	0.0715
3-3	0.00856012	7.6e-07	0.0488238	2.41e-06	11.9148	0.0597		-22.6475	-5.29951	0.0882313
3-3	0.00856645	7.62e-07	0.0488249	2.8e-06	12.5764	0.0497		-22.6261	-5.27771	0.0929355
3-3	0.00856258	8.32e-07	0.0488284	2.44e-06	12.6532	0.0582		-22.5554	-5.20579	0.0885739
nbs123	0.00866386	9.05e-07	0.049955	2.71e-06	8.62158	0.0658
3-3	0.00856533	7.96e-07	0.0488303	2.35e-06	12.6028	0.0504		-22.506	-5.15553	0.0876591
3-3	0.00855616	8.46e-07	0.0488235	2.61e-06	12.5891	0.0503		-22.6426	-5.29448	0.090696
3-3	0.00857263	8.5e-07	0.0488228	2.49e-06	12.3437	0.0462		-22.6554	-5.30752	0.0892698
nbs123	0.00868797	8.96e-07	0.0499542	2.46e-06	8.56883	0.0646
4-1	0.00858676	1.2e-06	0.0488147	2.69e-06	8.05491	0.0746		-22.969	-5.62671	0.0878135
4-1	0.00858405	1.19e-06	0.0488159	2.57e-06	8.02582	0.0687		-22.946	-5.60328	0.0862913
4-1	0.00858516	9.88e-07	0.0488169	2.37e-06	7.93191	0.0645		-22.9266	-5.58352	0.0838539
nbs123	0.00868356	9.45e-07	0.0499705	2.37e-06	8.64357	0.0635
4-1	0.008573	1e-06	0.0488142	2.68e-06	7.94344	0.0689		-23.0318	-5.69066	0.0899916
4-1	0.00857195	1.17e-06	0.0488163	2.49e-06	8.02069	0.0709		-22.9886	-5.64667	0.08767
4-1	0.00856683	9.45e-07	0.048818	2.58e-06	7.96733	0.0676		-22.9546	-5.61204	0.0887542
nbs123	0.00866322	9.9e-07	0.0499594	2.66e-06	8.63377	0.0776
4-1	0.0085672	1.06e-06	0.0488208	2.7e-06	7.43362	0.0338		-22.7596	-5.41358	0.0919688
4-1	0.00856686	1.04e-06	0.0488207	2.5e-06	7.35539	0.034		-22.7626	-5.41664	0.0895652
4-1	0.00856099	9.69e-07	0.0488184	2.71e-06	7.92556	0.0645		-22.8068	-5.46166	0.0920937
nbs123	0.00866087	1.04e-06	0.0499562	2.53e-06	8.16049	0.105
4-2	0.00856211	9.81e-07	0.0488199	2.78e-06	8.08765	0.0727		-22.6981	-5.35099	0.092969
4-2	0.00855953	1.04e-06	0.0488173	2.52e-06	8.0048	0.0656		-22.7504	-5.40417	0.0898073
4-2	0.0085574	9.49e-07	0.0488175	2.68e-06	7.75827	0.066		-22.7453	-5.39908	0.0917303
nbs123	0.00866201	9.42e-07	0.0499513	2.66e-06	8.52549	0.0687
nbs123	0.0086719	9.57e-07	0.0499677	2.27e-06	8.31904	0.0689
4-2	0.0085725	9.57e-07	0.0488213	2.71e-06	7.90416	0.0592		-22.9353	-5.59239	0.0882637
4-2	0.0085824	1.09e-06	0.0488252	2.55e-06	7.87756	0.0617		-22.8578	-5.51357	0.0862378
4-2	0.00857391	9.6e-07	0.0488208	2.69e-06	8.0562	0.0597		-22.9451	-5.60237	0.088007
nbs123	0.0086691	8.95e-07	0.049967	2.57e-06	8.3727	0.0632
4-2	0.0085718	1.15e-06	0.0488239	2.42e-06	7.94031	0.0655		-22.7239	-5.37722	0.0885008
4-2	0.00857375	1.06e-06	0.0488225	2.86e-06	7.77385	0.0599		-22.7507	-5.40452	0.0938465
4-2	0.00856655	9.54e-07	0.0488273	2.62e-06	7.88345	0.0586		-22.6546	-5.30674	0.0908562
nbs123	0.00866409	9.44e-07	0.0499513	2.61e-06	8.37977	0.0665
4-3	0.00856193	1.02e-06	0.0488219	2.82e-06	8.01045	0.0627		-22.6929	-5.34567	0.0973783
4-3	0.00856742	1.08e-06	0.0488232	2.71e-06	7.93942	0.0601		-22.6662	-5.31857	0.0960581
4-3	0.00856944	9.98e-07	0.0488286	2.69e-06	7.98493	0.0641		-22.5598	-5.21019	0.0958185
nbs123	0.00867063	1.01e-06	0.0499598	2.92e-06	8.42072	0.0749
4-3	0.00856059	1.02e-06	0.048826	2.75e-06	7.91053	0.0601		-22.6944	-5.34718	0.0988654
4-3	0.00856868	1.17e-06	0.0488247	2.52e-06	7.96601	0.0615		-22.7192	-5.37244	0.0962604
4-3	0.00856907	9.19e-07	0.048827	2.59e-06	8.00315	0.0659		-22.6727	-5.32518	0.0970353
nbs123	0.00867002	1.1e-06	0.0499597	2.82e-06	8.23945	0.0638
4-3	0.00856304	9.47e-07	0.048822	2.62e-06	7.8871	0.0626		-22.7456	-5.3993	0.0937843
4-3	0.00856573	9.21e-07	0.0488213	2.54e-06	7.88846	0.0649		-22.7598	-5.41377	0.0928569
4-3	0.00856521	1.01e-06	0.0488207	2.68e-06	7.98556	0.0685		-22.7714	-5.42558	0.0944938
nbs123	0.00866375	9.83e-07	0.0499568	2.61e-06	8.26529	0.0647
3-1	0.00857175	1.02e-06	0.0488179	2.4e-06	7.97187	0.0696		-22.8526	-5.50828	0.0863362
3-1	0.00856765	8.63e-07	0.0488246	2.21e-06	7.95005	0.0605		-22.7181	-5.37139	0.0841775
3-1	0.0085565	9.16e-07	0.0488137	2.52e-06	7.86181	0.062		-22.9375	-5.59466	0.0877618
nbs123	0.00865563	9.12e-07	0.0499624	2.4e-06	8.33427	0.0663
3-1	0.0085529	9.95e-07	0.0488208	2.96e-06	7.94579	0.0644		-22.8291	-5.48435	0.0925645
3-1	0.00855002	9.81e-07	0.0488204	2.58e-06	8.01194	0.0651		-22.8371	-5.4925	0.087664
3-1	0.00855139	9.13e-07	0.048822	2.81e-06	8.05686	0.0676		-22.8057	-5.46051	0.0905809
nbs123	0.00865133	1.04e-06	0.0499603	2.54e-06	8.52312	0.0588
3-1	0.00854921	1.05e-06	0.0488199	2.52e-06	7.98942	0.0664		-22.7394	-5.39298	0.0889771
3-1	0.00854898	1.04e-06	0.0488256	2.78e-06	8.04347	0.0656		-22.6257	-5.27726	0.0921647
3-1	0.00856167	1.2e-06	0.0488189	2.47e-06	7.91058	0.0677		-22.7598	-5.41376	0.0883875
nbs123	0.00867043	9.31e-07	0.0499515	2.58e-06	8.29248	0.0616
3-2	0.00856963	9.77e-07	0.0488235	2.48e-06	8.07012	0.0667		-22.7272	-5.38058	0.0872527
3-2	0.00857516	1.1e-06	0.0488274	2.59e-06	8.08189	0.0673		-22.6485	-5.30052	0.0885807
3-2	0.00856695	1.05e-06	0.0488288	2.64e-06	8.07008	0.0656		-22.6213	-5.27281	0.0891967
nbs123	0.00866445	9.95e-07	0.0499664	2.43e-06	8.37488	0.0654
3-2	0.00855874	9.68e-07	0.0488259	2.66e-06	8.08405	0.065		-22.8878	-5.54408	0.0906047
3-2	0.00856812	9.57e-07	0.0488224	2.63e-06	7.99987	0.0668		-22.9585	-5.61597	0.090239
3-2	0.0085726	1.06e-06	0.0488229	2.41e-06	8.06842	0.0645		-22.9469	-5.60416	0.0876233
nbs123	0.00866656	9.95e-07	0.0499728	2.68e-06	8.43928	0.0679
											-5.43824	0.219393
2022.06	第一次
nbs123	0.0126243	4.91e-06	0.049749	1.89e-06	10.7544	0.0669
1-4	0.0126034	8.8e-06	0.0486053	1.91e-06	10.0025	0.0672		-22.8846	-5.54082	0.0688207
1-4	0.0124674	4.89e-06	0.048603	1.61e-06	9.98173	0.065		-22.9307	-5.58767	0.0654936
1-4	0.0125204	4.03e-06	0.0486041	1.62e-06	10.1951	0.0631		-22.9087	-5.56537	0.0655975
nbs123	0.0125576	2.87e-06	0.0497383	2.08e-06	10.6432	0.0558
1-4	0.0123784	3.37e-06	0.0486099	1.59e-06	10.1332	0.0566		-22.8878	-5.54408	0.0651631
1-4	0.0122823	4.52e-06	0.0486113	1.8e-06	10.2996	0.0649		-22.8599	-5.51564	0.0674346
1-4	0.0122605	2.67e-06	0.0486157	1.84e-06	10.4613	0.0624		-22.7714	-5.42563	0.067888
nbs123	0.0123252	3.31e-06	0.0497587	1.88e-06	10.7603	0.0681
1-4	0.0122145	4.95e-06	0.0486333	1.7e-06	10.5059	0.0614		-22.5512	-5.20152	0.0650632
1-4	0.0121912	3.54e-06	0.0486205	1.6e-06	10.4788	0.0656		-22.8085	-5.46335	0.0639865
1-4	0.0122828	2.78e-06	0.0486215	1.57e-06	10.4824	0.0602		-22.7888	-5.4433	0.063671
nbs123	0.0123319	3.88e-06	0.049752	1.98e-06	10.8684	0.0651
1-4	0.0123525	4.94e-06	0.0486229	1.78e-06	10.2712	0.0609		-22.574	-5.22465	0.0702427
1-4	0.0123815	6.27e-06	0.0486112	1.64e-06	10.3714	0.0655		-22.8086	-5.46341	0.06879
1-4	0.0123854	3.86e-06	0.0486209	1.62e-06	10.1898	0.0669		-22.614	-5.26536	0.0685859
nbs123	0.0123413	4.21e-06	0.0497396	2.23e-06	10.7007	0.065
1-5	0.0122938	4.75e-06	0.0486192	1.66e-06	10.429	0.058		-22.6658	-5.31811	0.0651849
1-5	0.0123071	5.37e-06	0.0486186	1.86e-06	10.2609	0.065		-22.6795	-5.33202	0.067431
1-5	0.0122823	2.74e-06	0.0486161	2.02e-06	10.2667	0.0655		-22.7287	-5.38214	0.0693523
nbs123	0.0123446	2.35e-06	0.0497539	1.63e-06	10.826	0.068
1-5	0.012142	4.78e-06	0.0486175	1.82e-06	10.2924	0.0636		-22.8865	-5.54269	0.062834
1-5	0.0121967	4.71e-06	0.0486248	1.63e-06	10.2619	0.0639		-22.7411	-5.3948	0.0605843
1-5	0.0122097	3.25e-06	0.0486247	1.73e-06	10.368	0.0599		-22.7428	-5.39644	0.061746
nbs123	0.012329	2.71e-06	0.0497586	1.91e-06	10.6253	0.0565
1-5	0.0122612	3.58e-06	0.0486253	1.82e-06	10.1393	0.059		-22.7633	-5.41734	0.0652438
1-5	0.0122548	3.59e-06	0.0486215	1.81e-06	10.3157	0.0593		-22.8391	-5.49445	0.0651277
1-5	0.0122559	4.96e-06	0.0486269	1.68e-06	10.1465	0.0682		-22.7307	-5.38421	0.0636352
nbs123	0.0122771	4.89e-06	0.0497573	1.85e-06	10.6048	0.0562
nbs123	0.0117565	3.8e-06	0.0497739	1.78e-06	10.7653	0.076
1-6	0.0118638	4.47e-06	0.0486438	1.66e-06	10.4135	0.0586		-22.7529	-5.40675	0.0626989
1-6	0.0119093	5.11e-06	0.0486413	2.03e-06	10.3333	0.0655		-22.8017	-5.45644	0.0671441
1-6	0.0119375	4.24e-06	0.0486494	1.82e-06	10.3128	0.0559		-22.6396	-5.29144	0.0645457
nbs123	0.0119543	3.68e-06	0.0497788	1.92e-06	10.6947	0.0626
1-6	0.0118355	3.77e-06	0.0486473	1.84e-06	10.3384	0.062		-22.7163	-5.36952	0.0662617
1-6	0.0119108	5.07e-06	0.0486479	1.64e-06	10.5102	0.0591		-22.7047	-5.35766	0.0640038
1-6	0.0118419	5.98e-06	0.0486527	1.79e-06	10.4051	0.06		-22.609	-5.26034	0.0656781
nbs123	0.0118264	4.21e-06	0.0497775	1.91e-06	10.8807	0.0624
1-6	0.0117052	4.35e-06	0.0486472	1.68e-06	10.4701	0.0623		-22.7731	-5.42735	0.0649225
1-6	0.0116015	4.11e-06	0.0486531	1.93e-06	10.4686	0.0583		-22.653	-5.30509	0.0677931
1-6	0.0116317	4.61e-06	0.0486493	1.78e-06	10.3273	0.0591		-22.7299	-5.38339	0.066038
nbs123	0.0115872	6.33e-06	0.0497842	1.96e-06	10.7697	0.0734
1-7	0.0116489	4.54e-06	0.0486588	1.91e-06	10.4067	0.0622		-22.6463	-5.29826	0.0681213
1-7	0.0115489	5.63e-06	0.0486554	1.99e-06	10.5121	0.0624		-22.7156	-5.36879	0.0690834
1-7	0.0115635	6.11e-06	0.0486527	2.01e-06	10.3443	0.0581		-22.7692	-5.42337	0.0693289
nbs123	0.011794	4.82e-06	0.0497884	1.96e-06	10.8437	0.0551
1-7	0.011645	4.65e-06	0.0486602	1.71e-06	10.3426	0.0563		-22.7583	-5.4123	0.0664366
1-7	0.0114813	6.89e-06	0.0486704	1.89e-06	10.3619	0.063		-22.5539	-5.20423	0.0684606
1-7	0.011514	4.69e-06	0.0486639	1.83e-06	10.5701	0.0569		-22.6846	-5.33729	0.0677718
nbs123	0.0115304	5.06e-06	0.0497983	2.01e-06	10.6453	0.08
nbs123	0.0117565	3.8e-06	0.0497739	1.78e-06	10.7653	0.076
1-7	0.0118638	4.47e-06	0.0486438	1.66e-06	10.4135	0.0586		-22.7529	-5.40675	0.0626989
1-7	0.0119093	5.11e-06	0.0486413	2.03e-06	10.3333	0.0655		-22.8017	-5.45644	0.0671441
1-7	0.0119375	4.24e-06	0.0486494	1.82e-06	10.3128	0.0559		-22.6396	-5.29144	0.0645457
nbs123	0.0119543	3.68e-06	0.0497788	1.92e-06	10.6947	0.0626
2-4	0.0118355	3.77e-06	0.0486473	1.84e-06	10.3384	0.062		-22.7163	-5.36952	0.0662617
2-4	0.0119108	5.07e-06	0.0486479	1.64e-06	10.5102	0.0591		-22.7047	-5.35766	0.0640038
2-4	0.0118419	5.98e-06	0.0486527	1.79e-06	10.4051	0.06		-22.609	-5.26034	0.0656781
nbs123	0.0118264	4.21e-06	0.0497775	1.91e-06	10.8807	0.0624
2-4	0.0117052	4.35e-06	0.0486472	1.68e-06	10.4701	0.0623		-22.7731	-5.42735	0.0649225
2-4	0.0116015	4.11e-06	0.0486531	1.93e-06	10.4686	0.0583		-22.653	-5.30509	0.0677931
2-4	0.0116317	4.61e-06	0.0486493	1.78e-06	10.3273	0.0591		-22.7299	-5.38339	0.066038
nbs123	0.0115872	6.33e-06	0.0497842	1.96e-06	10.7697	0.0734
2-4	0.0116489	4.54e-06	0.0486588	1.91e-06	10.4067	0.0622		-22.6463	-5.29826	0.0681213
2-4	0.0115489	5.63e-06	0.0486554	1.99e-06	10.5121	0.0624		-22.7156	-5.36879	0.0690834
2-4	0.0115635	6.11e-06	0.0486527	2.01e-06	10.3443	0.0581		-22.7692	-5.42337	0.0693289
nbs123	0.011794	4.82e-06	0.0497884	1.96e-06	10.8437	0.0551
2-5	0.011645	4.65e-06	0.0486602	1.71e-06	10.3426	0.0563		-22.7583	-5.4123	0.0664366
2-5	0.0114813	6.89e-06	0.0486704	1.89e-06	10.3619	0.063		-22.5539	-5.20423	0.0684606
2-5	0.011514	4.69e-06	0.0486639	1.83e-06	10.5701	0.0569		-22.6846	-5.33729	0.0677718
nbs123	0.0115304	5.06e-06	0.0497983	2.01e-06	10.6453	0.08
nbs123	0.0148181	2.5e-06	0.0495947	2.48e-06	8.19702	0.0467
2-5	0.0146895	3.15e-06	0.0484759	2.38e-06	7.36811	0.031		-22.5613	-5.21178	0.0837017
2-5	0.0147029	2.39e-06	0.0484723	2.12e-06	7.31917	0.0299		-22.6335	-5.28525	0.0806744
2-5	0.0147059	3.69e-06	0.0484752	2.21e-06	7.22288	0.0365		-22.5758	-5.22656	0.0816944
nbs123	0.0147613	1.75e-06	0.049595	2.27e-06	7.99729	0.0414
2-5	0.014603	3.07e-06	0.0484851	2.12e-06	7.21075	0.0294		-22.5898	-5.24081	0.0779844
2-5	0.0146077	2.82e-06	0.0484849	2.3e-06	7.26851	0.0334		-22.5951	-5.24615	0.0801251
2-5	0.0145761	3.21e-06	0.0484873	2.36e-06	7.27766	0.0312		-22.5455	-5.19567	0.0808624
nbs123	0.0145747	2.04e-06	0.0496164	2.26e-06	8.11464	0.0442
2-6	0.0143989	3.46e-06	0.0485035	2.33e-06	7.42101	0.033		-22.9441	-5.60139	0.0841462
2-6	0.0142573	3e-06	0.048524	2.29e-06	7.48977	0.0332		-22.5318	-5.18172	0.0836669
2-6	0.0142293	2.65e-06	0.0485235	2.26e-06	7.52796	0.0312		-22.5423	-5.19238	0.08332
nbs123	0.0142717	2.68e-06	0.0496687	2.58e-06	8.59699	0.0511
2-6	0.014058	3.32e-06	0.0485397	2.2e-06	7.5996	0.033		-22.5587	-5.20911	0.084544
2-6	0.0141318	7.58e-06	0.0485329	2.07e-06	7.48393	0.0375		-22.6958	-5.34868	0.083142
2-6	0.0141771	2.85e-06	0.0485246	2.2e-06	7.2439	0.0305		-22.863	-5.51878	0.0845515
nbs123	0.0142563	3.1e-06	0.0496514	2.43e-06	8.28222	0.0441
2-6	0.0140703	3.47e-06	0.048531	2.22e-06	7.44055	0.0325		-22.6076	-5.25892	0.079656
2-6	0.0141406	3.37e-06	0.0485274	2.13e-06	7.78292	0.0349		-22.6813	-5.33393	0.0786075
2-6	0.0143189	4.55e-06	0.0485163	2.26e-06	7.5828	0.0547		-22.9045	-5.56104	0.0801404
nbs123	0.0141875	2.31e-06	0.0496558	2.14e-06	8.41385	0.045
2022.06	第二次
nbs123	0.00843204	6.94e-07	0.0500485	1.71e-06	9.4877	0.0939
2-7	0.00833698	7.55e-07	0.0489122	1.69e-06	8.93518	0.0895		-22.7789	-5.43327	0.0577274
2-7	0.00833693	8.72e-07	0.0489179	1.63e-06	9.03318	0.0927		-22.6659	-5.31818	0.0569994
2-7	0.00833669	8.47e-07	0.0489141	1.55e-06	8.91787	0.0931		-22.741	-5.39463	0.0560604
nbs123	0.0084327	8.99e-07	0.0500563	1.56e-06	9.37811	0.0973
2-7	0.00833498	7.76e-07	0.0489139	1.51e-06	8.91505	0.087		-22.9072	-5.5638	0.052455
2-7	0.00833498	8.16e-07	0.0489224	1.49e-06	8.99497	0.0905		-22.7382	-5.39181	0.0522124
2-7	0.0083314	1.02e-06	0.0489245	1.42e-06	8.78335	0.0835		-22.6965	-5.34932	0.0513902
nbs123	0.00843392	7.68e-07	0.0500651	1.44e-06	9.25031	0.0909
2-7	0.00833604	8.92e-07	0.0489174	1.67e-06	8.83818	0.0903		-22.907	-5.5636	0.053987
2-7	0.00833561	8.68e-07	0.0489144	1.7e-06	8.86623	0.0845		-22.9659	-5.62357	0.0543782
2-7	0.00833659	8.57e-07	0.0489177	1.4e-06	8.9984	0.0888		-22.9004	-5.55689	0.0506773
nbs123	0.00843399	8.53e-07	0.0500633	1.52e-06	9.33661	0.0928
3-4	0.00833291	7.19e-07	0.0489184	1.76e-06	8.85606	0.0946		-22.9133	-5.56996	0.0553768
3-4	0.00833127	8.23e-07	0.0489226	1.66e-06	9.00165	0.0938		-22.8284	-5.48357	0.0540692
3-4	0.00832784	8.14e-07	0.0489291	1.52e-06	8.93406	0.0853		-22.6995	-5.35245	0.0523184
nbs123	0.008429	9.07e-07	0.0500679	1.46e-06	9.42862	0.101
3-4	0.00833171	7.47e-07	0.0489181	1.4e-06	9.03088	0.0879		-22.8548	-5.51052	0.10057
3-4	0.0083348	7.8e-07	0.0489131	1.83e-06	9.02922	0.0987		-22.9543	-5.61176	0.103416
3-4	0.00833341	8.72e-07	0.0489159	1.55e-06	8.92478	0.0978		-22.8978	-5.55423	0.101485
nbs123	0.00842927	2.28e-06	0.0500567	4.6e-06	10.2015	0.15
3-4	0.00833445	8.3e-07	0.0489124	1.5e-06	9.48881	0.0945		-22.8658	-5.52172	0.101828
3-4	0.00833383	8.61e-07	0.0489056	1.54e-06	9.09253	0.0916		-23.0011	-5.65936	0.102079
3-4	0.00833475	8.33e-07	0.0489066	1.54e-06	8.96863	0.0897		-22.9805	-5.63842	0.102079
nbs123	0.00843182	7.62e-07	0.0500573	1.57e-06	9.36053	0.0936
3-5	0.0083341	9.89e-07	0.0489115	1.48e-06	9.35217	0.086		-22.9873	-5.64529	0.0529989
3-5	0.00833457	8.48e-07	0.0489122	1.5e-06	9.20309	0.0954		-22.9741	-5.63187	0.0532332
3-5	0.00833193	7.87e-07	0.0489149	1.64e-06	9.23561	0.0904		-22.9189	-5.57576	0.0549308
nbs123	0.00842939	8.05e-07	0.0500673	1.51e-06	9.26162	0.0853
3-5	0.00833101	7.86e-07	0.0489176	1.6e-06	9.20668	0.0874		-22.8503	-5.50586	0.0552526
3-5	0.00833015	7.54e-07	0.0489189	1.25e-06	9.33011	0.0947		-22.8247	-5.47984	0.0513416
3-5	0.00832904	8.45e-07	0.048917	1.63e-06	9.37696	0.0908		-22.8623	-5.51806	0.0556181
nbs123	0.00842705	8.04e-07	0.0500558	1.64e-06	9.49877	0.101
3-5	0.00832977	9.51e-07	0.0489136	1.48e-06	9.38679	0.0874		-22.8939	-5.55024	0.0532863
3-5	0.00832976	7.79e-07	0.048918	1.42e-06	9.19666	0.0965		-22.8058	-5.46059	0.052598
3-5	0.00832885	8.2e-07	0.0489186	1.52e-06	9.20415	0.0917		-22.7934	-5.44798	0.053753
nbs123	0.00842525	7.04e-07	0.0500635	1.46e-06	9.60181	0.0974
3-6	0.00832801	8.35e-07	0.048925	1.42e-06	9.2916	0.0988		-22.7257	-5.37907	0.0498612
3-6	0.00832869	7.89e-07	0.0489238	1.4e-06	9.28061	0.0908		-22.7491	-5.40285	0.0496248
3-6	0.00832793	7.77e-07	0.0489251	1.56e-06	9.27266	0.0914		-22.7249	-5.37826	0.0515794
nbs123	0.00842899	7.91e-07	0.0500619	1.41e-06	9.4599	0.0923
3-6	0.00832867	6.51e-07	0.0489262	1.27e-06	9.25679	0.0917		-22.7058	-5.35884	0.0517205
3-6	0.0083284	7.77e-07	0.0489266	1.49e-06	9.18314	0.0887		-22.6984	-5.35132	0.054117
3-6	0.008329	7.97e-07	0.0489249	1.51e-06	9.0943	0.09		-22.732	-5.38547	0.0543487
nbs123	0.0084286	8.13e-07	0.050064	1.74e-06	9.42646	0.0923
nbs123	0.00841135	8.75e-07	0.0500912	1.97e-06	9.18946	0.0933
3-6	0.00831513	9.04e-07	0.0489509	1.5e-06	8.60079	0.0843		-22.8993	-5.55574	0.0573488
3-6	0.0083142	9.38e-07	0.0489578	1.57e-06	8.56795	0.0896		-22.7614	-5.41537	0.058123
3-6	0.00831247	7.95e-07	0.0489505	1.64e-06	8.53776	0.0867		-22.9063	-5.56285	0.0589267
nbs123	0.00841192	8.43e-07	0.0501049	1.42e-06	8.88073	0.107
3-7	0.00831228	8.35e-07	0.0489571	1.66e-06	8.88471	0.0783		-22.7275	-5.38093	0.0532716
3-7	0.00831244	7.95e-07	0.0489503	1.55e-06	8.91245	0.0882		-22.8635	-5.51928	0.0518731
3-7	0.00831056	7.83e-07	0.0489495	1.5e-06	8.93511	0.0905		-22.88	-5.53615	0.0512563
nbs123	0.00841152	8.01e-07	0.0500864	1.49e-06	9.3948	0.0976
3-7	0.00830946	8.17e-07	0.0489525	1.86e-06	8.96722	0.0819		-22.6949	-5.34772	0.0578698
3-7	0.00831069	8.61e-07	0.0489558	1.33e-06	8.97877	0.0838		-22.6286	-5.28027	0.0514129
3-7	0.00831209	7.47e-07	0.0489513	1.46e-06	8.905	0.0951		-22.7186	-5.3719	0.0528657
nbs123	0.00840969	7.92e-07	0.0500921	1.6e-06	9.19555	0.0943
3-7	0.00831268	8.58e-07	0.0489588	1.79e-06	8.98967	0.0825		-22.6518	-5.30383	0.0599277
3-7	0.00831331	8.44e-07	0.048952	1.78e-06	8.93538	0.0946		-22.7865	-5.44097	0.0598063
3-7	0.00831096	8.5e-07	0.0489478	1.48e-06	9.09777	0.0944		-22.8703	-5.5263	0.0562923
nbs123	0.00841353	9.22e-07	0.0500948	1.76e-06	9.12668	0.0851
4-4	0.0083096	8.57e-07	0.0489535	1.49e-06	8.96962	0.0908		-22.8415	-5.49695	0.0585067
4-4	0.00831161	8.3e-07	0.0489528	1.58e-06	8.7923	0.0813		-22.8561	-5.51178	0.0594841
4-4	0.00831222	7.96e-07	0.0489547	1.52e-06	8.90683	0.086		-22.8174	-5.47237	0.0588274
nbs123	0.00840982	7.79e-07	0.0501008	1.78e-06	9.22216	0.0856
4-4	0.00831072	9.4e-07	0.0489542	1.57e-06	8.72599	0.0847		-22.8814	-5.53752	0.0565614
4-4	0.00830978	7.08e-07	0.0489576	1.54e-06	8.75028	0.0877		-22.8131	-5.46804	0.056215
4-4	0.00831157	8.79e-07	0.0489538	1.57e-06	8.79057	0.0934		-22.8896	-5.54584	0.0565615
nbs123	0.00841275	8.01e-07	0.0501004	1.51e-06	9.14097	0.0889
4-4	0.00831298	8.28e-07	0.0489576	1.54e-06	8.70413	0.0821		-22.8111	-5.46596	0.0527478
4-4	0.00831191	8.01e-07	0.0489514	1.44e-06	8.71568	0.083		-22.9352	-5.59231	0.051558
4-4	0.00831309	8.04e-07	0.0489612	1.54e-06	8.74394	0.0896		-22.7402	-5.39384	0.0527465
nbs123	0.00841173	9.5e-07	0.0501006	1.49e-06	8.84291	0.101
4-5	0.00831193	8.65e-07	0.0489586	1.5e-06	8.8001	0.0904		-22.7734	-5.4276	0.055804
4-5	0.00831241	9.71e-07	0.0489574	1.71e-06	8.65285	0.0831		-22.7971	-5.45178	0.0582699
4-5	0.00831139	7.76e-07	0.0489565	1.72e-06	8.7125	0.0894		-22.8147	-5.46965	0.0583929
nbs123	0.00840841	8.33e-07	0.0500985	1.8e-06	9.20792	0.0893
4-5	0.00831131	9.58e-07	0.0489608	1.47e-06	8.49959	0.081		-22.7885	-5.44304	0.0550434
4-5	0.00830939	8.43e-07	0.0489567	1.57e-06	8.62402	0.0875		-22.8712	-5.52714	0.0561851
4-5	0.00830962	8.08e-07	0.0489593	1.77e-06	8.69071	0.087		-22.8195	-5.47453	0.0586117
nbs123	0.00840928	8.8e-07	0.0501067	1.45e-06	9.09573	0.0894
4-5	0.00831221	8.52e-07	0.0489615	1.64e-06	8.54051	0.0786		-22.795	-5.44959	0.054005
4-5	0.00831219	8.6e-07	0.048964	1.58e-06	8.67467	0.0856		-22.7441	-5.3978	0.0532526
4-5	0.00831167	8.73e-07	0.0489655	1.87e-06	8.53804	0.0798		-22.7145	-5.36773	0.0570356
nbs123	0.00841134	8.23e-07	0.0501004	1.55e-06	9.0131	0.086
4-6	0.0083126	7.08e-07	0.0489642	1.57e-06	8.47065	0.0774		-22.6846	-5.33725	0.0554065
4-6	0.00831208	7.8e-07	0.0489663	1.28e-06	8.57898	0.0806		-22.6429	-5.2948	0.0522024
4-6	0.00831114	9.16e-07	0.0489644	1.49e-06	8.54348	0.0862		-22.6804	-5.33299	0.0544772
nbs123	0.00840797	8.76e-07	0.050101	1.65e-06	9.04966	0.0894
4-6	0.00831077	8.72e-07	0.0489638	1.56e-06	8.6756	0.09		-22.8032	-5.45794	0.0549521
4-6	0.00830976	8.43e-07	0.048969	1.52e-06	8.68926	0.0879		-22.6998	-5.35273	0.0544807
4-6	0.00831131	9.15e-07	0.0489677	1.75e-06	8.48838	0.0855		-22.7248	-5.37812	0.0572874
nbs123	0.0084109	8.63e-07	0.0501117	1.52e-06	8.95064	0.0914
4-6	0.00831007	8.67e-07	0.0489678	1.59e-06	8.67949	0.0819		-22.791	-5.44555	0.0553053
4-6	0.00830805	9.16e-07	0.0489673	1.59e-06	8.57736	0.08		-22.8014	-5.45611	0.0553055
4-6	0.00830978	8.49e-07	0.0489725	1.41e-06	8.64832	0.086		-22.6974	-5.35029	0.0532289
nbs123	0.00840834	7.62e-07	0.0501081	1.65e-06	9.08988	0.0893
4-7	0.00831015	8.05e-07	0.0489737	1.62e-06	8.66241	0.0789		-22.7534	-5.40724	0.0593827
4-7	0.00831036	9.36e-07	0.0489728	1.58e-06	8.62383	0.0801		-22.7697	-5.42389	0.0589319
4-7	0.00831237	8.86e-07	0.0489681	1.54e-06	8.6077	0.0872		-22.8649	-5.52076	0.0584904
nbs123	0.00841203	9.04e-07	0.0501198	1.84e-06	8.49361	0.11
4-7	0.00831131	9.3e-07	0.0489728	1.5e-06	8.3446	0.0849		-22.9318	-5.58887	0.0546806
4-7	0.00831143	8.16e-07	0.0489748	1.72e-06	8.3653	0.0869		-22.8935	-5.54989	0.057317
4-7	0.00831095	9.49e-07	0.048975	1.46e-06	8.46216	0.0841		-22.8887	-5.54501	0.0542266
nbs123	0.00841222	7.84e-07	0.0501247	1.33e-06	8.87833	0.0797
4-7	0.00831112	9.17e-07	0.0489805	1.76e-06	8.36824	0.088		-22.821	-5.47612	0.0566935
4-7	0.00830995	8.93e-07	0.0489793	1.72e-06	8.49821	0.0821		-22.845	-5.50048	0.05618
4-7	0.00831218	8.79e-07	0.0489782	1.55e-06	8.52434	0.087		-22.8667	-5.52261	0.0540787
nbs123	0.00840894	8.97e-07	0.050124	1.75e-06	8.89905	0.0924
3-4	0.00830903	8.21e-07	0.0489771	1.52e-06	8.43906	0.082		-22.9312	-5.58827	0.0559095
3-4	0.00831049	7.64e-07	0.0489813	1.73e-06	8.38162	0.0794		-22.8486	-5.50421	0.0583967
3-4	0.00831011	9.42e-07	0.0489805	1.97e-06	8.36383	0.0811		-22.864	-5.51984	0.0614846
nbs123	0.00841274	8.41e-07	0.0501292	1.54e-06	8.62784	0.0814
3-4	0.00831021	9.33e-07	0.0489817	1.91e-06	8.39956	0.0803		-22.8241	-5.47921	0.059565
3-4	0.00831046	9.74e-07	0.0489794	1.63e-06	8.53407	0.0855		-22.8708	-5.52672	0.0559907
3-4	0.00831053	9.05e-07	0.0489804	1.71e-06	8.36051	0.0892		-22.8508	-5.50642	0.0569762
nbs123	0.00841193	8.07e-07	0.0501223	1.65e-06	8.65868	0.0839
3-4	0.00831243	9.07e-07	0.0489827	1.99e-06	8.36706	0.0869		-22.7867	-5.44117	0.0632071
3-4	0.008313	9.37e-07	0.0489846	1.71e-06	8.43318	0.0826		-22.747	-5.40077	0.059693
3-4	0.0083116	8.97e-07	0.0489882	1.58e-06	8.39127	0.081		-22.675	-5.32747	0.0581795
nbs123	0.008409	7.62e-07	0.0501273	1.78e-06	8.61916	0.0866
3-5	0.00831171	9.46e-07	0.0489819	1.61e-06	8.35754	0.0791		-22.9039	-5.56047	0.0595479
3-5	0.00831264	8.7e-07	0.0489817	1.83e-06	8.393	0.079		-22.9081	-5.56474	0.0621402
3-5	0.00831199	9.95e-07	0.0489851	1.57e-06	8.32905	0.0759		-22.8399	-5.4953	0.0590999
nbs123	0.00841067	8.49e-07	0.0501328	1.74e-06	8.70453	0.0798
											-5.42691	0.222475		measurement repeatability	analytical uncertainty	H-index
														0.222475	0.355553	0.625714
2022.07
nbs123	0.00840684	1.85e-06	0.0500324	2.58e-06	4.87034	0.0332
1-1	0.00830302	1.77e-06	0.0488893	2.52e-06	4.66565	0.0387		-22.815	-5.46995	0.0936453
1-1	0.00832995	1.55e-06	0.0488899	2.34e-06	4.52263	0.038		-22.8026	-5.45734	0.0916699
1-1	0.00834251	1.46e-06	0.0488851	2.42e-06	4.57767	0.0378		-22.8973	-5.55376	0.0925374
nbs123	0.00840255	2.04e-06	0.050029	2.94e-06	4.43422	0.0733
1-1	0.00833008	1.62e-06	0.0488881	2.24e-06	4.63865	0.0386		-22.7902	-5.44477	0.0893896
1-1	0.00831677	1.45e-06	0.0488846	2.44e-06	4.62396	0.0403		-22.8588	-5.51455	0.0915558
1-1	0.00831447	1.75e-06	0.0488774	2.46e-06	4.56989	0.0374		-23.0037	-5.66204	0.0917836
nbs123	0.00839288	1.93e-06	0.0500274	2.47e-06	4.78569	0.034
1-1	0.00825586	2.07e-06	0.0488856	2.38e-06	4.61407	0.0353		-22.8176	-5.47266	0.0845457
1-1	0.0083012	1.81e-06	0.048886	2.24e-06	4.64831	0.0358		-22.8086	-5.4635	0.0829294
1-1	0.00830506	1.63e-06	0.0488903	2.22e-06	4.61956	0.0354		-22.7223	-5.37561	0.0827019
nbs123	0.008405	1.84e-06	0.0500267	2.42e-06	4.84997	0.0352
1-1	0.00828433	1.84e-06	0.0488877	2.26e-06	4.6506	0.0361		-22.7334	-5.38688	0.0805128
1-1	0.00828835	2.27e-06	0.048888	2.43e-06	4.64716	0.0359		-22.727	-5.38037	0.0825583
1-1	0.00830575	1.91e-06	0.0488869	2.41e-06	4.64679	0.037		-22.7496	-5.40335	0.0823133
nbs123	0.00840974	1.35e-06	0.0500232	2.24e-06	4.88026	0.038
1-2	0.00832298	1.6e-06	0.0488877	2.44e-06	4.5892	0.0376		-22.7298	-5.38329	0.0832707
1-2	0.00830502	1.66e-06	0.0488877	2.3e-06	4.58791	0.0354		-22.7308	-5.38431	0.0815865
1-2	0.00829824	1.69e-06	0.0488843	2.23e-06	4.52909	0.0351		-22.7978	-5.45246	0.080771
nbs123	0.00839976	1.56e-06	0.0500264	2.47e-06	4.8267	0.037
1-2	0.00828547	2.18e-06	0.0488857	2.23e-06	4.6129	0.0385		-22.8078	-5.46264	0.0822374
1-2	0.00828818	1.94e-06	0.0488925	2.39e-06	4.58308	0.038		-22.6721	-5.3245	0.084093
1-2	0.00823258	2.41e-06	0.0488875	2.34e-06	4.57634	0.0365		-22.7724	-5.42663	0.0835055
nbs123	0.00836535	2.22e-06	0.0500271	2.37e-06	4.79393	0.0368
1-2	0.00824061	3.46e-06	0.0488869	2.24e-06	4.56568	0.0367		-22.8186	-5.47362	0.0787897
1-2	0.00827847	1.81e-06	0.0488842	2.35e-06	4.56583	0.0369		-22.872	-5.52794	0.0801207
1-2	0.00829114	1.83e-06	0.048893	2.27e-06	4.57928	0.0361		-22.6979	-5.35075	0.0791447
nbs123	0.00839596	1.92e-06	0.0500299	2.16e-06	4.8344	0.0371
1-2	0.00830007	1.67e-06	0.0488897	2.63e-06	4.50467	0.0328		-22.7354	-5.38894	0.0862468
1-2	0.00826926	1.93e-06	0.0488926	2.49e-06	4.63303	0.0345		-22.6774	-5.32994	0.0844885
1-2	0.00826277	2.26e-06	0.0488845	2.55e-06	4.55171	0.0367		-22.8381	-5.49351	0.0852391
nbs123	0.00835405	2.67e-06	0.0500243	2.59e-06	4.79007	0.0358
1-3	0.00827194	2.22e-06	0.0488866	2.62e-06	4.60142	0.0355		-22.7825	-5.43689	0.0866275
1-3	0.00829137	1.75e-06	0.0488883	2.46e-06	4.57644	0.0349		-22.7485	-5.40231	0.0846407
1-3	0.00822861	2.12e-06	0.048887	2.55e-06	4.57562	0.0363		-22.7753	-5.42957	0.0857487
nbs123	0.0083464	2.29e-06	0.0500284	2.21e-06	4.83806	0.0398
1-3	0.00826357	1.99e-06	0.0488858	2.49e-06	4.53734	0.035		-22.7692	-5.42334	0.0814964
1-3	0.00828786	2.08e-06	0.048882	2.51e-06	4.57855	0.0328		-22.8456	-5.50106	0.0817552
1-3	0.00830458	1.67e-06	0.048881	2.3e-06	4.53424	0.0332		-22.8647	-5.52059	0.0791282
nbs123	0.00840841	1.38e-06	0.0500213	2.29e-06	4.73909	0.0328
1-3	0.00828501	2.15e-06	0.0488917	2.7e-06	4.582	0.0356		-22.558	-5.20845	0.0887037
1-3	0.00829606	1.65e-06	0.0488858	2.46e-06	4.58226	0.0342		-22.6768	-5.32931	0.0857373
1-3	0.00823178	2.72e-06	0.0488883	2.6e-06	4.49814	0.0352		-22.6258	-5.27743	0.0874472
nbs123	0.00832765	2.04e-06	0.0500188	2.61e-06	4.88849	0.0374
1-3	0.00825925	1.74e-06	0.0488926	2.42e-06	4.54685	0.0309		-22.6056	-5.25687	0.087237
1-3	0.00825212	2.09e-06	0.0488882	2.02e-06	4.5448	0.0317		-22.693	-5.34578	0.0828713
1-3	0.00827248	1.94e-06	0.0488905	2.51e-06	4.59997	0.0384		-22.6464	-5.29838	0.0882957
nbs123	0.00826396	3.21e-06	0.050028	2.47e-06	4.75389	0.0363
2-1	0.00818468	2.53e-06	0.0488852	2.16e-06	4.48133	0.0366		-22.8774	-5.53347	0.0825079
2-1	0.00823224	2.09e-06	0.0488913	2.29e-06	4.49742	0.031		-22.7555	-5.40937	0.0839588
2-1	0.00823707	2.38e-06	0.0488831	2.45e-06	4.55082	0.034		-22.9194	-5.57619	0.0858324
nbs123	0.00831821	3.33e-06	0.0500315	2.46e-06	4.7219	0.0388
2-1	0.00822204	2.32e-06	0.0488922	2.53e-06	4.52065	0.0345		-22.725	-5.37836	0.0884152
2-1	0.00821746	2.55e-06	0.0488935	2.67e-06	4.48261	0.0323		-22.6986	-5.35151	0.0901201
2-1	0.00821659	2.75e-06	0.0488946	2.38e-06	4.59484	0.0341		-22.6758	-5.32832	0.0866539
nbs123	0.00835324	1.83e-06	0.0500266	2.61e-06	4.7702	0.0392
2-1	0.00818843	4.14e-06	0.0488837	2.39e-06	4.55329	0.0322		-22.8534	-5.50904	0.0859923
2-1	0.00819811	2.74e-06	0.0488871	2.28e-06	4.61148	0.0388		-22.7848	-5.43926	0.0847314
2-1	0.0082224	2.13e-06	0.0488859	2.58e-06	4.56224	0.0363		-22.808	-5.46286	0.0882587
nbs123	0.00828181	3.38e-06	0.0500273	2.39e-06	4.74745	0.0359
2-2	0.00817594	3.2e-06	0.0488828	2.2e-06	4.57805	0.034		-22.8271	-5.48229	0.0839713
2-2	0.00818435	2.9e-06	0.0488966	2.52e-06	4.42138	0.0316		-22.552	-5.20234	0.0876457
2-2	0.00821134	2.11e-06	0.0488891	2.11e-06	4.52317	0.0326		-22.7012	-5.35412	0.0829962
nbs123	0.0082531	2.66e-06	0.0500222	2.62e-06	4.74395	0.0376
2-2	0.00816608	3.69e-06	0.0488864	2.41e-06	4.55655	0.0362		-22.8019	-5.45667	0.087467
2-2	0.00817459	2.38e-06	0.0488791	2.42e-06	4.55102	0.0324		-22.9469	-5.60417	0.0875866
2-2	0.00818217	3.03e-06	0.0488795	2.38e-06	4.53964	0.0358		-22.9405	-5.59766	0.0871265
nbs123	0.00825392	4.3e-06	0.050032	2.49e-06	4.56356	0.0519
2-2	0.0082278	3.17e-06	0.0488854	2.31e-06	4.57498	0.0342		-22.962	-5.61955	0.083047
2-2	0.00815753	3.2e-06	0.0488938	2.2e-06	4.52669	0.0352		-22.7927	-5.44726	0.0817833
2-2	0.00814526	2.69e-06	0.0488856	2.39e-06	4.50159	0.0346		-22.9578	-5.61528	0.0839888
nbs123	0.0082676	2.95e-06	0.0500365	2.34e-06	4.80136	0.0359
2-2	0.00820919	3.43e-06	0.0488906	2.17e-06	4.5755	0.0336		-22.8274	-5.48256	0.077485
2-2	0.00821788	2.92e-06	0.048883	2.27e-06	4.55612	0.0357		-22.9781	-5.63594	0.0786787
2-2	0.00823415	2.36e-06	0.0488868	2.73e-06	4.48902	0.0333		-22.9029	-5.55945	0.0845718
nbs123	0.00832419	2.17e-06	0.0500289	2.15e-06	4.77226	0.041
2-3	0.00826636	1.94e-06	0.0488833	2.42e-06	4.41799	0.0335		-22.9314	-5.58844	0.0814692
2-3	0.00821352	2.58e-06	0.0488858	2.36e-06	4.48423	0.0289		-22.8796	-5.53575	0.0807277
2-3	0.00818036	3.16e-06	0.0488846	2.24e-06	4.50126	0.0352		-22.9046	-5.56118	0.0792849
nbs123	0.00830145	3.61e-06	0.0500321	2.42e-06	4.66726	0.0375
2-3	0.00817842	2.68e-06	0.0488864	2.24e-06	4.43772	0.0349		-22.867	-5.52287	0.0821001
2-3	0.00818577	2.73e-06	0.0488856	2.55e-06	4.41574	0.0326		-22.8824	-5.53854	0.0858012
2-3	0.00818298	3.61e-06	0.0488882	2.24e-06	4.51069	0.0345		-22.8314	-5.48666	0.0820992
nbs123	0.00828812	2.3e-06	0.0500287	2.4e-06	4.75307	0.0362
nbs123	0.00863729	1.63e-06	0.0500719	3.75e-06	7.5044	0.0897
2-3	0.00853163	1.03e-06	0.0489272	3.45e-06	8.29357	0.058		-22.7135	-5.36665	0.116615
2-3	0.00851182	8.93e-07	0.0489316	3.05e-06	8.51299	0.0578		-22.6246	-5.27618	0.111858
2-3	0.00848469	9.29e-07	0.0489263	2.91e-06	8.60546	0.062		-22.7317	-5.38515	0.110293
nbs123	0.00853843	8.77e-07	0.0500567	2.75e-06	9.05339	0.0794
2-3	0.00839495	8.67e-07	0.048936	2.09e-06	8.59742	0.0604		-22.756	-5.40997	0.0813409
2-3	0.00839167	7.64e-07	0.0489399	2.03e-06	8.6912	0.0641		-22.6784	-5.33091	0.0807022
2-3	0.0083823	9.12e-07	0.0489407	2.11e-06	8.59037	0.0624		-22.6622	-5.31444	0.081554
nbs123	0.00846432	8.58e-07	0.0500942	2.11e-06	8.79113	0.0745
2-3	0.00836673	8.98e-07	0.0489496	2.16e-06	8.5213	0.0639		-22.9772	-5.63506	0.0723591
2-3	0.00836518	7.65e-07	0.0489532	2.2e-06	8.57027	0.0591		-22.9052	-5.56172	0.0728583
2-3	0.00836016	7.95e-07	0.0489549	1.94e-06	8.52648	0.0625		-22.8714	-5.52739	0.0697069
nbs123	0.00845211	7.76e-07	0.0501072	1.95e-06	8.56139	0.0647
2-3	0.00835434	7.93e-07	0.0489611	2e-06	8.27413	0.0595		-22.8962	-5.55265	0.0665642
2-3	0.00835291	7.02e-07	0.0489595	2.11e-06	8.40378	0.0591		-22.9288	-5.58576	0.067967
2-3	0.00835203	7.88e-07	0.0489636	1.59e-06	8.18401	0.0574		-22.8478	-5.5033	0.0617793
nbs123	0.00844349	8.5e-07	0.0501096	1.77e-06	8.41797	0.0521
1-3	0.0083432	8.6e-07	0.0489745	2.05e-06	8.02812	0.0517		-22.8128	-5.46777	0.0652749
1-3	0.00834335	8.7e-07	0.0489696	1.88e-06	8.14016	0.0614		-22.9102	-5.56687	0.0631075
1-3	0.00834542	8.94e-07	0.048972	1.86e-06	8.03841	0.0599		-22.8631	-5.51895	0.0628588
nbs123	0.00843623	8.22e-07	0.050126	1.78e-06	8.34311	0.0409
1-3	0.00833698	8.94e-07	0.0489787	1.75e-06	7.97935	0.0567		-22.8687	-5.52464	0.0631636
1-3	0.00833575	9.16e-07	0.0489821	1.78e-06	7.98726	0.0545		-22.8017	-5.45641	0.0635107
1-3	0.00833399	7.88e-07	0.0489831	1.8e-06	8.02417	0.0532		-22.7815	-5.43591	0.0637447
nbs123	0.00842846	8.49e-07	0.050124	1.91e-06	7.82183	0.0964
1-3	0.0083322	8.6e-07	0.0489921	1.74e-06	7.76796	0.0478		-22.771	-5.42517	0.0641801
1-3	0.00833312	9.3e-07	0.0489897	1.46e-06	7.70899	0.0556		-22.8199	-5.47491	0.0612036
1-3	0.00833132	8.16e-07	0.0489874	1.85e-06	7.50379	0.0523		-22.8649	-5.52079	0.0654514
nbs123	0.00842655	8.75e-07	0.0501434	1.88e-06	8.01652	0.0684
2-1	0.00832808	8.99e-07	0.0489982	1.86e-06	7.83377	0.0544		-22.7485	-5.40226	0.0936734
2-1	0.00833017	9.11e-07	0.0489959	1.68e-06	7.8124	0.0551		-22.7943	-5.44895	0.0922464
2-1	0.00832763	8.02e-07	0.0489894	1.9e-06	7.66992	0.0525		-22.9228	-5.57967	0.09401
nbs123	0.00842388	1.35e-06	0.050134	3.86e-06	8.21558	0.156
2-1	0.00832688	8.47e-07	0.0489969	1.61e-06	7.76882	0.0512		-22.743	-5.3967	0.0914827
2-1	0.00832615	8.94e-07	0.0489974	1.82e-06	7.69808	0.0545		-22.7328	-5.38634	0.093108
2-1	0.00832764	8.64e-07	0.0489974	1.57e-06	7.63461	0.0546		-22.7328	-5.38634	0.0911926
nbs123	0.00842276	7.77e-07	0.0501403	1.85e-06	8.00754	0.0573
2-1	0.00832488	9.29e-07	0.0489995	1.43e-06	7.3166	0.056		-22.7402	-5.39382	0.0588156
2-1	0.00832711	8.79e-07	0.048996	1.74e-06	7.40523	0.0534		-22.8088	-5.46364	0.0621993
2-1	0.00832359	9e-07	0.0489987	1.73e-06	7.33444	0.0519		-22.7555	-5.40945	0.0620819
nbs123	0.00842215	8.6e-07	0.050139	1.77e-06	7.68641	0.0507
2-2	0.00832599	8.17e-07	0.0489999	1.62e-06	7.32003	0.0526		-22.8038	-5.45858	0.0590633
2-2	0.00832473	9.46e-07	0.0490019	1.71e-06	7.36901	0.0568		-22.7637	-5.41778	0.0601098
2-2	0.00832582	9.38e-07	0.0489983	1.59e-06	7.2501	0.0476		-22.8353	-5.49065	0.0587233
nbs123	0.00842045	8.53e-07	0.0501477	1.7e-06	7.56207	0.0556
2-2	0.0083245	8.98e-07	0.0490059	1.61e-06	7.43166	0.0519		-22.7693	-5.4235	0.0581183
2-2	0.00832229	8.59e-07	0.0490044	1.75e-06	7.41707	0.0514		-22.7981	-5.45272	0.0597803
2-2	0.0083227	9.12e-07	0.049001	1.7e-06	7.43013	0.0572		-22.8671	-5.52294	0.0591779
nbs123	0.00842045	8.53e-07	0.0501477	1.7e-06	7.56207	0.0556
2-2	0.00832191	8.93e-07	0.0490015	1.62e-06	7.3251	0.0493		-22.8279	-5.48305	0.0580055
2-2	0.00832272	8.08e-07	0.0490053	1.67e-06	7.21694	0.045		-22.7507	-5.40451	0.0585915
2-2	0.00832075	9.73e-07	0.0490001	1.68e-06	7.30132	0.0475		-22.8544	-5.51004	0.0587125
nbs123	0.00842056	8.37e-07	0.0501447	1.68e-06	7.58881	0.0552
2-3	0.00832131	8.85e-07	0.0490036	1.83e-06	7.30083	0.0494		-22.93	-5.58698	0.0627427
2-3	0.00832048	8.8e-07	0.0490029	1.66e-06	7.31042	0.0505		-22.9431	-5.60037	0.0607421
2-3	0.00832424	8.9e-07	0.0490026	1.72e-06	7.22793	0.046		-22.9487	-5.60605	0.0614335
nbs123	0.00842388	1.19e-06	0.0501625	1.89e-06	7.12747	0.0921
2-3	0.00832015	8.61e-07	0.0490084	1.7e-06	7.31437	0.0519		-22.815	-5.47001	0.0604466
2-3	0.00832	8.18e-07	0.049009	1.58e-06	7.25056	0.0513		-22.8033	-5.45804	0.0590753
2-3	0.00832025	7.87e-07	0.049008	1.67e-06	7.26601	0.0501		-22.824	-5.47914	0.0600976
nbs123	0.00841992	8.77e-07	0.0501428	1.61e-06	7.74314	0.0439
2-3	0.00832003	8.18e-07	0.0490049	1.83e-06	7.21992	0.054		-22.7631	-5.41718	0.0592279
2-3	0.0083184	9.57e-07	0.0490039	1.67e-06	7.26564	0.0496		-22.7843	-5.43869	0.0572259
2-3	0.00832287	8.17e-07	0.0490055	1.72e-06	7.28979	0.0502		-22.7518	-5.40561	0.0578387
nbs123	0.0084202	8.4e-07	0.0501501	1.65e-06	7.43007	0.0526
3-1	0.00831823	8.54e-07	0.0490049	1.73e-06	7.12095	0.0477		-22.9183	-5.57506	0.0589701
3-1	0.00831924	8.72e-07	0.0490053	1.6e-06	7.09921	0.0517		-22.9097	-5.56634	0.0574211
3-1	0.00832001	7.94e-07	0.0490038	1.65e-06	7.15381	0.0528		-22.9388	-5.59597	0.0580079
nbs123	0.00841885	9.1e-07	0.0501586	1.7e-06	7.02343	0.0767
3-1	0.00831941	9.2e-07	0.0490058	1.52e-06	7.16021	0.0478		-22.8627	-5.51851	0.0642179
3-1	0.0083238	9.82e-07	0.0490066	1.73e-06	7.0963	0.0482		-22.8467	-5.50228	0.0663935
3-1	0.00831965	8.86e-07	0.0490041	1.72e-06	7.09574	0.0501		-22.8972	-5.55362	0.0662861
nbs123	0.00842279	1.02e-06	0.0501463	2.25e-06	5.83354	0.0926
3-1	0.00831911	9.08e-07	0.0490071	1.65e-06	7.04248	0.0479		-22.8455	-5.50097	0.0688231
3-1	0.00832006	9.29e-07	0.0490093	1.66e-06	7.13369	0.0486		-22.8016	-5.45632	0.0689224
3-1	0.00831988	8.67e-07	0.0490052	1.46e-06	7.14994	0.0497		-22.8837	-5.53993	0.0670124
nbs123	0.0084205	1.05e-06	0.0501594	2e-06	7.06371	0.0872
3-2	0.00832094	9.12e-07	0.0490057	1.6e-06	7.11695	0.0474		-22.874	-5.52998	0.0621273
3-2	0.00832146	8.52e-07	0.049007	1.6e-06	7.12618	0.051		-22.8479	-5.5034	0.0621269
3-2	0.00832074	8.75e-07	0.0490063	1.54e-06	7.21126	0.0491		-22.8622	-5.51801	0.0614925
nbs123	0.00841919	9.31e-07	0.0501463	1.74e-06	7.49469	0.0418
3-2	0.00831789	9.82e-07	0.0490071	1.83e-06	7.09483	0.0468		-22.713	-5.36619	0.0616634
3-2	0.0083215	8.51e-07	0.0490079	1.59e-06	7.12229	0.0475		-22.6971	-5.34995	0.0588267
3-2	0.00831973	8.34e-07	0.0490099	1.6e-06	7.19312	0.0473		-22.6578	-5.30997	0.0589388
nbs123	0.00841732	8.5e-07	0.0501459	1.74e-06	7.37452	0.0513
3-2	0.00831891	9.32e-07	0.0490079	1.77e-06	7.05537	0.0461		-22.9036	-5.56015	0.0640136
3-2	0.00832119	8.99e-07	0.0490065	1.62e-06	7.11693	0.0525		-22.9323	-5.58937	0.0623385
3-2	0.00832216	9.4e-07	0.0490031	1.68e-06	7.06428	0.0477		-23.0003	-5.65857	0.0629976
nbs123	0.00841973	1.04e-06	0.0501675	2e-06	7.38178	0.0628
4-1	0.00831845	9.29e-07	0.0490084	1.64e-06	7.12303	0.0472		-22.9185	-5.57529	0.060946
4-1	0.00831844	8.42e-07	0.0490056	1.69e-06	7.19919	0.0485		-22.9747	-5.63251	0.0615132
4-1	0.00831822	8.94e-07	0.0490105	1.79e-06	7.21988	0.0481		-22.877	-5.53308	0.0626778
nbs123	0.00841892	8.38e-07	0.0501485	1.59e-06	7.37173	0.0481
4-1	0.00831917	8.91e-07	0.0490064	1.54e-06	7.15563	0.0467		-22.8365	-5.49187	0.0579078
4-1	0.0083166	7.78e-07	0.0490056	1.54e-06	7.15973	0.0467		-22.8521	-5.5077	0.0579081
4-1	0.00832011	8.76e-07	0.0490078	1.67e-06	7.23333	0.0513		-22.8076	-5.46245	0.0593886
nbs123	0.00841743	9.65e-07	0.0501549	1.85e-06	7.30362	0.0635
4-1	0.00831829	9.05e-07	0.0490098	1.59e-06	7.1602	0.0478		-22.7293	-5.38279	0.0589043
4-1	0.00831859	8.92e-07	0.0490037	1.66e-06	7.1972	0.0492		-22.8524	-5.50801	0.0597053
4-1	0.0083185	8.13e-07	0.0490071	1.64e-06	7.14683	0.0464		-22.7828	-5.43718	0.0594733
nbs123	0.00841931	8.66e-07	0.0501445	1.63e-06	7.33052	0.0541
4-2	0.00831815	9.01e-07	0.0490066	1.68e-06	7.17072	0.0441		-22.7858	-5.44022	0.0694038
4-2	0.00831946	1.03e-06	0.0490037	1.65e-06	7.17432	0.0483		-22.843	-5.49847	0.0691044
4-2	0.0083177	9.33e-07	0.0490042	1.78e-06	7.18877	0.05		-22.834	-5.48934	0.070435
nbs123	0.00841707	1.13e-06	0.050154	2.55e-06	6.91273	0.0561
4-2	0.00831701	1.06e-06	0.0490044	1.54e-06	7.14027	0.0496		-22.9311	-5.58817	0.0718523
4-2	0.00831871	9.37e-07	0.0490065	1.71e-06	7.22377	0.0447		-22.8889	-5.54515	0.0734351
4-2	0.00831718	9.22e-07	0.0490053	1.74e-06	7.22907	0.0463		-22.9132	-5.56991	0.0737284
nbs123	0.0084179	1.07e-06	0.050155	2e-06	6.24493	0.0617
4-2	0.00831757	9.38e-07	0.0490022	1.57e-06	7.13086	0.0451		-22.9578	-5.61527	0.0603921
4-2	0.00831471	1.04e-06	0.0490057	1.71e-06	7.04957	0.0475		-22.8884	-5.54465	0.0619537
4-2	0.00831305	9.25e-07	0.0490046	1.63e-06	7.08395	0.0503		-22.9109	-5.56758	0.0610496
nbs123	0.00841573	7.41e-07	0.0501523	1.61e-06	7.25058	0.0515
4-3	0.00831889	9.51e-07	0.0490034	1.47e-06	7.04167	0.0414		-22.8592	-5.51497	0.0554946
4-3	0.00831879	8.95e-07	0.0490057	1.67e-06	6.97587	0.0485		-22.8142	-5.4691	0.0578019
4-3	0.00831819	9.07e-07	0.0490015	1.57e-06	6.99064	0.0451		-22.8963	-5.55271	0.0566244
nbs123	0.00841621	9.07e-07	0.0501473	1.7e-06	7.2742	0.0497
4-3	0.00831626	9.23e-07	0.0490011	1.58e-06	6.95667	0.043		-22.922	-5.5789	0.0554211
4-3	0.00831614	9.06e-07	0.0489997	1.6e-06	6.97436	0.0451		-22.9496	-5.60691	0.0556601
4-3	0.00831771	9.55e-07	0.0490051	1.68e-06	6.99369	0.0453		-22.8421	-5.49752	0.0566311
nbs123	0.00841653	9.41e-07	0.050154	1.49e-06	7.20858	0.0485
4-3	0.00831694	9.08e-07	0.0490029	1.43e-06	6.93229	0.0454		-22.9182	-5.57498	0.0533203
4-3	0.00831729	9.09e-07	0.0490032	1.82e-06	6.94456	0.0463		-22.913	-5.56971	0.0580593
4-3	0.0083165	9.43e-07	0.0490054	1.76e-06	6.82952	0.0479		-22.8691	-5.52506	0.0572827
nbs123	0.00841684	9.28e-07	0.0501506	1.67e-06	7.00755	0.0491
											-5.475	0.185657
2022.08
nbs123	0.00842432	7.28e-07	0.0500657	1.61e-06	8.76903	0.0959
2-7	0.00832216	9.6e-07	0.0489335	1.91e-06	8.08549	0.0864		-22.6679	-5.32024	0.0585776
2-7	0.00832459	7.99e-07	0.0489221	1.63e-06	8.17658	0.0944		-22.8942	-5.55055	0.0549354
2-7	0.00832296	7.08e-07	0.0489318	1.53e-06	8.21307	0.0853		-22.7012	-5.35418	0.0537167
nbs123	0.00842142	8.01e-07	0.0500711	1.48e-06	8.6501	0.0784
2-7	0.00832111	8.39e-07	0.0489269	1.64e-06	8.10261	0.0867		-22.8326	-5.48783	0.0545935
2-7	0.00832363	8.92e-07	0.0489294	1.85e-06	8.11764	0.0843		-22.784	-5.43844	0.0573278
2-7	0.00832266	9.16e-07	0.0489284	1.59e-06	8.13948	0.0878		-22.8046	-5.45937	0.0539716
nbs123	0.00842217	9.14e-07	0.0500693	1.57e-06	8.62528	0.0905
2-7	0.00832314	8.51e-07	0.0489273	1.71e-06	8.00646	0.0821		-22.7928	-5.44733	0.0588953
2-7	0.00832347	9.23e-07	0.0489306	1.72e-06	7.9753	0.0819		-22.7273	-5.38066	0.0590154
2-7	0.00832207	9.67e-07	0.048929	1.68e-06	7.98214	0.0797		-22.7594	-5.41339	0.0585328
nbs123	0.00842173	8.74e-07	0.0500678	1.78e-06	8.54626	0.093
nbs123	0.00842182	7.18e-07	0.0500804	1.86e-06	8.87967	0.0909
2-7	0.00831992	7.81e-07	0.0489305	1.32e-06	11.0935	0.141		-22.8274	-5.48259	0.0548157
2-7	0.00831866	6.47e-07	0.0489281	1.38e-06	11.0913	0.145		-22.8763	-5.53239	0.0554302
2-7	0.00831992	6.04e-07	0.0489265	1.41e-06	11.3163	0.146		-22.9075	-5.5641	0.0557451
nbs123	0.00841936	9.32e-07	0.0500667	1.5e-06	8.74042	0.0886
2-7	0.00831954	6.63e-07	0.0489281	1.2e-06	11.1279	0.153		-22.781	-5.43533	0.0554858
2-7	0.00831883	6.81e-07	0.0489294	1.29e-06	11.2	0.136		-22.7558	-5.40972	0.0563228
2-7	0.00832109	7.77e-07	0.0489304	1.39e-06	11.2305	0.144		-22.7356	-5.38919	0.0573076
nbs123	0.00841924	8.6e-07	0.0500708	1.99e-06	8.83608	0.0844
2-4	0.00832021	9.83e-07	0.0489324	1.51e-06	8.4143	0.0876		-22.7793	-5.43367	0.0575628
2-4	0.00832149	9.16e-07	0.0489274	1.78e-06	8.39432	0.0864		-22.8792	-5.53529	0.0607021
2-4	0.00831917	8.92e-07	0.0489335	1.69e-06	8.34366	0.0886		-22.7564	-5.41029	0.0596153
nbs123	0.00841936	8.85e-07	0.0500753	1.4e-06	8.54761	0.0977
2-4	0.00831993	9.31e-07	0.0489308	1.62e-06	8.28918	0.0842		-22.8537	-5.5093	0.0527929
2-4	0.00832032	7.85e-07	0.0489306	1.67e-06	8.16979	0.0869		-22.8568	-5.51256	0.0534398
2-4	0.00832048	9.51e-07	0.0489289	1.77e-06	8.20398	0.0862		-22.8902	-5.5465	0.0547684
nbs123	0.00841801	9.87e-07	0.0500751	1.51e-06	8.72579	0.0844
2-4	0.00831863	8.7e-07	0.048929	1.51e-06	8.25903	0.0888		-22.8841	-5.54031	0.055026
2-4	0.00832185	8.3e-07	0.0489313	1.54e-06	8.20085	0.0906		-22.839	-5.49437	0.0553714
2-4	0.00832241	8.84e-07	0.0489269	1.82e-06	8.31903	0.0856		-22.9261	-5.58299	0.0588148
nbs123	0.0084218	9.05e-07	0.0500748	1.71e-06	8.5662	0.0851
2-4	0.00832297	8.72e-07	0.0489299	1.66e-06	8.31932	0.08		-22.8875	-5.54377	0.0574461
2-4	0.00831978	8.28e-07	0.0489281	1.8e-06	8.23481	0.0812		-22.9237	-5.58055	0.0591818
2-4	0.00832205	9.46e-07	0.0489278	1.61e-06	8.19289	0.085		-22.9298	-5.58685	0.0568494
nbs123	0.0084191	8.54e-07	0.0500772	1.57e-06	8.50661	0.0833
2-4	0.00832284	8.29e-07	0.0489347	1.56e-06	8.16138	0.0809		-22.7771	-5.43141	0.0571215
2-4	0.00832149	7.99e-07	0.0489317	1.56e-06	8.17803	0.0728		-22.8376	-5.493	0.0571226
2-4	0.0083232	9.29e-07	0.048928	1.68e-06	8.15512	0.0841		-22.9101	-5.56677	0.0585282
nbs123	0.00842094	8.65e-07	0.0500733	1.78e-06	8.49502	0.0825
2-4	0.00832196	8.92e-07	0.0489327	2.15e-06	8.16364	0.0829		-22.7639	-5.41794	0.0630551
2-4	0.00832192	9.04e-07	0.0489322	1.74e-06	8.30426	0.0892		-22.7735	-5.4277	0.0575315
2-4	0.00832094	8.99e-07	0.0489257	1.74e-06	8.19848	0.0814		-22.9023	-5.5588	0.0575344
nbs123	0.00842067	8.81e-07	0.0500718	1.4e-06	8.69384	0.0889
2-5	0.00831973	9.63e-07	0.0489337	1.57e-06	8.10206	0.0762		-22.6866	-5.33929	0.0520454
2-5	0.00831917	8.65e-07	0.0489271	1.47e-06	8.12767	0.0811		-22.8188	-5.47386	0.0508135
2-5	0.00831886	9.47e-07	0.0489286	1.56e-06	8.03616	0.0749		-22.7891	-5.44357	0.0519217
nbs123	0.0084163	9.32e-07	0.0500675	1.5e-06	8.54021	0.0859
2-5	0.00832064	8.62e-07	0.0489325	1.6e-06	8.09727	0.0765		-22.782	-5.43641	0.0558489
2-5	0.00831906	1e-06	0.0489328	1.45e-06	8.06633	0.0836		-22.7742	-5.42849	0.0541111
2-5	0.00831917	9.43e-07	0.0489336	1.54e-06	8.13503	0.082		-22.7597	-5.41365	0.0551396
nbs123	0.0084176	9.43e-07	0.050079	1.7e-06	8.64708	0.0727
2-5	0.00831999	9.65e-07	0.0489338	1.7e-06	8.20914	0.0792		-22.8303	-5.48553	0.0585823
2-5	0.00832346	9.6e-07	0.0489318	1.51e-06	8.15976	0.0835		-22.8712	-5.52719	0.0563672
2-5	0.00832166	9.35e-07	0.0489299	1.79e-06	8.14356	0.0816		-22.9082	-5.56479	0.0596932
nbs123	0.00841749	1.03e-06	0.0500752	1.64e-06	8.34457	0.126
2-5	0.00831954	7.85e-07	0.0489347	1.96e-06	8.11826	0.0785		-22.7633	-5.41738	0.0597848
2-5	0.00831958	9.72e-07	0.04893	1.81e-06	8.14968	0.0811		-22.8588	-5.51454	0.0577783
2-5	0.00831969	8.86e-07	0.0489352	2.07e-06	8.10947	0.08		-22.7541	-5.40803	0.0613132
nbs123	0.00842027	9.98e-07	0.050074	1.5e-06	8.4954	0.0865
2-5	0.00832136	8.03e-07	0.0489376	1.93e-06	8.16528	0.0847		-22.742	-5.39568	0.0572671
2-5	0.00832055	8.23e-07	0.0489344	1.89e-06	8.02585	0.0793		-22.8071	-5.46194	0.056709
2-5	0.00832183	8.94e-07	0.0489368	1.54e-06	8.14513	0.0825		-22.7584	-5.41235	0.0521006
nbs123	0.00841839	8.13e-07	0.050079	1.44e-06	8.39669	0.0792
2-6	0.0083209	9.62e-07	0.0489376	1.52e-06	8.09438	0.0827		-22.7682	-5.42234	0.0541341
2-6	0.00832045	9.57e-07	0.0489334	1.99e-06	8.01829	0.0825		-22.8521	-5.5077	0.0601634
2-6	0.00832082	9.4e-07	0.0489324	1.63e-06	7.95358	0.0836		-22.8708	-5.5268	0.0554565
nbs123	0.00842039	8.47e-07	0.0500765	1.69e-06	8.16281	0.0965
2-6	0.00832206	9.36e-07	0.0489301	1.7e-06	7.93844	0.0816		-22.8755	-5.53157	0.0572681
2-6	0.00832434	9.35e-07	0.048937	1.55e-06	7.99367	0.0829		-22.7373	-5.39093	0.0554592
2-6	0.0083196	9.64e-07	0.0489339	1.79e-06	7.98938	0.068		-22.7996	-5.45434	0.0584005
nbs123	0.00841937	9.11e-07	0.0500747	1.53e-06	8.37789	0.0791
2-6	0.00831923	8.67e-07	0.0489295	1.54e-06	7.93445	0.0812		-22.8787	-5.53479	0.0563342
2-6	0.00831768	8.8e-07	0.048935	1.81e-06	7.9282	0.0783		-22.7703	-5.42443	0.0595906
2-6	0.00831933	9.63e-07	0.0489362	1.62e-06	7.95472	0.0743		-22.7451	-5.39882	0.0572611
nbs123	0.0084173	8.12e-07	0.0500757	1.77e-06	8.57021	0.08
2-6	0.00831839	9.89e-07	0.0489366	1.75e-06	7.81579	0.084		-22.7323	-5.38584	0.062277
2-6	0.00831885	9.7e-07	0.0489364	1.65e-06	7.81269	0.0842		-22.7359	-5.3895	0.0611266
2-6	0.00832113	1.01e-06	0.0489354	1.76e-06	7.87444	0.0788		-22.7573	-5.41124	0.0623951
nbs123	0.00842075	7.51e-07	0.0500741	1.84e-06	8.38866	0.0705
2-6	0.00831896	8.81e-07	0.048934	2e-06	7.96568	0.0769		-22.8252	-5.4803	0.0644942
2-6	0.00832124	9.76e-07	0.0489367	1.73e-06	8.03877	0.0836		-22.7716	-5.42583	0.0611456
2-6	0.00831966	9.29e-07	0.0489348	1.54e-06	8.02537	0.0845		-22.8094	-5.46424	0.0589866
nbs123	0.00841898	8.17e-07	0.0500799	1.69e-06	8.38026	0.0695
2-6	0.00831887	8.74e-07	0.0489337	1.65e-06	7.83374	0.0812		-22.7796	-5.43394	0.0769019
2-6	0.00831872	8.8e-07	0.0489337	1.72e-06	7.90677	0.0826		-22.7794	-5.43374	0.0775398
2-6	0.00831885	9.67e-07	0.0489361	1.76e-06	7.78413	0.0812		-22.7327	-5.38618	0.0779129
nbs123	0.00841583	1.55e-06	0.0500689	3.02e-06	8.5416	0.194
2-7	0.00832208	8.79e-07	0.0489371	1.66e-06	7.88698	0.0779		-22.7621	-5.41611	0.0765569
2-7	0.00832066	8.3e-07	0.0489354	1.68e-06	7.96052	0.0806		-22.7952	-5.44984	0.0767394
2-7	0.00831966	9.65e-07	0.0489392	1.57e-06	7.89272	0.0852		-22.7185	-5.3718	0.0757594
nbs123	0.00841824	8.79e-07	0.0500849	1.64e-06	8.0755	0.0971
2-7	0.00831765	9.2e-07	0.0489368	1.84e-06	7.84593	0.0841		-22.8438	-5.49923	0.0606581
2-7	0.00832055	8.42e-07	0.0489387	1.52e-06	7.78344	0.0832		-22.8072	-5.46204	0.0568363
2-7	0.00832031	9.04e-07	0.0489372	1.67e-06	7.74115	0.0798		-22.8364	-5.49171	0.0585681
nbs123	0.00841876	1.06e-06	0.0500768	1.73e-06	8.32186	0.0893
2-7	0.00831957	8.92e-07	0.0489326	1.53e-06	7.77605	0.0778		-22.8744	-5.53039	0.057183
2-7	0.00832027	9.22e-07	0.0489345	1.59e-06	7.82607	0.0781		-22.836	-5.49137	0.0578619
2-7	0.00832078	8.32e-07	0.0489381	1.63e-06	7.8128	0.0769		-22.7641	-5.4182	0.0583234
nbs123	0.00841797	8.48e-07	0.0500794	1.66e-06	8.40922	0.0803
2-7	0.00832008	1.01e-06	0.0489372	1.56e-06	7.88253	0.0751		-22.8065	-5.46131	0.0556576
2-7	0.00831802	1.07e-06	0.0489336	1.64e-06	7.85677	0.0736		-22.8798	-5.53589	0.0566112
2-7	0.00831782	9.89e-07	0.048939	1.83e-06	7.88812	0.0763		-22.771	-5.42514	0.0589903
nbs123	0.00841883	8.34e-07	0.0500793	1.57e-06	8.3724	0.0798
2-7	0.00832026	9.26e-07	0.0489309	1.45e-06	7.8621	0.0717		-22.8733	-5.52929	0.0569279
2-7	0.00831895	9.71e-07	0.0489397	1.54e-06	7.92929	0.0778		-22.6978	-5.35064	0.0579036
2-7	0.00831972	9.54e-07	0.0489428	1.6e-06	7.97436	0.0761		-22.6351	-5.28683	0.0585777
nbs123	0.00841839	8.63e-07	0.0500733	1.86e-06	8.34531	0.0853
2-7	0.00832094	9.02e-07	0.0489378	1.75e-06	7.81961	0.0848		-22.6798	-5.33234	0.0596314
2-7	0.00832019	1.01e-06	0.0489366	1.42e-06	7.8691	0.0807		-22.7043	-5.35734	0.0558493
2-7	0.00831801	8.37e-07	0.0489407	1.52e-06	7.84043	0.082		-22.6227	-5.27421	0.0569363
nbs123	0.0084206	9.07e-07	0.0500737	1.5e-06	8.2983	0.0845
3-4	0.00832145	6.79e-07	0.048937	1.44e-06	10.6954	0.132		-22.7451	-5.39887	0.0513483
3-4	0.00832175	6.77e-07	0.0489426	1.64e-06	10.7645	0.141		-22.6323	-5.28404	0.0537922
3-4	0.00832188	7.62e-07	0.0489442	1.39e-06	10.6463	0.133		-22.6006	-5.25172	0.0507673
nbs123	0.00842125	1.09e-06	0.0500783	1.48e-06	8.21842	0.088
3-4	0.00831969	8.23e-07	0.0489452	1.54e-06	10.5747	0.138		-22.6578	-5.30995	0.0531155
3-4	0.00832054	7.63e-07	0.0489458	1.49e-06	10.4603	0.136		-22.646	-5.29796	0.0525167
3-4	0.00831959	7.25e-07	0.0489457	1.48e-06	10.477	0.129		-22.6486	-5.30061	0.0523985
nbs123	0.00842001	8.92e-07	0.0500816	1.55e-06	8.11931	0.0802
3-4	0.0083196	7.51e-07	0.048938	1.34e-06	10.2485	0.125		-22.8713	-5.52726	0.0524767
3-4	0.00832085	8.67e-07	0.0489369	1.49e-06	10.1562	0.125		-22.8949	-5.55124	0.0541396
3-4	0.0083224	8.28e-07	0.0489389	1.44e-06	10.1276	0.121		-22.8541	-5.50978	0.053571
nbs123	0.0084228	9.34e-07	0.0500855	1.62e-06	8.15724	0.0778
3-4	0.00832237	7.15e-07	0.0489417	1.52e-06	10.4855	0.132		-22.7249	-5.37823	0.0569747
3-4	0.00831929	7.23e-07	0.0489358	1.45e-06	10.0805	0.131		-22.8417	-5.49711	0.0562097
3-4	0.00831922	9.05e-07	0.048942	1.41e-06	10.2444	0.13		-22.7183	-5.37152	0.0557813
nbs123	0.00841783	8.26e-07	0.050074	1.76e-06	8.03864	0.0784
3-4	0.00832228	7.42e-07	0.0489415	1.23e-06	10.3195	0.122		-22.677	-5.32956	0.0548251
3-4	0.00832216	7.94e-07	0.0489423	1.45e-06	10.4066	0.131		-22.6611	-5.3133	0.0570255
3-4	0.00832365	6.87e-07	0.0489408	1.46e-06	10.416	0.13		-22.6898	-5.34257	0.0571324
nbs123	0.00842201	9.38e-07	0.0500801	1.69e-06	8.14562	0.0814
3-4	0.0083219	6.97e-07	0.0489407	1.68e-06	10.511	0.14		-22.7572	-5.41113	0.0579959
3-4	0.00832254	6.68e-07	0.0489399	1.35e-06	10.4601	0.137		-22.775	-5.42922	0.0542779
3-4	0.00832037	6.14e-07	0.0489422	1.51e-06	10.3885	0.127		-22.7276	-5.38105	0.0560094
nbs123	0.0084189	1.1e-06	0.0500808	1.62e-06	8.04274	0.0835
3-4	0.00832082	7.66e-07	0.04894	1.46e-06	10.2902	0.131		-22.76	-5.41398	0.0549721
3-4	0.0083233	7.5e-07	0.0489384	1.55e-06	10.4283	0.129		-22.7909	-5.44548	0.055992
3-4	0.00832122	7.87e-07	0.0489449	1.37e-06	10.4951	0.126		-22.6617	-5.31399	0.0539947
nbs123	0.00842011	1.01e-06	0.0500788	1.65e-06	8.18555	0.0814
3-4	0.00832243	7.76e-07	0.0489441	1.45e-06	10.5027	0.14		-22.7371	-5.39072	0.0578126
3-4	0.00832096	6.31e-07	0.0489441	1.6e-06	10.443	0.128		-22.7369	-5.39051	0.0594414
3-4	0.00832026	7.03e-07	0.0489436	1.4e-06	10.3209	0.129		-22.7467	-5.40047	0.057296
nbs123	0.00841975	9.75e-07	0.0500869	1.86e-06	8.13371	0.0806
3-5	0.00832023	7.92e-07	0.0489376	1.35e-06	10.2973	0.139		-22.9101	-5.56677	0.0545733
3-5	0.00831889	8.09e-07	0.0489399	1.31e-06	10.2873	0.134		-22.865	-5.52085	0.0541641
3-5	0.00832184	7.19e-07	0.0489343	1.3e-06	10.3374	0.134		-22.9772	-5.63505	0.0540649
nbs123	0.00841828	9.13e-07	0.0500833	1.45e-06	7.94081	0.0775
3-5	0.00831895	8.02e-07	0.0489392	1.55e-06	10.0769	0.124		-22.8417	-5.49712	0.0530238
3-5	0.00831874	7.57e-07	0.0489374	1.54e-06	10.1721	0.137		-22.878	-5.5341	0.0529027
3-5	0.00831831	7.84e-07	0.048933	1.28e-06	9.98485	0.12		-22.9657	-5.62331	0.0499266
nbs123	0.00842057	1.02e-06	0.0500832	1.56e-06	7.88009	0.0795
3-5	0.00832262	6.56e-07	0.0489372	1.47e-06	10.214	0.136		-22.7581	-5.41208	0.0552499
3-5	0.0083196	8.77e-07	0.0489395	1.56e-06	10.2486	0.124		-22.712	-5.36513	0.0562701
3-5	0.00832111	7.51e-07	0.0489387	1.26e-06	10.326	0.135		-22.7274	-5.38078	0.0530389
nbs123	0.00841744	9.58e-07	0.0500705	1.72e-06	7.84155	0.0754
3-5	0.00831702	7.48e-07	0.0489407	1.44e-06	10.1413	0.127		-22.6878	-5.34046	0.0566703
3-5	0.008319	7.83e-07	0.0489377	1.4e-06	9.84139	0.118		-22.7473	-5.40103	0.0562512
3-5	0.00831954	7.84e-07	0.0489401	1.25e-06	10.1465	0.128		-22.6987	-5.35164	0.0547554
nbs123	0.00841899	8.65e-07	0.0500831	1.71e-06	8.03915	0.0763
3-5	0.00832014	7.31e-07	0.0489348	1.35e-06	10.0483	0.13		-22.8692	-5.52518	0.0553694
3-5	0.00832099	8.57e-07	0.0489379	1.34e-06	10.1273	0.137		-22.8075	-5.46238	0.055267
3-5	0.0083205	6.79e-07	0.0489377	1.42e-06	10.1627	0.14		-22.8113	-5.46624	0.0560949
nbs123	0.00841921	8.96e-07	0.0500772	1.69e-06	8.06686	0.0832
3-5	0.00831864	7.6e-07	0.0489365	1.45e-06	10.168	0.128		-22.8061	-5.46088	0.0547694
3-5	0.00832044	9.41e-07	0.0489381	1.4e-06	10.1989	0.132		-22.7727	-5.42694	0.054223
3-5	0.00832158	8.68e-07	0.048941	1.42e-06	10.1331	0.129		-22.7144	-5.36759	0.0544388
nbs123	0.00841862	8.51e-07	0.0500799	1.57e-06	7.96174	0.0845
3-5	0.00831982	6.87e-07	0.0489359	1.48e-06	10.1332	0.118		-22.878	-5.53412	0.0586915
3-5	0.0083175	7.36e-07	0.0489377	1.4e-06	9.83915	0.117		-22.8421	-5.49754	0.0578655
3-5	0.00831867	8.28e-07	0.0489433	1.5e-06	10.1324	0.121		-22.7309	-5.38435	0.0589007
nbs123	0.00841713	9.78e-07	0.0500834	1.97e-06	7.95166	0.0791
3-5	0.00831857	8.42e-07	0.0489415	1.42e-06	10.1156	0.127		-22.7514	-5.40522	0.0587235
3-5	0.00831877	7.66e-07	0.0489419	1.5e-06	9.9858	0.121		-22.7424	-5.39608	0.059548
3-5	0.00832071	7.88e-07	0.0489405	1.48e-06	10.176	0.129		-22.7716	-5.42575	0.0593392
nbs123	0.00841985	1.02e-06	0.0500784	1.63e-06	7.9556	0.0745
3-5	0.00831957	7.13e-07	0.048943	1.31e-06	10.159	0.134		-22.7497	-5.40354	0.0527599
3-5	0.00831909	7.63e-07	0.0489432	1.35e-06	10.2197	0.129		-22.7449	-5.39867	0.0531791
3-5	0.00831759	7.63e-07	0.0489423	1.63e-06	10.1542	0.125		-22.7629	-5.41696	0.0563594
nbs123	0.00841844	7.96e-07	0.0500862	1.59e-06	7.92275	0.0728
3-6	0.00831811	8.32e-07	0.0489405	1.55e-06	9.92049	0.124		-22.8502	-5.50576	0.0539242
3-6	0.00831939	7.86e-07	0.0489491	1.23e-06	10.0925	0.129		-22.6793	-5.33182	0.0503605
3-6	0.00832062	8.54e-07	0.0489418	1.37e-06	10.1141	0.121		-22.825	-5.48016	0.0518491
nbs123	0.00841887	9.42e-07	0.0500837	1.5e-06	8.1014	0.0779
3-6	0.00832089	7.28e-07	0.048945	1.52e-06	10.0581	0.125		-22.7658	-5.41989	0.0585163
3-6	0.00831728	8.76e-07	0.0489447	1.57e-06	10.0775	0.121		-22.7724	-5.4266	0.0590649
3-6	0.00831884	7.77e-07	0.0489429	1.26e-06	9.97936	0.124		-22.8077	-5.46256	0.0558793
nbs123	0.00841716	9.35e-07	0.0500868	1.98e-06	7.52607	0.0749
3-6	0.00831762	8.03e-07	0.0489438	1.56e-06	10.0558	0.118		-22.7645	-5.41855	0.059057
3-6	0.00831937	8.14e-07	0.048945	1.48e-06	10.0163	0.118		-22.7411	-5.39477	0.0581907
3-6	0.00832185	8.27e-07	0.0489423	1.59e-06	10.0425	0.115		-22.795	-5.44964	0.0593906
nbs123	0.00842037	8.59e-07	0.0500811	1.51e-06	8.10857	0.0742
3-6	0.00832001	8.66e-07	0.0489454	1.75e-06	10.1276	0.135		-22.687	-5.33966	0.0572091
3-6	0.00832008	8.91e-07	0.0489412	1.5e-06	10.2043	0.138		-22.7706	-5.42481	0.0541653
3-6	0.0083199	7.16e-07	0.0489463	1.49e-06	10.0452	0.121		-22.6694	-5.32178	0.0540482
nbs123	0.00842055	8.24e-07	0.0500821	1.65e-06	8.02393	0.0797
3-6	0.00832172	8.39e-07	0.048946	1.52e-06	10.1482	0.127		-22.6955	-5.34835	0.0556426
3-6	0.00832069	8.08e-07	0.0489449	1.41e-06	10.1986	0.129		-22.7163	-5.36949	0.0544206
3-6	0.00832059	8.2e-07	0.0489458	1.42e-06	10.1233	0.132		-22.6995	-5.35242	0.0545288
nbs123	0.00841855	1e-06	0.0500831	1.62e-06	7.9654	0.0764
3-6	0.0083191	7.59e-07	0.0489442	1.46e-06	10.1828	0.126		-22.7246	-5.37795	0.0559407
3-6	0.00831922	7.54e-07	0.0489471	1.65e-06	10.2443	0.127		-22.6677	-5.32003	0.0581025
3-6	0.00832167	8.52e-07	0.0489427	1.27e-06	10.0177	0.116		-22.7541	-5.40802	0.0539711
nbs123	0.00842031	1.07e-06	0.0500815	1.73e-06	7.98928	0.0775
3-6	0.00832226	8.18e-07	0.048945	1.41e-06	10.0756	0.127		-22.6552	-5.30737	0.0563522
3-6	0.00832308	7.49e-07	0.0489475	1.43e-06	10.2487	0.126		-22.6063	-5.25758	0.0565615
3-6	0.00832135	8.26e-07	0.0489473	1.74e-06	10.2203	0.141		-22.6093	-5.26063	0.0600781
nbs123	0.008419	9.59e-07	0.0500776	1.7e-06	8.01711	0.0867
3-6	0.00832121	7.8e-07	0.048947	1.52e-06	10.209	0.126		-22.6609	-5.31313	0.0561253
3-6	0.00832115	7.79e-07	0.048945	1.49e-06	10.064	0.117		-22.7006	-5.35357	0.0557892
3-6	0.00832073	8.53e-07	0.0489458	1.55e-06	10.2737	0.137		-22.6845	-5.33711	0.0564672
nbs123	0.00842103	8.68e-07	0.0500861	1.61e-06	7.9843	0.0785
3-6	0.00832174	7.27e-07	0.0489457	1.57e-06	10.0693	0.124		-22.7281	-5.38153	0.056339
3-6	0.00832096	7.46e-07	0.0489464	1.55e-06	9.97419	0.12		-22.7147	-5.36791	0.0561071
3-6	0.0083212	7.65e-07	0.0489456	1.42e-06	10.1769	0.125		-22.7307	-5.38417	0.0546523
nbs123	0.00842138	1.08e-06	0.050082	1.67e-06	7.89508	0.0764
3-7	0.00832014	7.82e-07	0.0489413	1.55e-06	10.2742	0.13		-22.7273	-5.38067	0.0564577
3-7	0.00832087	8.11e-07	0.0489439	1.43e-06	10.0837	0.138		-22.6751	-5.32763	0.0551188
3-7	0.00831794	7.71e-07	0.048943	1.39e-06	10.2039	0.137		-22.6937	-5.34653	0.0546903
nbs123	0.00841956	7.98e-07	0.050077	1.64e-06	7.88275	0.0769
3-7	0.00832285	7.3e-07	0.0489417	1.56e-06	10.3503	0.13		-22.7061	-5.35917	0.0591418
3-7	0.0083211	7.53e-07	0.0489437	1.35e-06	10.3654	0.129		-22.6646	-5.3169	0.0569435
3-7	0.00832096	7.8e-07	0.0489446	1.57e-06	10.3118	0.122		-22.6468	-5.29881	0.0592511
nbs123	0.00841986	9.76e-07	0.0500805	1.88e-06	8.11971	0.082
3-7	0.0083175	7.16e-07	0.0489413	1.57e-06	10.5554	0.137		-22.7362	-5.38973	0.0577533
3-7	0.00832074	7.41e-07	0.0489432	1.36e-06	10.2925	0.131		-22.6974	-5.3503	0.0554843
3-7	0.00832126	7.51e-07	0.0489401	1.49e-06	10.3785	0.14		-22.7607	-5.41472	0.0568621
nbs123	0.0084206	1.01e-06	0.0500794	1.5e-06	8.02157	0.0717
3-7	0.00832103	7.82e-07	0.0489394	1.63e-06	10.2669	0.137		-22.8076	-5.46247	0.0571803
3-7	0.00832047	7.22e-07	0.048943	1.55e-06	10.4148	0.141		-22.7362	-5.38972	0.0562425
3-7	0.00832021	6.92e-07	0.048942	1.33e-06	10.3797	0.132		-22.7561	-5.41004	0.05384
nbs123	0.00841875	9.67e-07	0.050084	1.78e-06	8.04456	0.0793
3-7	0.0083176	8.29e-07	0.0489388	1.42e-06	10.3946	0.136		-22.7707	-5.42492	0.0573138
3-7	0.00831847	7.65e-07	0.0489423	1.23e-06	10.3414	0.129		-22.7014	-5.3544	0.0554487
3-7	0.00831854	8.36e-07	0.0489426	1.57e-06	10.2082	0.131		-22.6953	-5.3481	0.0589235
nbs123	0.00841855	8.93e-07	0.0500744	1.72e-06	8.24065	0.0779
3-7	0.00831942	7.63e-07	0.0489386	1.45e-06	10.3384	0.129		-22.786	-5.44041	0.0562983
3-7	0.00831788	7.34e-07	0.0489461	1.31e-06	10.3413	0.131		-22.636	-5.28779	0.0548447
3-7	0.00831916	7.8e-07	0.0489439	1.34e-06	10.419	0.141		-22.6813	-5.33392	0.055147
nbs123	0.00841642	9.27e-07	0.0500851	1.67e-06	8.02921	0.0826
3-7	0.00831763	7.98e-07	0.0489411	1.43e-06	10.2469	0.125		-22.8529	-5.50859	0.0537261
3-7	0.00831765	7.45e-07	0.0489419	1.52e-06	10.349	0.124		-22.8368	-5.49213	0.0547477
3-7	0.00831874	7.83e-07	0.0489416	1.34e-06	10.3547	0.139		-22.8422	-5.49761	0.0527484
nbs123	0.00841746	9.99e-07	0.0500862	1.52e-06	8.20773	0.0786
3-7	0.00831867	7.59e-07	0.0489451	1.34e-06	10.1631	0.13		-22.7601	-5.41407	0.0539018
3-7	0.00831866	7.99e-07	0.0489448	1.52e-06	10.1201	0.127		-22.7657	-5.41976	0.0558597
3-7	0.00832075	7.47e-07	0.0489431	1.5e-06	10.3179	0.132		-22.801	-5.45573	0.0556342
nbs123	0.00841954	8.25e-07	0.0500839	1.76e-06	8.17912	0.0779
4-4	0.00832306	7.55e-07	0.0489481	1.54e-06	10.1306	0.126		-22.6259	-5.27756	0.0567466
4-4	0.00832117	7.46e-07	0.0489438	1.51e-06	10.2681	0.129		-22.712	-5.36515	0.0564106
4-4	0.00831895	7.87e-07	0.0489433	1.52e-06	9.8985	0.131		-22.7216	-5.3749	0.0565227
nbs123	0.00841732	8.59e-07	0.0500785	1.58e-06	7.87928	0.0799
4-4	0.00831873	8.48e-07	0.0489468	1.36e-06	10.2329	0.134		-22.6034	-5.25459	0.0529247
4-4	0.00831968	7.84e-07	0.0489462	1.62e-06	10.1756	0.132		-22.6172	-5.26861	0.0558968
4-4	0.00832018	7.45e-07	0.0489474	1.55e-06	10.0325	0.136		-22.5914	-5.2424	0.0550616
nbs123	0.00841802	8.94e-07	0.0500791	1.61e-06	8.06393	0.0855
4-4	0.00832003	8.13e-07	0.0489445	1.33e-06	9.9973	0.125		-22.7157	-5.36889	0.0524841
4-4	0.00831981	8.65e-07	0.0489452	1.49e-06	10.017	0.132		-22.7013	-5.35425	0.0542485
4-4	0.00831849	9.06e-07	0.0489508	1.43e-06	10.1415	0.131		-22.5901	-5.24106	0.0535684
nbs123	0.00841778	9.7e-07	0.0500852	1.57e-06	7.93218	0.0792
4-4	0.00831607	8.09e-07	0.048945	1.44e-06	9.94513	0.123		-22.764	-5.4181	0.0552732
4-4	0.00831837	7.25e-07	0.0489507	1.55e-06	9.90601	0.126		-22.6502	-5.30228	0.0564994
4-4	0.0083185	7.16e-07	0.0489446	1.56e-06	10.0079	0.142		-22.7718	-5.42603	0.0566164
nbs123	0.00841775	9.26e-07	0.050085	1.74e-06	7.9266	0.0723
4-4	0.00832127	8.13e-07	0.0489433	1.69e-06	10.1847	0.131		-22.78	-5.43438	0.0599367
4-4	0.00832143	6.93e-07	0.0489424	1.67e-06	10.1299	0.124		-22.7978	-5.45246	0.0597026
4-4	0.00831812	8.32e-07	0.0489458	1.5e-06	10.1194	0.136		-22.7295	-5.38297	0.0577866
nbs123	0.00841655	1.01e-06	0.0500834	1.73e-06	7.86728	0.0718
4-4	0.00831769	6.89e-07	0.0489401	1.55e-06	10.1574	0.137		-22.7483	-5.40209	0.0564961
4-4	0.0083197	8.51e-07	0.0489458	1.64e-06	10.2029	0.134		-22.6349	-5.28665	0.0575449
4-4	0.00831858	8.09e-07	0.0489453	1.62e-06	10.2101	0.139		-22.6447	-5.29661	0.0573082
nbs123	0.00841887	9.46e-07	0.0500753	1.58e-06	7.93791	0.0798
4-4	0.00832218	8.42e-07	0.0489467	1.39e-06	10.2786	0.134		-22.6312	-5.28295	0.0548539
4-4	0.00831827	8.27e-07	0.0489446	1.54e-06	10.1745	0.134		-22.674	-5.32644	0.0565021
4-4	0.00832108	7.65e-07	0.0489494	1.38e-06	10.382	0.139		-22.5787	-5.2295	0.0547477
nbs123	0.00841732	9.96e-07	0.0500849	1.74e-06	7.93533	0.0795
4-4	0.00831861	7.22e-07	0.0489473	1.58e-06	10.2727	0.13		-22.7341	-5.38765	0.0586678
4-4	0.00831873	7.55e-07	0.0489507	1.4e-06	10.1158	0.137		-22.6656	-5.31795	0.0567267
4-4	0.00831918	7.3e-07	0.0489518	1.48e-06	10.378	0.134		-22.6443	-5.29621	0.0575676
nbs123	0.00841793	1.01e-06	0.050087	1.73e-06	7.87135	0.0741
4-5	0.0083176	7.6e-07	0.0489453	1.56e-06	10.138	0.132		-22.7017	-5.35463	0.0568303
4-5	0.00831663	8.19e-07	0.0489453	1.34e-06	10.0804	0.135		-22.7001	-5.353	0.0544368
4-5	0.00831733	7.59e-07	0.0489458	1.24e-06	10.1267	0.133		-22.6905	-5.34325	0.0534384
nbs123	0.00841793	9.4e-07	0.0500774	1.6e-06	7.86505	0.0732
4-5	0.00832092	8.68e-07	0.0489441	1.59e-06	10.1916	0.135		-22.6408	-5.29271	0.0562297
4-5	0.00832056	7.98e-07	0.0489448	1.43e-06	10.1571	0.136		-22.6257	-5.27726	0.0544062
4-5	0.00831895	7.84e-07	0.0489395	1.5e-06	10.0172	0.128		-22.7331	-5.3866	0.0551893
nbs123	0.00841779	8.59e-07	0.0500783	1.65e-06	7.93103	0.0792
4-5	0.00831578	7.23e-07	0.048944	1.48e-06	10.0386	0.125		-22.6463	-5.2983	0.0587765
4-5	0.00831927	7.05e-07	0.0489428	1.53e-06	10.0511	0.127		-22.6711	-5.3235	0.0593089
4-5	0.008316	8.45e-07	0.0489458	1.78e-06	9.81592	0.131		-22.6116	-5.26293	0.0621518
nbs123	0.00841584	9.6e-07	0.0500779	1.91e-06	7.95137	0.0822
4-5	0.00831833	7.92e-07	0.0489417	1.47e-06	10.0156	0.139		-22.7718	-5.426	0.0595809
4-5	0.00831657	7.55e-07	0.0489436	1.52e-06	10.2972	0.135		-22.7335	-5.38699	0.0601018
4-5	0.00831916	8.67e-07	0.0489408	1.57e-06	10.1641	0.14		-22.7882	-5.44267	0.0606369
nbs123	0.00841835	1.03e-06	0.0500864	1.73e-06	7.87401	0.086
4-5	0.00831698	7.38e-07	0.0489431	1.68e-06	9.87365	0.12		-22.8335	-5.48877	0.0598173
4-5	0.00831556	7.71e-07	0.048948	1.8e-06	9.6812	0.114		-22.7356	-5.3892	0.061255
4-5	0.00831747	7.73e-07	0.0489455	1.71e-06	9.63871	0.108		-22.7852	-5.4396	0.0601701
nbs123	0.00841703	1.1e-06	0.0500872	1.74e-06	8.13706	0.0825
4-5	0.00831788	7.16e-07	0.048947	1.72e-06	10.0544	0.117		-22.6856	-5.33825	0.0604059
4-5	0.00831926	8.43e-07	0.0489422	1.82e-06	9.86805	0.126		-22.7816	-5.43599	0.061619
4-5	0.00831606	6.84e-07	0.0489458	1.59e-06	9.7654	0.109		-22.7093	-5.36243	0.0589009
nbs123	0.00841361	9.38e-07	0.0500791	1.74e-06	7.91648	0.0779
4-5	0.00831812	8.98e-07	0.0489476	1.45e-06	9.99971	0.122		-22.7619	-5.41589	0.055721
4-5	0.0083178	8.27e-07	0.0489442	1.55e-06	9.96936	0.123		-22.8308	-5.486	0.0568348
4-5	0.00831655	6.91e-07	0.0489425	1.54e-06	9.86941	0.128		-22.8649	-5.52074	0.0567218
nbs123	0.00841803	9.86e-07	0.0500963	1.6e-06	7.72996	0.0871
4-5	0.00831657	7.26e-07	0.0489478	1.21e-06	10.2726	0.134		-22.8632	-5.51905	0.052626
4-5	0.00831788	8.53e-07	0.0489436	1.59e-06	10.1102	0.137		-22.9477	-5.60499	0.0566902
4-5	0.00831602	7.61e-07	0.0489452	1.4e-06	10.1037	0.132		-22.9151	-5.57188	0.0545579
nbs123	0.00841504	1.01e-06	0.0500899	1.69e-06	7.89331	0.0771
4-6	0.00831614	7.87e-07	0.0489446	1.53e-06	10.0948	0.124		-22.9087	-5.5653	0.0581215
4-6	0.0083137	8.86e-07	0.0489443	1.7e-06	10.1513	0.124		-22.9157	-5.57241	0.0600611
4-6	0.00831858	7.32e-07	0.0489472	1.37e-06	10.1179	0.124		-22.8582	-5.51389	0.0564299
nbs123	0.00841876	9.06e-07	0.0500945	1.78e-06	8.06989	0.0437
4-6	0.0083203	8.22e-07	0.0489446	1.29e-06	10.407	0.131		-22.8209	-5.47596	0.0522263
4-6	0.00831692	7.43e-07	0.0489456	1.45e-06	10.4057	0.136		-22.8013	-5.45605	0.0539496
4-6	0.00831629	7.72e-07	0.0489463	1.43e-06	10.0829	0.129		-22.7868	-5.44122	0.053726
nbs123	0.00841656	1e-06	0.0500809	1.39e-06	8.00985	0.0804
4-6	0.00831862	7.62e-07	0.0489466	1.51e-06	10.071	0.105		-22.7821	-5.43653	0.0548924
4-6	0.00831784	7.62e-07	0.0489477	1.49e-06	10.0363	0.123		-22.7596	-5.41356	0.0546634
4-6	0.00831754	6.75e-07	0.0489473	1.42e-06	10.0574	0.112		-22.7688	-5.42291	0.0538803
nbs123	0.00841646	9.32e-07	0.0500945	1.8e-06	7.9478	0.0778
4-6	0.00831741	9.07e-07	0.0489489	1.36e-06	10.2114	0.11		-22.8077	-5.46255	0.0553002
4-6	0.00831748	7.66e-07	0.0489435	1.67e-06	9.979	0.134		-22.9151	-5.57186	0.0587401
4-6	0.00831798	6.51e-07	0.0489481	1.58e-06	10.0995	0.139		-22.8249	-5.48002	0.0576897
nbs123	0.0084152	1.03e-06	0.0500882	1.58e-06	7.85981	0.0807
4-6	0.00831756	7.38e-07	0.0489458	1.41e-06	10.0905	0.125		-22.7632	-5.41724	0.0560843
4-6	0.00831638	7.82e-07	0.0489451	1.42e-06	10.1781	0.137		-22.7764	-5.43065	0.0561897
4-6	0.00831883	7.63e-07	0.0489417	1.51e-06	10.2699	0.138		-22.8445	-5.49994	0.057162
nbs123	0.0084182	8.4e-07	0.0500836	1.82e-06	7.83684	0.0711
4-6	0.00831768	7.45e-07	0.0489423	1.66e-06	10.2918	0.122		-22.7799	-5.43422	0.0606463
4-6	0.00832063	7.82e-07	0.0489441	1.4e-06	10.1694	0.129		-22.7449	-5.39866	0.0578426
4-6	0.00831626	7.82e-07	0.0489474	1.6e-06	10.2482	0.137		-22.6796	-5.33221	0.0599674
nbs123	0.00841835	8.91e-07	0.0500829	1.74e-06	7.83717	0.0718
4-6	0.008319	7.88e-07	0.0489457	1.53e-06	10.0768	0.125		-22.7862	-5.44061	0.058953
4-6	0.00831824	7.72e-07	0.0489422	1.62e-06	10.146	0.13		-22.855	-5.51071	0.0599496
4-6	0.00831796	7.96e-07	0.0489473	1.65e-06	10.0247	0.113		-22.7546	-5.40851	0.0602882
nbs123	0.00841788	7.26e-07	0.0500911	1.8e-06	7.93753	0.0814
4-6	0.00831906	8.14e-07	0.0489431	1.88e-06	10.0558	0.127		-22.8921	-5.54842	0.0641578
4-6	0.00831779	7.32e-07	0.0489427	1.51e-06	9.95944	0.137		-22.9005	-5.55696	0.0599385
4-6	0.00831795	8.18e-07	0.0489447	1.46e-06	9.99728	0.13		-22.8613	-5.51713	0.0594185
nbs123	0.00841621	9.55e-07	0.0500885	1.84e-06	7.79073	0.0791
4-7	0.00831765	7.22e-07	0.0489421	1.25e-06	9.71856	0.121		-22.8337	-5.48895	0.0577659
4-7	0.00831788	7.37e-07	0.0489462	1.57e-06	10.0566	0.135		-22.7504	-5.40422	0.0609381
4-7	0.00831701	7.54e-07	0.0489458	1.56e-06	10.1137	0.14		-22.7602	-5.41417	0.060831
nbs123	0.00841809	8.64e-07	0.050083	1.83e-06	7.70704	0.08
4-7	0.00831766	7.65e-07	0.0489468	1.9e-06	9.97659	0.131		-22.7986	-5.45331	0.0630878
4-7	0.00831642	7.77e-07	0.0489479	1.57e-06	9.73188	0.13		-22.7767	-5.43096	0.0591782
4-7	0.00831839	6.88e-07	0.0489463	1.38e-06	9.83532	0.13		-22.809	-5.46388	0.0571679
nbs123	0.00841879	9.42e-07	0.0500945	1.69e-06	7.21743	0.0964
4-7	0.00832004	6.91e-07	0.0489459	1.63e-06	9.88081	0.137		-22.7264	-5.37977	0.0572796
4-7	0.00831672	8.07e-07	0.048935	1.59e-06	9.76415	0.129		-22.9438	-5.60106	0.0568125
4-7	0.00831999	8.32e-07	0.0489423	1.54e-06	9.65625	0.118		-22.7981	-5.45272	0.0562318
nbs123	0.00841487	1.06e-06	0.0500737	1.61e-06	7.62212	0.0634
4-7	0.00831839	8.04e-07	0.0489447	1.47e-06	9.83326	0.12		-22.5894	-5.2404	0.0565618
4-7	0.00831739	8.24e-07	0.0489466	1.62e-06	9.64775	0.118		-22.5501	-5.20036	0.0582463
4-7	0.00831757	8.84e-07	0.0489467	1.42e-06	9.88724	0.136		-22.5489	-5.19914	0.0560255
nbs123	0.00841457	9.21e-07	0.050078	1.78e-06	7.58916	0.0705
											-5.41842	0.171082
2022.09
nbs123	0.00843254	8.98e-07	0.0500467	1.81e-06	7.66981	0.0764
3-4	0.00833556	1.09e-06	0.0489132	1.68e-06	7.38428	0.0725		-22.6362	-5.28802	0.0592437
3-4	0.00833793	9.74e-07	0.048915	1.8e-06	7.50724	0.0754		-22.6019	-5.25305	0.0606982
3-4	0.00833629	8.83e-07	0.0489154	1.53e-06	7.44974	0.0776		-22.5935	-5.24451	0.0575194
nbs123	0.00843312	1e-06	0.0500455	1.6e-06	7.85951	0.0746
3-4	0.00833567	8.66e-07	0.0489151	1.92e-06	7.48304	0.0757		-22.6291	-5.2808	0.0612994
3-4	0.00833796	9.02e-07	0.0489174	1.77e-06	7.65378	0.0702		-22.5838	-5.23464	0.0593815
3-4	0.00833934	9.15e-07	0.0489096	1.67e-06	7.70659	0.0767		-22.7394	-5.39305	0.0581616
nbs123	0.00843403	9.2e-07	0.0500498	1.73e-06	7.84404	0.0774
3-4	0.00833697	1.02e-06	0.0489125	1.67e-06	7.63562	0.0707		-22.6877	-5.34044	0.059054
3-4	0.00833541	9.9e-07	0.0489061	1.58e-06	7.63618	0.0787		-22.8154	-5.47038	0.058012
3-4	0.00833838	9.98e-07	0.0489047	1.69e-06	7.50166	0.0745		-22.843	-5.49845	0.0592945
nbs123	0.00843256	9.93e-07	0.0500462	1.68e-06	7.96456	0.0797
3-4	0.00833471	1.05e-06	0.048907	1.85e-06	7.45827	0.0724		-22.8014	-5.45617	0.0622901
3-4	0.00833315	9.76e-07	0.048905	1.9e-06	7.59909	0.0806		-22.8402	-5.49562	0.0629172
3-4	0.00833409	1.09e-06	0.0489059	1.98e-06	7.54244	0.0791		-22.8218	-5.47691	0.0639398
nbs123	0.0084346	1.04e-06	0.0500501	1.82e-06	7.77579	0.0739
3-4	0.0083337	7.82e-07	0.0489113	1.87e-06	7.56447	0.0759		-22.7547	-5.40858	0.0639675
3-4	0.00833584	1.05e-06	0.0489149	1.73e-06	7.55084	0.0766		-22.682	-5.33456	0.0622976
3-4	0.0083354	1.16e-06	0.0489029	1.7e-06	7.46497	0.0761		-22.9215	-5.57837	0.0619562
nbs123	0.00843478	1e-06	0.0500502	1.81e-06	7.91269	0.078
3-4	0.00833424	9.84e-07	0.0489115	1.69e-06	7.39248	0.0726		-22.7836	-5.43798	0.0611397
3-4	0.00833443	9.62e-07	0.0489046	1.5e-06	7.47398	0.0693		-22.9206	-5.57747	0.0590337
3-4	0.00833532	9.54e-07	0.0489079	1.73e-06	7.59085	0.0762		-22.8543	-5.50996	0.061607
nbs123	0.00843208	9.35e-07	0.0500535	1.76e-06	7.86716	0.0764
3-4	0.00833334	9.19e-07	0.0489096	1.89e-06	7.4532	0.0698		-22.7488	-5.40261	0.0634306
3-4	0.00833549	9.7e-07	0.0489104	1.75e-06	7.50453	0.0776		-22.731	-5.38452	0.0617282
3-4	0.00833339	9.56e-07	0.0489076	1.89e-06	7.48567	0.0752		-22.7874	-5.44186	0.0634316
nbs123	0.00843385	9.96e-07	0.0500426	1.8e-06	7.70409	0.0842
3-4	0.00833218	9.77e-07	0.0489109	1.85e-06	7.26545	0.0734		-22.8664	-5.52231	0.0616226
3-4	0.00833433	1.06e-06	0.0489069	1.85e-06	7.28995	0.0699		-22.9457	-5.60303	0.0616245
3-4	0.00833672	9.29e-07	0.0489223	1.91e-06	7.6938	0.0617		-22.6377	-5.2895	0.0623774
nbs123	0.00843488	8.43e-07	0.0500683	1.64e-06	8.23999	0.091
3-5	0.00833496	9.72e-07	0.0489243	1.67e-06	7.70511	0.0778		-22.842	-5.49742	0.0585832
3-5	0.00833418	1.03e-06	0.048925	1.93e-06	7.58673	0.0713		-22.827	-5.48218	0.0618304
3-5	0.00833543	8.96e-07	0.048925	1.89e-06	7.62809	0.0714		-22.8274	-5.48258	0.061312
nbs123	0.00843142	9.71e-07	0.0500675	1.73e-06	8.13899	0.0798
3-5	0.00833283	1.07e-06	0.0489233	1.68e-06	7.61747	0.0702		-22.85	-5.50562	0.0591529
3-5	0.00833525	1.02e-06	0.048928	1.68e-06	7.9829	0.0781		-22.7558	-5.40968	0.059151
3-5	0.00833708	9.22e-07	0.0489306	1.77e-06	8.10788	0.0785		-22.7034	-5.35642	0.0602362
nbs123	0.00843359	9.74e-07	0.0500671	1.68e-06	8.26119	0.086
3-5	0.00833561	1.15e-06	0.048929	1.91e-06	7.61209	0.0714		-22.7772	-5.43146	0.0592591
3-5	0.00833278	8.88e-07	0.0489285	1.68e-06	7.78237	0.0833		-22.7866	-5.44102	0.056274
3-5	0.00833465	9.88e-07	0.0489289	1.85e-06	7.52664	0.0685		-22.7782	-5.43248	0.0584586
nbs123	0.00843385	9.47e-07	0.0500717	1.47e-06	8.22344	0.0805
3-5	0.00833569	9.99e-07	0.0489313	1.59e-06	7.77956	0.0728		-22.818	-5.47301	0.0567824
3-5	0.0083332	9.46e-07	0.0489278	1.66e-06	7.70587	0.0781		-22.8875	-5.54374	0.0576145
3-5	0.00833819	9.67e-07	0.0489311	1.75e-06	7.76573	0.0806		-22.8222	-5.47727	0.058715
nbs123	0.00843589	8.97e-07	0.050076	1.81e-06	8.29849	0.0748
3-5	0.00833348	9.28e-07	0.048932	1.44e-06	7.78396	0.0868		-22.8592	-5.51497	0.0581361
3-5	0.00833344	9.09e-07	0.0489297	2.04e-06	7.92019	0.0853		-22.9057	-5.56232	0.0652075
3-5	0.00833093	9.75e-07	0.0489264	1.74e-06	7.83629	0.0788		-22.9716	-5.62939	0.0614698
nbs123	0.00843032	1.02e-06	0.0500775	1.74e-06	8.40577	0.0741
3-5	0.00833172	1.04e-06	0.0489272	1.94e-06	7.61942	0.0662		-22.8602	-5.51593	0.0620683
3-5	0.00833334	9e-07	0.0489278	1.78e-06	7.75091	0.0832		-22.8476	-5.50313	0.0600317
3-5	0.00833269	8.36e-07	0.0489261	1.78e-06	7.78315	0.0754		-22.8809	-5.53707	0.0600325
nbs123	0.00842853	9.33e-07	0.0500662	1.64e-06	7.98838	0.0776
3-5	0.00833256	1.04e-06	0.0489243	1.77e-06	7.43709	0.0755		-22.8159	-5.47089	0.0593402
3-5	0.00833394	1.05e-06	0.0489223	1.64e-06	7.35011	0.0743		-22.8567	-5.51236	0.0577594
3-5	0.00833467	1.13e-06	0.0489201	2e-06	7.53163	0.0788		-22.9002	-5.55667	0.0623202
nbs123	0.00843149	9.31e-07	0.050067	1.69e-06	7.79383	0.0866
3-5	0.00833158	1.05e-06	0.0489233	1.78e-06	7.38467	0.0793		-22.8851	-5.54129	0.0622325
3-5	0.00833521	9.57e-07	0.0489294	1.4e-06	7.58735	0.0742		-22.762	-5.41608	0.0580329
3-5	0.00833387	9.84e-07	0.04893	1.8e-06	7.50098	0.073		-22.7495	-5.40327	0.0624694
nbs123	0.00843226	9.39e-07	0.0500711	1.88e-06	8.03441	0.0838
3-6	0.00833342	8.9e-07	0.0489285	1.61e-06	7.65645	0.0718		-22.8008	-5.45552	0.0570276
3-6	0.00833426	9.45e-07	0.0489244	1.82e-06	7.4552	0.0811		-22.8839	-5.54008	0.0596093
3-6	0.00833353	9.31e-07	0.0489277	2.13e-06	7.53923	0.0769		-22.8166	-5.47158	0.063754
nbs123	0.00843309	9.15e-07	0.0500692	1.38e-06	8.18242	0.0869
3-6	0.00833631	9.18e-07	0.0489248	1.69e-06	7.56008	0.0793		-22.9149	-5.57166	0.0563399
3-6	0.00833459	1.16e-06	0.0489255	1.85e-06	7.57413	0.0856		-22.8999	-5.55641	0.0584018
3-6	0.00833145	9.56e-07	0.0489254	1.68e-06	7.68749	0.0728		-22.9025	-5.55905	0.0562146
nbs123	0.00843344	9.16e-07	0.0500752	1.75e-06	8.07826	0.0813
3-6	0.00833225	9.43e-07	0.0489334	1.72e-06	7.46673	0.0806		-22.7359	-5.38942	0.061349
3-6	0.00833043	9.43e-07	0.0489293	1.86e-06	7.50909	0.0773		-22.8161	-5.47113	0.0630337
3-6	0.00833293	1.06e-06	0.0489257	1.94e-06	7.48331	0.0755		-22.8888	-5.54512	0.0640349
nbs123	0.00843403	8.99e-07	0.0500684	1.81e-06	8.04244	0.0744
3-6	0.00833594	9.36e-07	0.0489316	1.8e-06	7.47143	0.0658		-22.738	-5.39163	0.0593461
3-6	0.00833428	9.89e-07	0.048936	1.82e-06	7.64146	0.0716		-22.6508	-5.3028	0.0595983
3-6	0.00833422	1.04e-06	0.0489251	1.81e-06	7.36067	0.0781		-22.868	-5.52395	0.0594761
nbs123	0.00843338	8.81e-07	0.0500718	1.47e-06	8.02352	0.0786
3-6	0.00833271	1.07e-06	0.0489318	1.92e-06	7.56168	0.0634		-22.823	-5.47812	0.0611305
3-6	0.00833234	9.47e-07	0.0489288	1.78e-06	7.35489	0.0847		-22.8831	-5.53929	0.059336
3-6	0.00833189	1.06e-06	0.0489363	1.5e-06	7.42711	0.0612		-22.7337	-5.38727	0.0560076
nbs123	0.00843283	7.71e-07	0.0500776	1.83e-06	7.84794	0.0816
nbs123	0.00843103	1.07e-06	0.0500864	1.84e-06	7.51192	0.0758
3-6	0.00833204	1.08e-06	0.0489518	1.85e-06	7.06982	0.0659		-22.7218	-5.37513	0.0639013
3-6	0.00833288	1.05e-06	0.0489459	2.15e-06	7.42143	0.0801		-22.8408	-5.49623	0.0677098
3-6	0.00833084	1.02e-06	0.0489493	1.7e-06	7.157	0.0762		-22.7717	-5.42592	0.0621392
nbs123	0.00842921	1.05e-06	0.0500936	1.81e-06	7.29986	0.0753
3-6	0.00833054	1.05e-06	0.0489528	1.98e-06	6.89874	0.0579		-22.806	-5.46084	0.0692859
3-6	0.00833233	9.45e-07	0.0489499	2.01e-06	7.376	0.0687		-22.8635	-5.51935	0.0696468
3-6	0.00833278	1.07e-06	0.0489501	1.63e-06	7.24155	0.0657		-22.8597	-5.51549	0.0653713
nbs123	0.0084293	9.87e-07	0.050097	2.16e-06	7.33865	0.0713
3-7	0.008329	1.15e-06	0.0489533	2.09e-06	7.24661	0.0811		-22.7735	-5.42774	0.0706218
3-7	0.00833112	9.48e-07	0.0489533	2.06e-06	7.24508	0.0772		-22.7743	-5.42856	0.070253
3-7	0.00832999	1.05e-06	0.04895	1.71e-06	7.40626	0.0764		-22.8408	-5.49621	0.0662197
nbs123	0.00843083	9.9e-07	0.0500913	1.81e-06	7.47634	0.0882
3-7	0.00833176	9.81e-07	0.0489484	2.09e-06	7.08109	0.0678		-22.7428	-5.39646	0.0615808
3-7	0.00832975	9.81e-07	0.0489375	2.23e-06	7.21627	0.0755		-22.9606	-5.61814	0.0636047
3-7	0.00833058	9.23e-07	0.0489375	1.7e-06	7.14496	0.0698		-22.9618	-5.61936	0.0563545
nbs123	0.00843028	9.25e-07	0.0500838	1.29e-06	7.56414	0.0751
3-7	0.00833077	1.06e-06	0.048939	1.89e-06	7.21065	0.0749		-22.7809	-5.43528	0.0590795
3-7	0.00833245	1.07e-06	0.0489352	2.21e-06	7.22588	0.0676		-22.857	-5.51271	0.0635492
3-7	0.00833051	1.13e-06	0.048936	1.87e-06	7.16603	0.073		-22.8398	-5.49523	0.0588147
nbs123	0.00843121	1.08e-06	0.0500758	1.83e-06	7.55391	0.0709
3-7	0.00833006	9.05e-07	0.0489284	1.78e-06	7.00567	0.0567		-22.9575	-5.61497	0.0698549
3-7	0.00833108	1e-06	0.0489332	1.93e-06	7.2177	0.0759		-22.8614	-5.51722	0.0714972
3-7	0.00832845	9.84e-07	0.0489326	2.17e-06	6.82223	0.0684		-22.8722	-5.52819	0.0743159
nbs123	0.00842781	1.22e-06	0.0500802	2.36e-06	7.23396	0.079
3-7	0.00832968	1.08e-06	0.0489329	2.16e-06	6.89352	0.0841		-22.8872	-5.54346	0.0729496
3-7	0.00833145	9.7e-07	0.0489454	2.01e-06	7.22218	0.0719		-22.6376	-5.28943	0.0711305
3-7	0.008331	1.03e-06	0.0489423	1.9e-06	7.00726	0.0733		-22.6997	-5.35263	0.0698585
nbs123	0.00842798	1.09e-06	0.0500779	1.7e-06	7.24521	0.0756
3-7	0.00833108	9.92e-07	0.0489328	1.98e-06	7.00714	0.0729		-22.9079	-5.56454	0.0650306
3-7	0.00832834	9.85e-07	0.0489352	1.79e-06	7.25697	0.0741		-22.8596	-5.51536	0.0626872
3-7	0.00832774	1.16e-06	0.048934	1.81e-06	7.07185	0.0763		-22.8854	-5.54157	0.0629272
nbs123	0.00843016	1.31e-06	0.0500822	1.9e-06	7.6138	0.0991
3-7	0.0083292	1e-06	0.048942	1.74e-06	7.07655	0.0716		-22.8385	-5.49383	0.0676761
3-7	0.00832943	1.12e-06	0.0489434	1.68e-06	6.97626	0.0841		-22.8119	-5.46681	0.0670397
3-7	0.00832912	1.11e-06	0.0489386	2.31e-06	7.15599	0.0595		-22.9065	-5.56313	0.0744588
nbs123	0.00843104	1.17e-06	0.0500896	2.17e-06	7.77662	0.0687
3-7	0.00833016	9.11e-07	0.0489476	1.91e-06	6.91316	0.0603		-22.7849	-5.43934	0.0734811
3-7	0.00832935	1e-06	0.0489376	1.91e-06	7.00044	0.0635		-22.9838	-5.64171	0.0734853
3-7	0.00833001	1.1e-06	0.0489414	1.92e-06	6.85163	0.0602		-22.9095	-5.56613	0.0735925
nbs123	0.00842946	9.94e-07	0.0500881	2.24e-06	7.31656	0.0584
4-4	0.00832893	1e-06	0.0489415	1.74e-06	7.06607	0.0668		-22.923	-5.57985	0.065357
4-4	0.00833121	1.04e-06	0.0489399	2.09e-06	7.13072	0.0722		-22.9547	-5.61216	0.0695075
4-4	0.0083332	9.92e-07	0.0489482	2.07e-06	6.8708	0.0877		-22.7892	-5.44372	0.0692528
nbs123	0.00843001	9.62e-07	0.0500914	1.59e-06	7.68044	0.073
4-4	0.00833187	1.09e-06	0.0489443	1.89e-06	7.14108	0.0812		-22.7984	-5.45309	0.0646086
4-4	0.00833101	1.17e-06	0.048942	2.27e-06	6.79827	0.0696		-22.8435	-5.49901	0.0695296
4-4	0.00833185	9.09e-07	0.0489373	2.14e-06	6.99674	0.0693		-22.9378	-5.59492	0.0677893
nbs123	0.00842919	1e-06	0.0500809	2.05e-06	7.16077	0.0698
4-4	0.00833025	1.09e-06	0.048942	1.8e-06	6.96061	0.0717		-22.7701	-5.42425	0.0674101
4-4	0.00833229	1.13e-06	0.0489443	1.88e-06	6.84318	0.0531		-22.7236	-5.3769	0.0683146
4-4	0.00832779	1.12e-06	0.0489415	1.69e-06	6.8981	0.0645		-22.7809	-5.43523	0.0662109
nbs123	0.00843109	1e-06	0.0500838	1.95e-06	7.4088	0.0677
4-4	0.00832813	1e-06	0.0489453	1.76e-06	7.09032	0.0711		-22.6774	-5.3299	0.0634832
4-4	0.00832922	9.2e-07	0.0489401	1.73e-06	7.16375	0.067		-22.7806	-5.43497	0.0631401
4-4	0.00832861	1.14e-06	0.048948	2.03e-06	7.07137	0.0726		-22.6231	-5.27463	0.0667613
nbs123	0.0084277	9.82e-07	0.0500781	1.75e-06	7.51	0.0727
4-4	0.00832877	1e-06	0.0489485	1.6e-06	7.23643	0.0829		-22.5647	-5.2152	0.0594884
4-4	0.008328	1.07e-06	0.0489469	2.08e-06	7.03962	0.0865		-22.5964	-5.24752	0.0653929
4-4	0.00833115	9.95e-07	0.048946	1.59e-06	7.24839	0.0772		-22.6132	-5.26459	0.0593772
nbs123	0.008429	9.63e-07	0.0500789	1.77e-06	7.48434	0.0767
4-4	0.00833092	1.11e-06	0.048943	1.84e-06	7.21111	0.0766		-22.7021	-5.35507	0.065494
4-4	0.00833008	9.71e-07	0.0489397	1.95e-06	7.23521	0.0826		-22.7674	-5.42152	0.0668111
4-4	0.00832982	1e-06	0.0489425	2.29e-06	7.32654	0.0626		-22.7121	-5.36523	0.0711714
nbs123	0.00842936	1.18e-06	0.050081	2.02e-06	7.59011	0.121
4-4	0.00833041	9.51e-07	0.0489312	1.95e-06	7.21432	0.0708		-22.9558	-5.61323	0.0692386
4-4	0.00832903	9.25e-07	0.0489467	1.76e-06	7.41725	0.0795		-22.6475	-5.29946	0.0670728
4-4	0.00832775	9.81e-07	0.0489417	1.83e-06	7.00664	0.0633		-22.7457	-5.39945	0.0678523
nbs123	0.0084286	8.9e-07	0.0500807	1.99e-06	7.52998	0.0766
4-4	0.00833007	1.13e-06	0.0489495	2.01e-06	6.93445	0.0743		-22.5897	-5.24068	0.0655636
4-4	0.00832759	1.15e-06	0.0489425	1.84e-06	6.96656	0.076		-22.7287	-5.38212	0.0634494
4-4	0.00832793	1.03e-06	0.0489397	2.32e-06	6.96043	0.0738		-22.7854	-5.43983	0.0697115
nbs123	0.0084313	8.6e-07	0.0500808	1.61e-06	7.23075	0.0658
4-5	0.00833208	1.11e-06	0.04894	1.75e-06	7.07016	0.0707		-22.7424	-5.39607	0.0639336
4-5	0.00833072	8.76e-07	0.0489356	1.82e-06	7.02537	0.0735		-22.8307	-5.4859	0.0647463
4-5	0.00833089	1.07e-06	0.0489322	2.22e-06	6.95148	0.0775		-22.8989	-5.55541	0.0697653
nbs123	0.0084294	9.76e-07	0.050077	2.11e-06	7.47896	0.0767
4-5	0.00832849	1.05e-06	0.0489397	1.98e-06	6.94438	0.0675		-22.6945	-5.34736	0.067165
4-5	0.00833103	9.2e-07	0.0489383	1.93e-06	6.9773	0.0754		-22.7231	-5.37643	0.0665553
4-5	0.00833111	1.09e-06	0.0489427	2.2e-06	6.98264	0.0627		-22.634	-5.28578	0.0699631
nbs123	0.00843376	9.65e-07	0.0500753	1.66e-06	7.34823	0.0727
4-5	0.00833199	9.35e-07	0.0489381	2.01e-06	6.97699	0.0612		-22.768	-5.42209	0.0695726
4-5	0.00832977	1e-06	0.0489377	2.02e-06	6.99344	0.0669		-22.7762	-5.43043	0.0696936
4-5	0.00833187	1.03e-06	0.0489365	1.93e-06	6.89793	0.0714		-22.8003	-5.45502	0.0686209
nbs123	0.00842933	1.13e-06	0.0500813	2.27e-06	7.26162	0.0743
4-5	0.00833127	1.02e-06	0.0489378	1.75e-06	6.88069	0.0702		-22.8198	-5.47486	0.0666726
4-5	0.00833017	1.11e-06	0.0489391	2.19e-06	7.07423	0.0718		-22.793	-5.44763	0.0718957
4-5	0.00832869	1.1e-06	0.048941	2.42e-06	7.092	0.0621		-22.7565	-5.41044	0.07491
nbs123	0.00842846	1.03e-06	0.05008	1.67e-06	7.29279	0.0838
4-5	0.0083282	1e-06	0.048939	1.76e-06	7.0706	0.0674		-22.778	-5.43228	0.0595328
4-5	0.00833029	9.88e-07	0.0489416	2.03e-06	7.05605	0.0739		-22.7264	-5.37984	0.0630178
4-5	0.00833292	9.33e-07	0.0489356	1.71e-06	7.03606	0.0605		-22.8473	-5.5028	0.0589228
nbs123	0.0084304	1.01e-06	0.0500795	1.69e-06	7.56954	0.0729
4-5	0.00833509	9.32e-07	0.0489405	2e-06	7.2442	0.0646		-22.807	-5.46178	0.0677021
4-5	0.00832989	1.18e-06	0.048934	2.02e-06	6.97508	0.0813		-22.9363	-5.59346	0.0679528
4-5	0.00833263	1e-06	0.0489391	2.09e-06	7.26031	0.0712		-22.8353	-5.49063	0.0688285
nbs123	0.00842785	9.63e-07	0.050086	2.11e-06	7.58199	0.0802
4-5	0.00832889	1.27e-06	0.048945	2.97e-06	6.78328	0.0816		-22.703	-5.35595	0.0842619
4-5	0.00832801	9.57e-07	0.0489396	1.75e-06	6.91813	0.0718		-22.81	-5.46487	0.0685319
4-5	0.00832856	1e-06	0.04894	1.74e-06	7.16029	0.073		-22.8016	-5.45634	0.0684253
nbs123	0.00842771	1.24e-06	0.050078	2.03e-06	7.19983	0.0631
4-5	0.00832909	9.84e-07	0.0489398	1.93e-06	6.96314	0.0749		-22.7749	-5.42914	0.0700482
4-5	0.00832682	9.86e-07	0.0489432	2.03e-06	7.08194	0.0657		-22.7064	-5.35944	0.0712169
4-5	0.00833009	1.1e-06	0.0489412	1.9e-06	7.13848	0.0722		-22.7463	-5.40008	0.0697043
nbs123	0.00843124	1.06e-06	0.0500828	2.07e-06	7.23027	0.0546
4-6	0.00833102	9.67e-07	0.0489406	2.15e-06	7.1953	0.0738		-22.9219	-5.5788	0.0747294
4-6	0.0083338	1.21e-06	0.0489438	1.73e-06	6.99767	0.0738		-22.8582	-5.51398	0.0700282
4-6	0.00833094	1.02e-06	0.048943	2.06e-06	7.22848	0.0648		-22.8736	-5.52962	0.0736622
nbs123	0.00842808	9.62e-07	0.0500947	2.21e-06	6.88032	0.0515
4-6	0.00832929	1.16e-06	0.0489375	1.94e-06	6.8833	0.0616		-22.9205	-5.57736	0.0695608
4-6	0.00832826	1.06e-06	0.04894	1.9e-06	6.8457	0.0605		-22.8696	-5.52554	0.0690971
4-6	0.00833186	1.03e-06	0.0489358	1.6e-06	7.04746	0.0692		-22.9539	-5.61129	0.0658499
nbs123	0.00842768	9.56e-07	0.0500763	1.82e-06	7.49327	0.0752
4-6	0.00833158	1.09e-06	0.048945	1.95e-06	6.96248	0.0641		-22.5958	-5.24691	0.0650316
4-6	0.00833024	9.82e-07	0.0489418	1.75e-06	6.97807	0.066		-22.6583	-5.31053	0.0626129
4-6	0.00833274	1.1e-06	0.0489402	1.62e-06	7.10099	0.0701		-22.6903	-5.34305	0.0611355
nbs123	0.00843052	9.54e-07	0.0500767	1.82e-06	7.43459	0.0711
4-6	0.00833183	1.08e-06	0.0489434	1.9e-06	6.92444	0.0646		-22.6584	-5.31059	0.0644102
4-6	0.00832871	1.14e-06	0.0489354	1.71e-06	6.8052	0.0647		-22.8195	-5.47459	0.062151
4-6	0.00833153	1.06e-06	0.0489368	1.79e-06	6.96522	0.0712		-22.7902	-5.44472	0.063084
nbs123	0.00843289	1.02e-06	0.0500796	1.82e-06	7.3858	0.0707
4-6	0.00833434	1.02e-06	0.0489414	1.88e-06	7.03465	0.0669		-22.7588	-5.41273	0.0667494
4-6	0.00833121	1.1e-06	0.04894	1.75e-06	6.95726	0.0707		-22.7857	-5.44017	0.0652575
4-6	0.00833428	9.84e-07	0.0489417	1.96e-06	6.92108	0.0706		-22.753	-5.40684	0.0677031
nbs123	0.0084302	1.01e-06	0.0500827	2.04e-06	7.08612	0.0703
4-6	0.00833336	1.13e-06	0.0489412	1.67e-06	6.88377	0.0718		-22.813	-5.46792	0.0664687
4-6	0.00833284	9.44e-07	0.04894	1.7e-06	6.93479	0.0652		-22.8359	-5.49129	0.0667859
4-6	0.00832821	9.2e-07	0.0489423	1.92e-06	6.77886	0.0682		-22.7914	-5.44597	0.0692295
nbs123	0.00843218	1.01e-06	0.0500848	2e-06	7.29742	0.0658
4-6	0.00833248	1.09e-06	0.048945	1.97e-06	6.91921	0.0647		-22.743	-5.39667	0.0687789
4-6	0.00833201	1.05e-06	0.0489434	1.81e-06	6.90276	0.0679		-22.7743	-5.42857	0.0669191
4-6	0.00833001	1.12e-06	0.0489422	2.07e-06	6.902	0.0641		-22.7975	-5.45215	0.0699956
nbs123	0.00843088	1.02e-06	0.0500833	1.95e-06	7.21177	0.0647
4-6	0.00833091	1.12e-06	0.0489462	1.77e-06	6.79417	0.0653		-22.7712	-5.42538	0.0645989
4-6	0.00833151	1.07e-06	0.0489451	1.99e-06	6.92038	0.0678		-22.7936	-5.44814	0.0672188
4-6	0.00832758	1.01e-06	0.0489514	1.95e-06	6.79936	0.0636		-22.6684	-5.32073	0.0667246
nbs123	0.0084281	1.05e-06	0.0500902	1.84e-06	7.23327	0.0664
4-7	0.0083317	1.12e-06	0.0489518	1.89e-06	6.91703	0.0674		-22.7664	-5.42052	0.0671918
4-7	0.0083328	1.09e-06	0.0489484	1.58e-06	6.90378	0.0669		-22.8347	-5.49001	0.063765
4-7	0.00833276	9.46e-07	0.0489447	2.11e-06	7.02464	0.0662		-22.9072	-5.56376	0.069875
nbs123	0.00843035	1.03e-06	0.0500942	2.05e-06	7.31595	0.0677
4-7	0.00833019	9.24e-07	0.0489472	1.62e-06	6.77459	0.069		-22.7579	-5.41182	0.066799
4-7	0.00833113	1.07e-06	0.048946	1.8e-06	6.67168	0.0689		-22.7814	-5.4358	0.0686959
4-7	0.00832969	1.11e-06	0.0489494	1.86e-06	6.67376	0.0548		-22.7133	-5.36651	0.0693584
nbs123	0.00843	1.01e-06	0.05008	2.06e-06	6.98996	0.0659
4-7	0.00833598	1.15e-06	0.0489369	2.02e-06	6.66446	0.0649		-22.9069	-5.56354	0.0698611
4-7	0.00833365	1.09e-06	0.048937	2.2e-06	6.79451	0.0617		-22.9051	-5.56171	0.0720954
4-7	0.0083331	9.04e-07	0.0489469	1.86e-06	6.65505	0.066		-22.7079	-5.36094	0.0679762
nbs123	0.00843207	9.97e-07	0.0500883	1.93e-06	6.97778	0.0651
4-7	0.0083298	1.16e-06	0.0489462	1.91e-06	6.57662	0.0583		-22.8433	-5.49878	0.0644919
4-7	0.00833156	1.07e-06	0.0489447	1.91e-06	6.62865	0.0758		-22.8715	-5.52743	0.0644925
4-7	0.0083292	9.96e-07	0.0489458	2.14e-06	6.56316	0.0643		-22.8499	-5.50548	0.0674392
nbs123	0.00842946	1.07e-06	0.0500924	1.7e-06	6.8884	0.07
4-7	0.00833254	1.17e-06	0.0489451	1.75e-06	6.5972	0.0729		-22.8151	-5.47009	0.063947
4-7	0.00833123	1.14e-06	0.0489509	1.8e-06	6.71022	0.0713		-22.6987	-5.35163	0.0645213
4-7	0.00833323	1.06e-06	0.0489426	1.86e-06	6.68809	0.0698		-22.8638	-5.51967	0.0652313
nbs123	0.00843216	1.05e-06	0.0500833	2.04e-06	6.90688	0.0665
4-7	0.00833079	1.21e-06	0.048946	2.17e-06	6.55861	0.0669		-22.7535	-5.4074	0.0721328
4-7	0.00833081	1.05e-06	0.0489449	1.76e-06	6.63129	0.0744		-22.7761	-5.43036	0.0673099
4-7	0.00833233	1.02e-06	0.0489499	2.05e-06	6.42468	0.0717		-22.6769	-5.32937	0.0706505
nbs123	0.00842976	1.13e-06	0.050088	1.99e-06	6.72275	0.0617
4-7	0.0083317	1.16e-06	0.0489478	2.33e-06	6.39669	0.0689		-22.8213	-5.47638	0.0718638
4-7	0.00833289	1.13e-06	0.0489438	1.98e-06	6.35885	0.0745		-22.9016	-5.55806	0.0673428
4-7	0.00833555	1.13e-06	0.0489547	1.67e-06	6.54013	0.0696		-22.684	-5.33659	0.0637353
nbs123	0.00843212	1.02e-06	0.0500938	1.82e-06	6.85111	0.0677
4-7	0.00833292	1.18e-06	0.048946	1.74e-06	6.68705	0.0684		-22.7859	-5.4404	0.062602
4-7	0.00833153	1.03e-06	0.0489518	1.89e-06	6.75027	0.0669		-22.6701	-5.32254	0.064389
4-7	0.00833262	1.2e-06	0.0489495	1.82e-06	6.62822	0.0599		-22.7149	-5.36806	0.0635428
nbs123	0.00843138	9.98e-07	0.0500807	1.83e-06	6.8686	0.0772
4-7	0.00833251	1.06e-06	0.0489482	2.05e-06	6.36629	0.0637		-22.7709	-5.42504	0.0682009
4-7	0.00834012	9.99e-07	0.0489502	2.09e-06	6.36491	0.0602		-22.7313	-5.38481	0.0687047
4-7	0.00833195	1.24e-06	0.0489495	1.85e-06	6.43167	0.0665		-22.7459	-5.39964	0.0657703
nbs123	0.00843311	1.03e-06	0.050097	1.98e-06	6.70817	0.0668
nbs123	0.00840391	1.29e-06	0.0500013	2.37e-06	6.24493	0.0677
3-3	0.00831566	1.11e-06	0.0488691	2.15e-06	5.98812	0.0631		-22.7529	-5.40673	0.0747012
3-3	0.00831205	1.35e-06	0.0488636	2.07e-06	5.89179	0.0573		-22.8626	-5.51846	0.0737517
3-3	0.00830341	1.33e-06	0.0488658	2.19e-06	5.86186	0.0571		-22.8185	-5.47348	0.075188
nbs123	0.00840333	1.21e-06	0.0500125	1.87e-06	6.08953	0.0589
3-3	0.00828942	1.26e-06	0.0488747	2.02e-06	5.91414	0.0559		-22.8446	-5.50009	0.0706268
3-3	0.00828933	1.32e-06	0.0488725	2.28e-06	5.91441	0.0568		-22.8886	-5.54486	0.0738673
3-3	0.00828881	1.26e-06	0.0488723	2.27e-06	5.93857	0.0569		-22.8912	-5.54751	0.0737383
nbs123	0.00838298	1.33e-06	0.0500221	2.17e-06	6.1034	0.0591
3-3	0.00827996	1.09e-06	0.0488738	2.07e-06	5.8963	0.0555		-22.9486	-5.60595	0.0744338
3-3	0.0082912	1.47e-06	0.048873	1.87e-06	5.8415	0.0596		-22.9662	-5.62385	0.0721842
3-3	0.00827755	1.52e-06	0.0488736	2.09e-06	5.80664	0.0539		-22.9536	-5.61103	0.0746676
nbs123	0.00838076	1.07e-06	0.0500215	2.16e-06	5.9123	0.0648
3-3	0.00827423	1.23e-06	0.0488806	1.91e-06	5.72676	0.0589		-22.807	-5.46183	0.0719082
3-3	0.00828943	1.23e-06	0.0488781	2.12e-06	5.77528	0.0571		-22.858	-5.51371	0.0743316
3-3	0.00828181	1.57e-06	0.0488746	2.21e-06	5.74966	0.0586		-22.9268	-5.58371	0.0754228
nbs123	0.00836865	1.69e-06	0.0500215	2.11e-06	5.95433	0.0589
3-3	0.0082899	1.36e-06	0.0488813	2.35e-06	5.69161	0.0564		-22.7641	-5.4182	0.0773961
3-3	0.00828709	1.35e-06	0.0488782	2.12e-06	5.74526	0.0587		-22.8257	-5.48087	0.0745661
3-3	0.00828349	1.39e-06	0.0488798	1.94e-06	5.73061	0.0532		-22.7925	-5.44709	0.0724852
nbs123	0.00838793	1.31e-06	0.0500184	2.18e-06	5.99861	0.0494
3-3	0.00826684	1.35e-06	0.0488785	2.13e-06	5.83026	0.0564		-22.7059	-5.35891	0.0721925
3-3	0.00828389	1.31e-06	0.048873	2.19e-06	5.77957	0.0544		-22.8164	-5.47144	0.0729431
3-3	0.00827853	1.46e-06	0.0488726	2.17e-06	5.84863	0.0585		-22.8248	-5.47998	0.0726927
nbs123	0.00838673	1.2e-06	0.0500099	1.88e-06	6.00182	0.0556
1-8	0.00828353	1.35e-06	0.0488757	2.1e-06	5.71103	0.0565		-22.8013	-5.45607	0.070864
1-8	0.00827943	1.36e-06	0.0488751	2.02e-06	5.69636	0.0589		-22.8127	-5.46766	0.069884
1-8	0.00827287	1.28e-06	0.0488749	2.16e-06	5.74989	0.0619		-22.8165	-5.47153	0.0716154
nbs123	0.00837295	1.4e-06	0.0500223	2.1e-06	6.03412	0.0593
1-8	0.0082846	1.2e-06	0.0488751	2.42e-06	5.78158	0.0571		-22.912	-5.56869	0.0794357
1-8	0.00827853	1.43e-06	0.0488732	1.88e-06	5.75401	0.0591		-22.9492	-5.60654	0.0730622
1-8	0.0082783	1.46e-06	0.048873	2.08e-06	5.81174	0.0591		-22.9536	-5.61101	0.0752973
nbs123	0.00836254	1.62e-06	0.05002	2.29e-06	6.05754	0.0595
1-8	0.00828491	1.35e-06	0.0488698	2.02e-06	5.74616	0.0569		-22.9215	-5.5784	0.0742805
1-8	0.00828139	1.15e-06	0.0488688	2.5e-06	5.81736	0.0567		-22.9407	-5.59794	0.0801632
1-8	0.0082739	1.48e-06	0.0488701	2e-06	5.7457	0.0599		-22.9159	-5.57271	0.0740534
nbs123	0.00835576	1.71e-06	0.0500126	2.07e-06	6.06669	0.0584
1-8	0.00826068	1.82e-06	0.0488728	2.14e-06	5.79462	0.0601		-22.7287	-5.38214	0.0744874
1-8	0.00826045	1.63e-06	0.0488769	1.99e-06	5.69978	0.0583		-22.6461	-5.29809	0.0727236
1-8	0.00828135	1.51e-06	0.0488732	1.97e-06	5.78331	0.0573		-22.7205	-5.37379	0.072497
nbs123	0.00834992	1.67e-06	0.0500063	2.19e-06	6.03537	0.0595
1-8	0.00827024	1.48e-06	0.0488678	2.06e-06	5.65799	0.0551		-22.8314	-5.48667	0.0747993
1-8	0.00826359	1.49e-06	0.0488689	2.29e-06	5.67669	0.0609		-22.8096	-5.46449	0.0775487
1-8	0.00825273	2.01e-06	0.0488728	2.17e-06	5.57356	0.0575		-22.7318	-5.38532	0.076088
nbs123	0.00837328	1.21e-06	0.0500129	2.18e-06	5.91742	0.0586
1-8	0.00821822	2.09e-06	0.0488737	2.22e-06	5.6705	0.0563		-22.7561	-5.41005	0.0763458
1-8	0.00825825	1.99e-06	0.0488752	2.1e-06	5.66291	0.0618		-22.7259	-5.37932	0.0749103
1-8	0.00826237	1.52e-06	0.0488783	2.24e-06	5.60952	0.0579		-22.6654	-5.31766	0.0765875
nbs123	0.00833614	1.53e-06	0.0500107	2.16e-06	6.02266	0.0585
1-8	0.00825716	1.95e-06	0.0488688	2.16e-06	5.64311	0.0579		-22.8227	-5.47776	0.0947224
1-8	0.00824576	1.5e-06	0.0488701	2.12e-06	5.61477	0.0612		-22.7967	-5.4513	0.0943427
1-8	0.00823157	1.99e-06	0.04887	2.17e-06	5.70687	0.0548		-22.7985	-5.45313	0.0948175
nbs123	0.00833193	2.1e-06	0.0500096	3.59e-06	6.4345	0.111
1-8	0.00822313	1.95e-06	0.0488759	2.12e-06	5.64452	0.0555		-22.6668	-5.31914	0.102425
1-8	0.0081984	2.2e-06	0.0488786	2e-06	5.63465	0.0587		-22.614	-5.26541	0.101408
1-8	0.00824963	1.91e-06	0.0488749	2.11e-06	5.66259	0.0615		-22.6876	-5.34031	0.102339
nbs123	0.00831961	2.74e-06	0.0500093	2.94e-06	5.36432	0.123
2-8	0.00824606	1.57e-06	0.048871	1.89e-06	5.68363	0.0567		-22.7703	-5.42443	0.0824622
2-8	0.00825456	1.64e-06	0.0488755	2.08e-06	5.63123	0.0565		-22.6807	-5.33326	0.0843535
2-8	0.00822808	2.23e-06	0.0488703	2.39e-06	5.74453	0.0618		-22.7853	-5.43969	0.0877274
nbs123	0.0083475	1.63e-06	0.0500102	2.15e-06	5.81479	0.0596
2-8	0.00821428	2.86e-06	0.0488718	2.32e-06	5.59508	0.0601		-22.8365	-5.49187	0.0803868
2-8	0.00822847	2.01e-06	0.0488692	2.22e-06	5.4876	0.0604		-22.8879	-5.54417	0.0791971
2-8	0.00821428	1.92e-06	0.0488717	2.36e-06	5.58238	0.0555		-22.8377	-5.4931	0.0808729
nbs123	0.00831962	2.04e-06	0.0500177	2.43e-06	6.02761	0.0687
2-8	0.00821547	2.41e-06	0.0488741	2.25e-06	5.54349	0.0573		-22.8365	-5.4918	0.0823546
2-8	0.00821443	2.17e-06	0.0488656	2.38e-06	5.60291	0.0588		-23.0064	-5.66476	0.0838755
2-8	0.00821095	2.33e-06	0.0488672	2.11e-06	5.6134	0.0622		-22.9744	-5.6322	0.0807916
nbs123	0.00830558	3.04e-06	0.0500149	2.4e-06	5.89029	0.0681
2-8	0.00820129	2.23e-06	0.0488683	2.12e-06	5.65217	0.0606		-22.8981	-5.55453	0.0778926
2-8	0.00823807	1.73e-06	0.0488703	2.35e-06	5.52436	0.0518		-22.8599	-5.51566	0.0806076
2-8	0.00824619	1.78e-06	0.0488695	2.13e-06	5.72313	0.0619		-22.8759	-5.53194	0.0780062
nbs123	0.0083447	1.86e-06	0.0500122	2.17e-06	5.97722	0.0591
2-8	0.00824704	1.76e-06	0.0488697	2.31e-06	5.61734	0.0558		-22.7777	-5.43201	0.0733761
2-8	0.00822419	2.04e-06	0.0488698	2.25e-06	5.66161	0.0581		-22.7747	-5.42895	0.0725911
2-8	0.00820547	2.11e-06	0.0488663	2.41e-06	5.63895	0.0585		-22.8459	-5.50141	0.0747129
nbs123	0.0083251	2.4e-06	0.0500053	1.78e-06	5.90426	0.0585
2-8	0.00821532	2.2e-06	0.0488623	2.5e-06	5.58003	0.0563		-22.8302	-5.48544	0.0747136
2-8	0.00822802	2.13e-06	0.0488669	2.2e-06	5.57123	0.0578		-22.74	-5.39364	0.0706483
2-8	0.00822031	2.12e-06	0.0488664	2.29e-06	5.49367	0.0606		-22.7486	-5.4024	0.0718362
nbs123	0.00828953	2.85e-06	0.0500026	2.06e-06	5.86209	0.0617
2-8	0.00822624	1.9e-06	0.0488652	2.41e-06	5.50849	0.052		-22.7731	-5.42733	0.0792601
2-8	0.00823046	2.23e-06	0.0488695	1.79e-06	5.58325	0.0548		-22.6861	-5.33879	0.0720513
2-8	0.00821534	2.55e-06	0.0488639	2.14e-06	5.50937	0.0545		-22.7989	-5.45359	0.0759459
nbs123	0.00827373	2.68e-06	0.0500053	2.32e-06	5.84813	0.0568
3-8	0.00822943	2.57e-06	0.0488626	1.95e-06	5.46909	0.0529		-22.847	-5.5025	0.0736601
3-8	0.00821494	1.86e-06	0.0488644	2.08e-06	5.53124	0.0527		-22.811	-5.46587	0.0751339
3-8	0.00820249	2.68e-06	0.0488649	2.1e-06	5.46222	0.0565		-22.8024	-5.45711	0.0753663
nbs123	0.00824936	2.06e-06	0.0500049	2.05e-06	5.68529	0.051
3-8	0.00821722	2.6e-06	0.0488621	2.26e-06	5.51494	0.0581		-22.8967	-5.55316	0.0747216
3-8	0.00823338	2.48e-06	0.0488603	2.29e-06	5.43087	0.054		-22.9325	-5.58959	0.0751042
3-8	0.00819354	2.54e-06	0.0488576	2e-06	5.49523	0.057		-22.9875	-5.64556	0.0715522
nbs123	0.00825938	3.33e-06	0.0500093	2.1e-06	5.88169	0.059
3-8	0.00819413	2.8e-06	0.048855	2.34e-06	5.59094	0.0526		-22.9298	-5.58679	0.0776485
3-8	0.00821727	2.01e-06	0.0488588	2.5e-06	5.56597	0.0541		-22.8548	-5.51046	0.0797079
3-8	0.0081492	2.37e-06	0.0488577	1.99e-06	5.52059	0.057		-22.8764	-5.53244	0.073445
nbs123	0.00832461	2.02e-06	0.0499938	2.22e-06	5.77748	0.0601
3-8	0.0082281	2.86e-06	0.0488608	2.12e-06	5.41288	0.0507		-22.7118	-5.36489	0.078354
3-8	0.0081867	3.89e-06	0.0488613	2.18e-06	5.46619	0.0586		-22.7032	-5.35614	0.0790404
3-8	0.00823757	1.91e-06	0.0488598	2.33e-06	5.52929	0.0569		-22.7338	-5.38728	0.0808139
nbs123	0.00829746	2.15e-06	0.0499989	2.39e-06	5.81007	0.0597
3-8	0.0082054	1.92e-06	0.0488587	2.14e-06	5.47441	0.0574		-22.8215	-5.47658	0.0764962
3-8	0.00818344	2.47e-06	0.0488583	2.1e-06	5.54081	0.0551		-22.8293	-5.48452	0.0760306
3-8	0.00821271	2.28e-06	0.0488571	2.2e-06	5.527	0.0545		-22.8543	-5.50996	0.0772068
nbs123	0.00823129	3.35e-06	0.0500006	2.03e-06	5.79209	0.0568
3-8	0.00818035	2.29e-06	0.0488546	2.23e-06	5.48656	0.0549		-22.8411	-5.49649	0.0765958
3-8	0.00817152	2.19e-06	0.048853	2.25e-06	5.50762	0.06		-22.8729	-5.52886	0.0768414
3-8	0.00813485	2.48e-06	0.0488559	2.13e-06	5.55124	0.0555		-22.8157	-5.47064	0.0753933
nbs123	0.0082434	2.14e-06	0.0499925	2.31e-06	5.74514	0.0547
3-8	0.00813366	2.72e-06	0.0488546	2.48e-06	5.5945	0.0545		-22.8162	-5.47123	0.0826324
3-8	0.00810574	2.69e-06	0.0488581	2.09e-06	5.58125	0.0545		-22.746	-5.39977	0.0779814
3-8	0.00806931	3.88e-06	0.048856	2.13e-06	5.64901	0.0536		-22.7882	-5.44273	0.0784346
nbs123	0.00815669	2.98e-06	0.0499981	2.3e-06	5.90836	0.0597
4-8	0.00800239	2.77e-06	0.0488615	2.11e-06	5.75051	0.0545		-22.7483	-5.40211	0.0730426
4-8	0.00798959	4.03e-06	0.0488584	2.23e-06	5.72436	0.0592		-22.8095	-5.46439	0.0745226
4-8	0.00797096	3.48e-06	0.0488557	2.13e-06	5.76005	0.0584		-22.8631	-5.51895	0.0732884
nbs123	0.00808536	4.63e-06	0.0499996	1.84e-06	6.04834	0.059
4-8	0.00794707	3.21e-06	0.0488653	2.21e-06	5.83643	0.0554		-22.6179	-5.26941	0.0686331
4-8	0.00798023	3.41e-06	0.0488583	1.91e-06	5.75073	0.0607		-22.7592	-5.41313	0.0647559
4-8	0.00801807	3.58e-06	0.0488563	2.35e-06	5.72997	0.0549		-22.7976	-5.45222	0.07056
nbs123	0.00810116	5.8e-06	0.0499927	1.81e-06	6.13298	0.0611
4-8	0.00805696	3.68e-06	0.0488581	2.36e-06	5.75872	0.0607		-22.7504	-5.40424	0.0742319
4-8	0.00800481	3.76e-06	0.0488551	2.13e-06	5.6171	0.0589		-22.811	-5.46593	0.07126
4-8	0.00804315	4.52e-06	0.0488524	2.33e-06	5.78651	0.0589		-22.864	-5.51987	0.0738374
nbs123	0.00818901	2.89e-06	0.0499984	2.16e-06	6.18118	0.0554
4-8	0.00807304	3.31e-06	0.0488534	1.88e-06	5.80954	0.064		-22.9224	-5.57928	0.0740381
4-8	0.00803907	4.32e-06	0.0488509	2.23e-06	5.83351	0.0607		-22.9726	-5.63038	0.0780037
4-8	0.00804618	3.68e-06	0.0488532	2.07e-06	5.74323	0.0624		-22.9274	-5.58437	0.0761322
nbs123	0.00810448	3.13e-06	0.0500007	2.31e-06	6.47412	0.0503
4-8	0.008085	3.54e-06	0.0488563	2.31e-06	5.5711	0.0607		-22.8406	-5.49601	0.0771636
4-8	0.00804535	2.49e-06	0.0488514	2.34e-06	5.59085	0.0575		-22.9374	-5.59453	0.0775443
4-8	0.00801358	3.12e-06	0.0488505	2.18e-06	5.58669	0.0548		-22.957	-5.61448	0.0755656
nbs123	0.00806975	3.72e-06	0.0499959	1.99e-06	6.02403	0.0609
4-8	0.00797883	4.82e-06	0.0488538	2.1e-06	5.69885	0.0565		-22.8384	-5.49377	0.0698306
4-8	0.00793799	3.14e-06	0.0488517	2.22e-06	5.66438	0.0621		-22.8806	-5.53672	0.0713701
4-8	0.00796248	3.03e-06	0.0488547	2.07e-06	5.63378	0.0549		-22.8216	-5.47667	0.0694538
nbs123	0.00803924	3.75e-06	0.0499954	1.9e-06	6.03954	0.0612
4-8	0.00789999	4.57e-06	0.0488495	2.21e-06	5.73533	0.0575		-22.959	-5.61652	0.0700343
4-8	0.00800936	4.31e-06	0.0488504	2.24e-06	5.70224	0.0572		-22.9412	-5.5984	0.0704321
4-8	0.00800473	4.08e-06	0.0488514	2.28e-06	5.82171	0.0607		-22.9212	-5.57804	0.0709672
nbs123	0.00807657	2.86e-06	0.0499994	1.88e-06	5.99438	0.0582
											-5.46133	0.184133
														measurement repeatability	analytical uncertainty	H-index
														0.196681	0.36468	0.539325
NBS123	0.00861266	1.68e-06	0.0497806	3.13e-06	17.0313	0.256
SPH-1	0.00851255	8.78e-07	0.0485617	2.71e-06	17.8316	0.254		-24.6097	-7.29649	0.103196
SPH-1	0.00850882	9.46e-07	0.0485448	3.01e-06	17.5067	0.255		-24.9495	-7.64237	0.106676
SPH-1	0.00850165	8.56e-07	0.0485582	3.09e-06	17.476	0.254		-24.6792	-7.36722	0.107631
NBS123	0.00859489	9.37e-07	0.0497933	2.98e-06	16.8225	0.245
SPH-1	0.00849085	9.31e-07	0.0485486	2.71e-06	17.6056	0.257		-24.8861	-7.57783	0.0968688
SPH-1	0.00848644	8.98e-07	0.0485585	2.91e-06	17.4289	0.25		-24.6865	-7.37464	0.0992924
SPH-1	0.00846426	8.53e-07	0.0485552	3.09e-06	17.4378	0.241		-24.7531	-7.4425	0.101575
NBS123	0.00856811	9.18e-07	0.049782	2.58e-06	16.9816	0.243
SPH-1	0.00845231	8.7e-07	0.0485544	2.74e-06	17.3638	0.234		-24.6702	-7.35807	0.0964924
SPH-1	0.00845964	9.43e-07	0.0485445	3.15e-06	17.5367	0.236		-24.8692	-7.56067	0.10167
SPH-1	0.00845899	7.29e-07	0.0485617	2.9e-06	17.3825	0.239		-24.5247	-7.21006	0.0984504
NBS123	0.00855529	8.63e-07	0.0497832	2.92e-06	16.8387	0.226
NBS123	0.00860571	1.1e-06	0.0497903	3.11e-06	17.1747	0.263
SPH-1	0.00849944	7.73e-07	0.0485625	2.44e-06	17.6571	0.25		-24.7711	-7.46076	0.102111
SPH-1	0.00849647	7.78e-07	0.0485601	3.03e-06	17.8832	0.247		-24.8185	-7.509	0.108607
SPH-1	0.00849796	8.42e-07	0.0485606	3e-06	17.7991	0.251		-24.8092	-7.49951	0.108253
NBS123	0.00859678	8.36e-07	0.0498016	3.15e-06	17.1672	0.219
SPH-1	0.00849324	8e-07	0.0485644	3.11e-06	17.5677	0.239		-24.8011	-7.49128	0.109554
SPH-1	0.00849167	8.55e-07	0.0485647	3.01e-06	17.6448	0.251		-24.7958	-7.48597	0.108363
NBS123	0.00859167	8.43e-07	0.0497973	3.11e-06	17.3606	0.256
SPH-1	0.00848474	7.33e-07	0.0485688	3e-06	17.5709	0.247		-24.7995	-7.48966	0.121344
SPH-1	0.00848601	6.86e-07	0.0485982	2.79e-06	17.3829	0.255		-24.2092	-6.88887	0.119184
SPH-1	0.00849072	7.47e-07	0.0485943	2.67e-06	17.433	0.245		-24.2867	-6.96775	0.118017
NBS123	0.00858713	1.12e-06	0.0498104	4.17e-06	14.7519	0.277
SPH-1	0.00848017	7.41e-07	0.0485618	3.04e-06	17.5739	0.236		-24.933	-7.62555	0.12136
SPH-1	0.00847796	9.05e-07	0.0485897	3.05e-06	17.5966	0.237		-24.3724	-7.05499	0.121448
NBS123	0.0085788	8.18e-07	0.0497966	3.07e-06	16.92	0.253
SPH-1	0.00847397	8.14e-07	0.0485652	2.79e-06	17.3728	0.242		-24.7164	-7.40516	0.109605
SPH-1	0.0084739	8.73e-07	0.0485694	2.72e-06	17.6312	0.249		-24.6319	-7.31913	0.108854
SPH-1	0.00846981	6.74e-07	0.0485839	2.76e-06	17.3805	0.243		-24.3403	-7.02237	0.109271
NBS123	0.00857561	8.39e-07	0.0497954	3.49e-06	17.1591	0.218
SPH-1	0.00847415	7.85e-07	0.0485716	2.89e-06	17.5424	0.248		-24.7047	-7.39318	0.105426
NBS123	0.00856328	5.97e-07	0.0498085	2.57e-06	17.0128	0.249
SPH-1	0.00845807	6.89e-07	0.0485854	2.6e-06	17.7451	0.238		-24.6036	-7.29036	0.0983801
SPH-1	0.00845779	6.6e-07	0.0485995	2.23e-06	17.6201	0.234		-24.3198	-7.00144	0.0944476
SPH-1	0.00845718	7.88e-07	0.048577	3e-06	17.5811	0.243		-24.7729	-7.4626	0.103097
NBS123	0.0085611	7.92e-07	0.0498133	3.21e-06	16.9455	0.24
SPH-1	0.00845708	7.35e-07	0.0485922	2.71e-06	17.7387	0.255		-24.4309	-7.11455	0.105178
SPH-1	0.00845513	7.83e-07	0.0485847	2.84e-06	17.5267	0.254		-24.5803	-7.26657	0.106626
SPH-1	0.00845417	7.39e-07	0.048597	2.93e-06	17.4368	0.25		-24.3333	-7.01525	0.107644
NBS123	0.0085583	7.45e-07	0.0498048	3.07e-06	16.8984	0.247
											-7.33082	0.425615		measurement repeatability	analytical uncertainty	H-index
														0.425615	0.462275	0.920696
