# Supplementary material for: A newly synthesized reference material for in situ sulfur isotope measurement of sphalerite using laser ablation MC-ICP-MS
Source: Royal Society of Chemistry journal article supplement (doi:10.1039/d2ja00394e), 2023-01-01
Supplement: d2ja00394e4.xlsx [file d2ja00394e4.xlsx]

## Sheet: Sheet1
GS-IRMS
GYIG
Identifier 1	Identifier 2	Row	Analysis	Start	d 34S/32S	δ34S（VCDT）
BZA-7	sample	45	27129	393.3	-8.147	-5.47833	闪锌矿
BZA-8	sample	46	27130	393.1	-8.204	-5.5391	闪锌矿
BZA-9	sample	47	27131	394	-8.122	-5.45168	闪锌矿
BZA-10	sample	51	27135	393.8	-8.036	-5.35998	闪锌矿
BZA-11	sample	52	27136	395.2	-8.119	-5.44848	闪锌矿
BZA-12	sample	53	27137	392.9	-8.024	-5.34719	闪锌矿	-5.43746	0.145539
SKLCD
Identifier 1	Identifier 2	δ34S（VCDT）
BZA-1	PAS-SPH	-5.21091
BZA-2	PAS-SPH	-5.42277
BZA-3	PAS-SPH	-5.32004
BZA-4	PAS-SPH	-5.20922
BZA-5	PAS-SPH	-5.12945
BZA-6	PAS-SPH	-5.22725	-5.25327	0.205782
LA-MC-ICP-MS
Nanjing FocuMS
束斑	6Hz	'34/32 Sulfur'	SE	'33/32 Sulfur'	SE	'32S'	SE	'34S'	SE			NBS-123	17.75	delta 34S V-CDT						1.1
40 µm	NBS-123	0.0495972	7.33e-06	0.00837652	7.42e-07	16.1732	0.496	0.802211	0.0242				NBS-123
40 µm	NBS-123	0.0495959	9.13e-06	0.00837652	7.42e-07	16.1732	0.42	0.802211	0.0205		1	0.0495959	NBS-123	delta 34/32S	1倍SE
40 µm	NWU-Zn	0.048453	4.49e-06	0.00828297	6.09e-07	17.9276	0.285	0.866013	0.0136		2	0.0495962	NWU-Zn	-5.55085	0.0926672
40 µm	NWU-Zn	0.0484427	4.6e-06	0.00828363	6.93e-07	17.6839	0.283	0.856679	0.0137		3	0.0495964	NWU-Zn	-5.76252	0.0949575
40 µm	NWU-Zn	0.0484465	4.3e-06	0.00828196	6.56e-07	17.7196	0.26	0.858645	0.0126		4	0.0495967	NWU-Zn	-5.68989	0.0887576
40 µm	NWU-Zn	0.0484383	4.25e-06	0.00828164	5.45e-07	17.3709	0.242	0.841368	0.0117		5	0.0495969	NWU-Zn	-5.86224	0.0877406
40 µm	NBS-123	0.0495972	9.33e-06	0.00837652	7.42e-07	16.1732	0.506	0.802211	0.0247		6	0.0495972	NBS-123
40 µm	NWU-Zn	0.0484488	4.98e-06	0.00828318	5.63e-07	17.7364	0.28	0.85921	0.0136		7	0.0495972	NWU-Zn	-5.65473	0.102789
40 µm	NWU-Zn	0.0484436	4.21e-06	0.00828251	6.57e-07	18.0207	0.268	0.870413	0.0128		8	0.0495972	NWU-Zn	-5.75978	0.0869052
40 µm	NWU-Zn	0.0484405	3.32e-06	0.00828401	6.13e-07	17.4426	0.268	0.844908	0.013		9	0.0495972	NWU-Zn	-5.82148	0.0685377
40 µm	NWU-Zn	0.0484426	4.56e-06	0.00828279	5.79e-07	17.6948	0.245	0.857182	0.0119		10	0.0495972	NWU-Zn	-5.77934	0.094132
40 µm	NBS-123	0.0495972	8.11e-06	0.00837652	7.42e-07	16.1732	0.492	0.802211	0.024		11	0.0495972	NBS-123
													西北大学 闪锌矿 平均值 =	-5.7351
													2倍SD =	0.199136
GYIG
Num.	Comment	Spot Size	Time	Rep. Rate	Energy	δ34	2se
6609	SAMPLE - 1	60µm	1.3m	5Hz	3	-5.46605	0.0937924
6610	SAMPLE - 2	60µm	1.3m	5Hz	3	-5.11255	0.0858675
6610	SAMPLE - 3	60µm	1.3m	5Hz	3	-5.65353	0.0875996
6610	SAMPLE - 4	60µm	1.3m	5Hz	3	-5.14148	0.0770467
6610	SAMPLE - 5	60µm	1.3m	5Hz	3	-5.77344	0.0754509
6610	SAMPLE - 6	60µm	1.3m	5Hz	3	-5.54591	0.0786456
6610	SAMPLE - 7	60µm	1.3m	5Hz	3	-5.23493	0.0763587
6610	SAMPLE - 8	60µm	1.3m	5Hz	3	-5.30503	0.0747555
6610	SAMPLE - 9	60µm	1.3m	5Hz	3	-5.87681	0.079527
6610	SAMPLE - 10	60µm	1.3m	5Hz	3	-5.44874	0.0787269
6610	SAMPLE - 11	60µm	1.3m	5Hz	3	-5.15916	0.0802359
6613	SAMPLE - 12	60µm	1.3m	5Hz	3	-5.23766	0.0831982
6613	SAMPLE - 13	60µm	1.3m	5Hz	3	-5.68745	0.0783335
6613	SAMPLE - 14	60µm	1.3m	5Hz	3	-5.48015	0.0783258
6613	SAMPLE - 15	60µm	1.3m	5Hz	3	-5.59234	0.0767284
6613	SAMPLE - 16	60µm	1.3m	5Hz	3	-5.36262	0.0767205
6613	SAMPLE - 17	60µm	1.3m	5Hz	3	-5.46487	0.0903972
6613	SAMPLE - 18	60µm	1.3m	5Hz	3	-5.56654	0.0859358
6613	SAMPLE - 19	60µm	1.3m	5Hz	3	-5.15384	0.0888788
6613	SAMPLE - 20	60µm	1.3m	5Hz	3	-5.48026	0.0887801
						-5.43717	0.442004
