# Supplementary figures and images for: A newly synthesized reference material for in situ sulfur isotope measurement of sphalerite using laser ablation MC-ICP-MS
Source: Royal Society of Chemistry journal article supplement (doi:10.1039/d2ja00394e), 2023-01-01

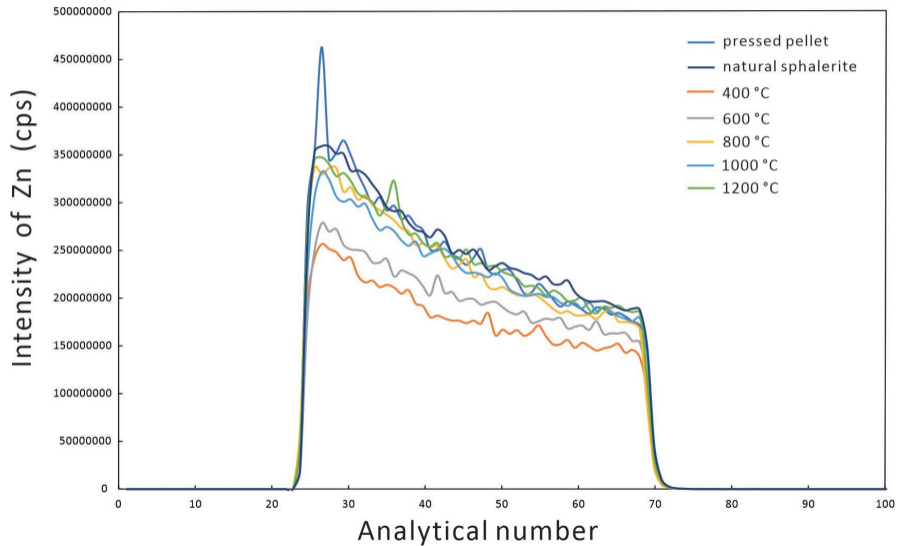

Supplement: d2ja00394e1.pdf [file d2ja00394e1.pdf]
